# Supplementary material for: Oncogenic Kinase Cascades Induce Molecular Mechanisms That Protect Leukemic Cell Models from Lethal Effects of De Novo dNTP Synthesis Inhibition
Source: MDPI journal article supplement (doi:10.3390/cancers13143464), 2021-07-10
Supplement: s1 [file s1]

Original blots corresponding to Fig. 1B

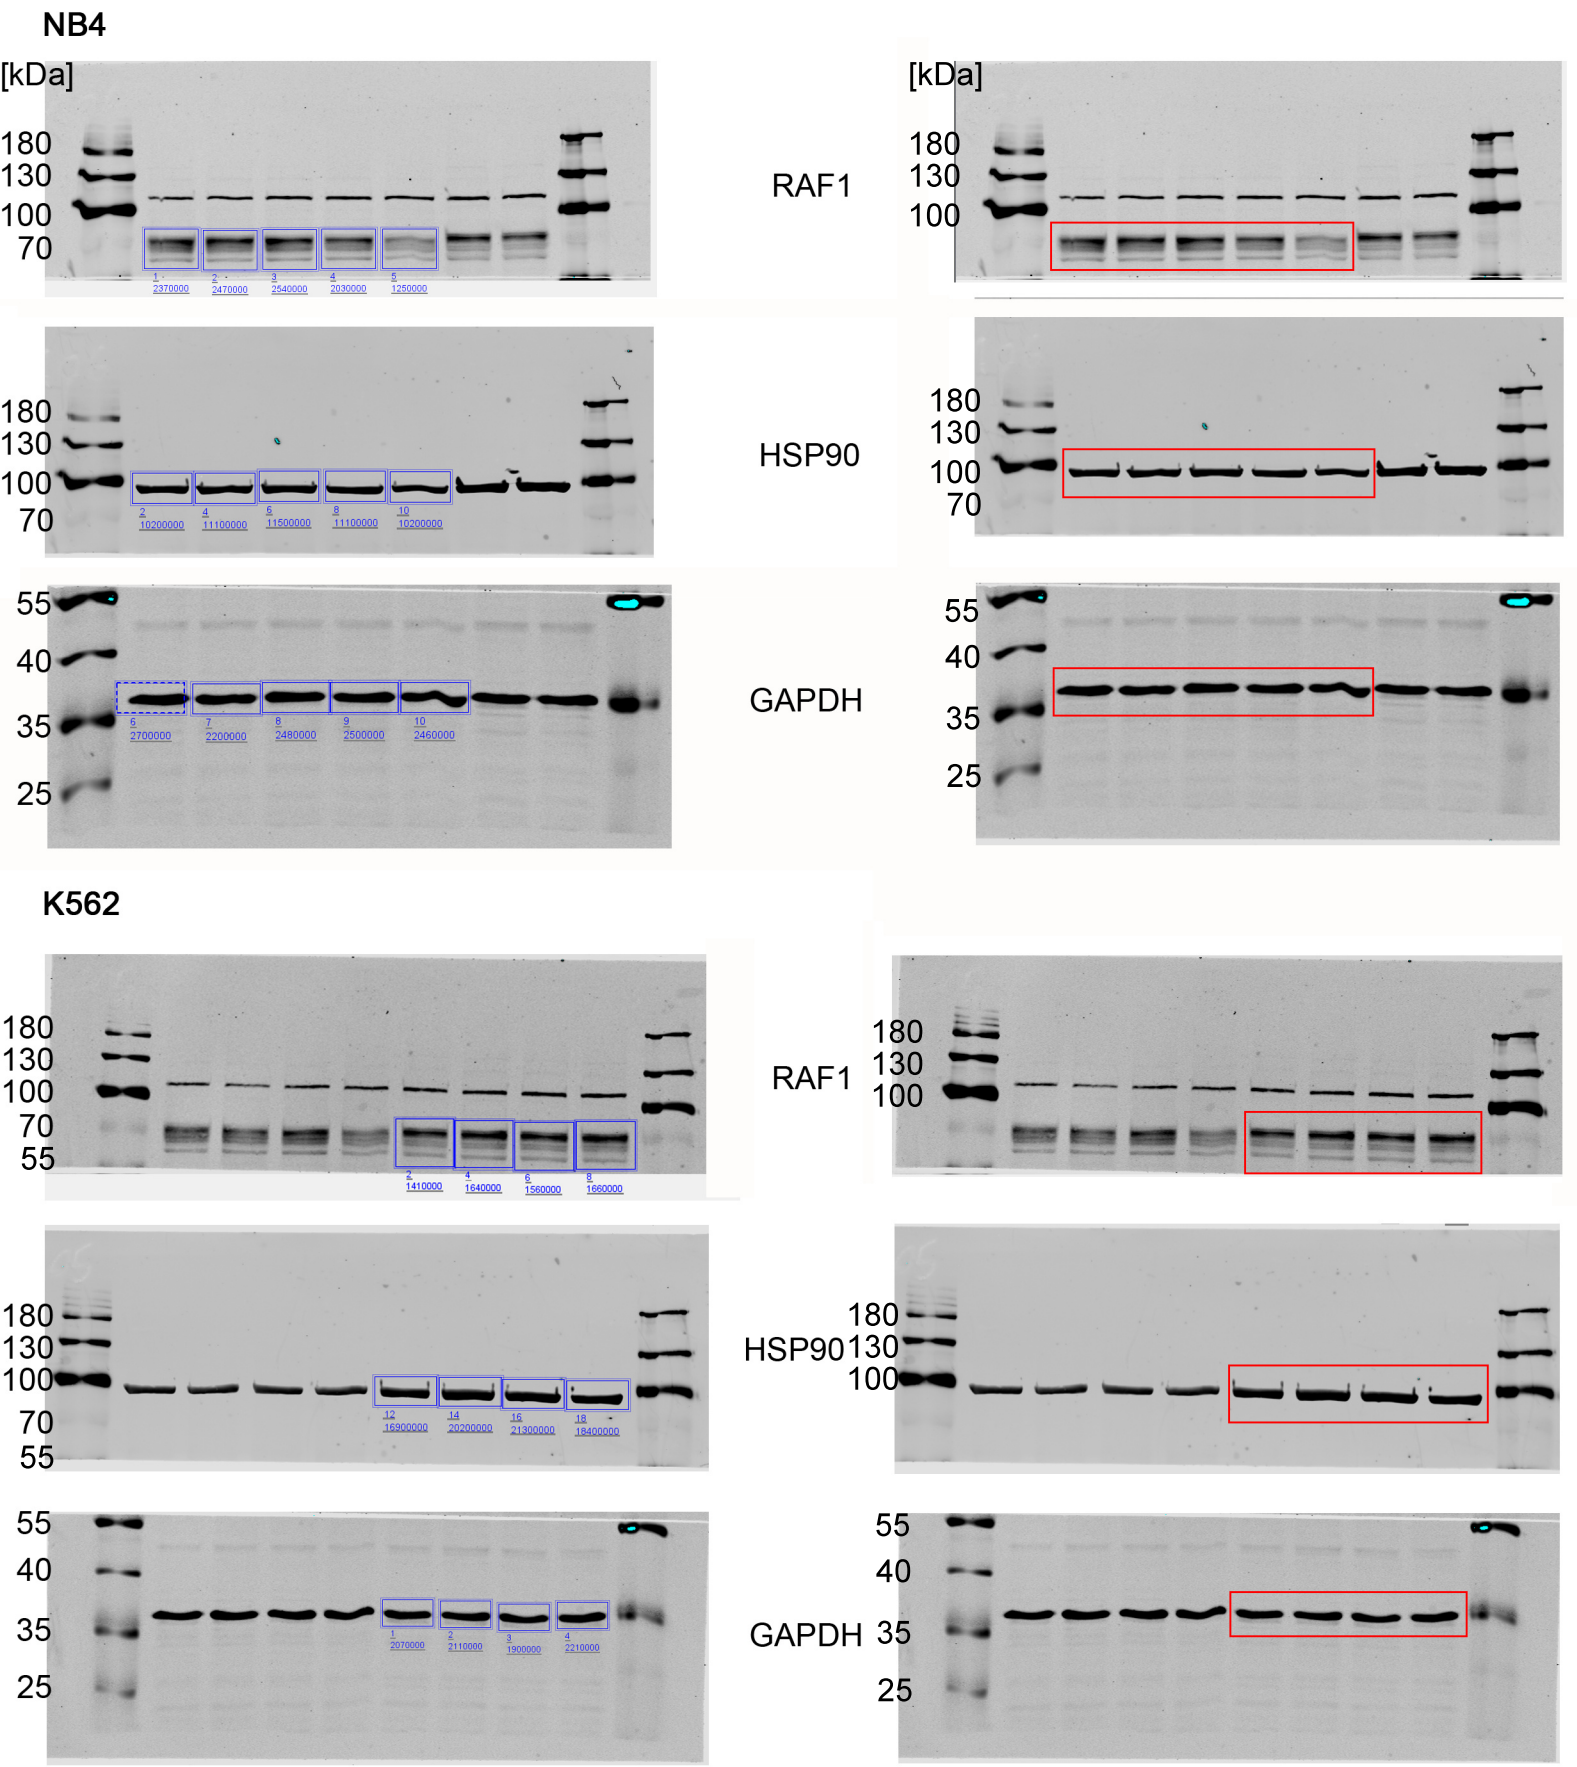

Figure 1B

| NB4             | RAF1    |       | HSP90    |       | GAPDH   |       | K562            | RAF1    |       | HSP90    |       | GAPDH   |       |
|-----------------|---------|-------|----------|-------|---------|-------|-----------------|---------|-------|----------|-------|---------|-------|
|                 | Signal  | Ratio | Signal   | Ratio | Signal  | Ratio |                 | Signal  | Ratio | Signal   | Ratio | Signal  | Ratio |
| con             | 2370000 | 1,00  | 10200000 | 1,00  | 2700000 | 1,00  | con             | 1410000 | 1,00  | 16900000 | 1,00  | 2070000 | 1,00  |
| 0.5 mM HU - 3h  | 2470000 | 1,04  | 11100000 | 1,09  | 2200000 | 0,81  | 0.5 mM HU - 6h  | 1640000 | 1,16  | 20200000 | 1,20  | 2110000 | 1,02  |
| 0.5 mM HU - 6h  | 2540000 | 1,07  | 11500000 | 1,13  | 2480000 | 0,92  | 0.5 mM HU - 12h | 1560000 | 1,11  | 21300000 | 1,26  | 1900000 | 0,92  |
| 0.5 mM HU - 12h | 2030000 | 0,86  | 11100000 | 1,09  | 2500000 | 0,93  | 0.5 mM HU - 24h | 1660000 | 1,18  | 18400000 | 1,09  | 2210000 | 1,07  |
| 0.5 mM HU - 24h | 1250000 | 0,53  | 10200000 | 1,00  | 2460000 | 0,91  |                 |         |       |          |       |         |       |

Original blots corresponding to Fig. 2A

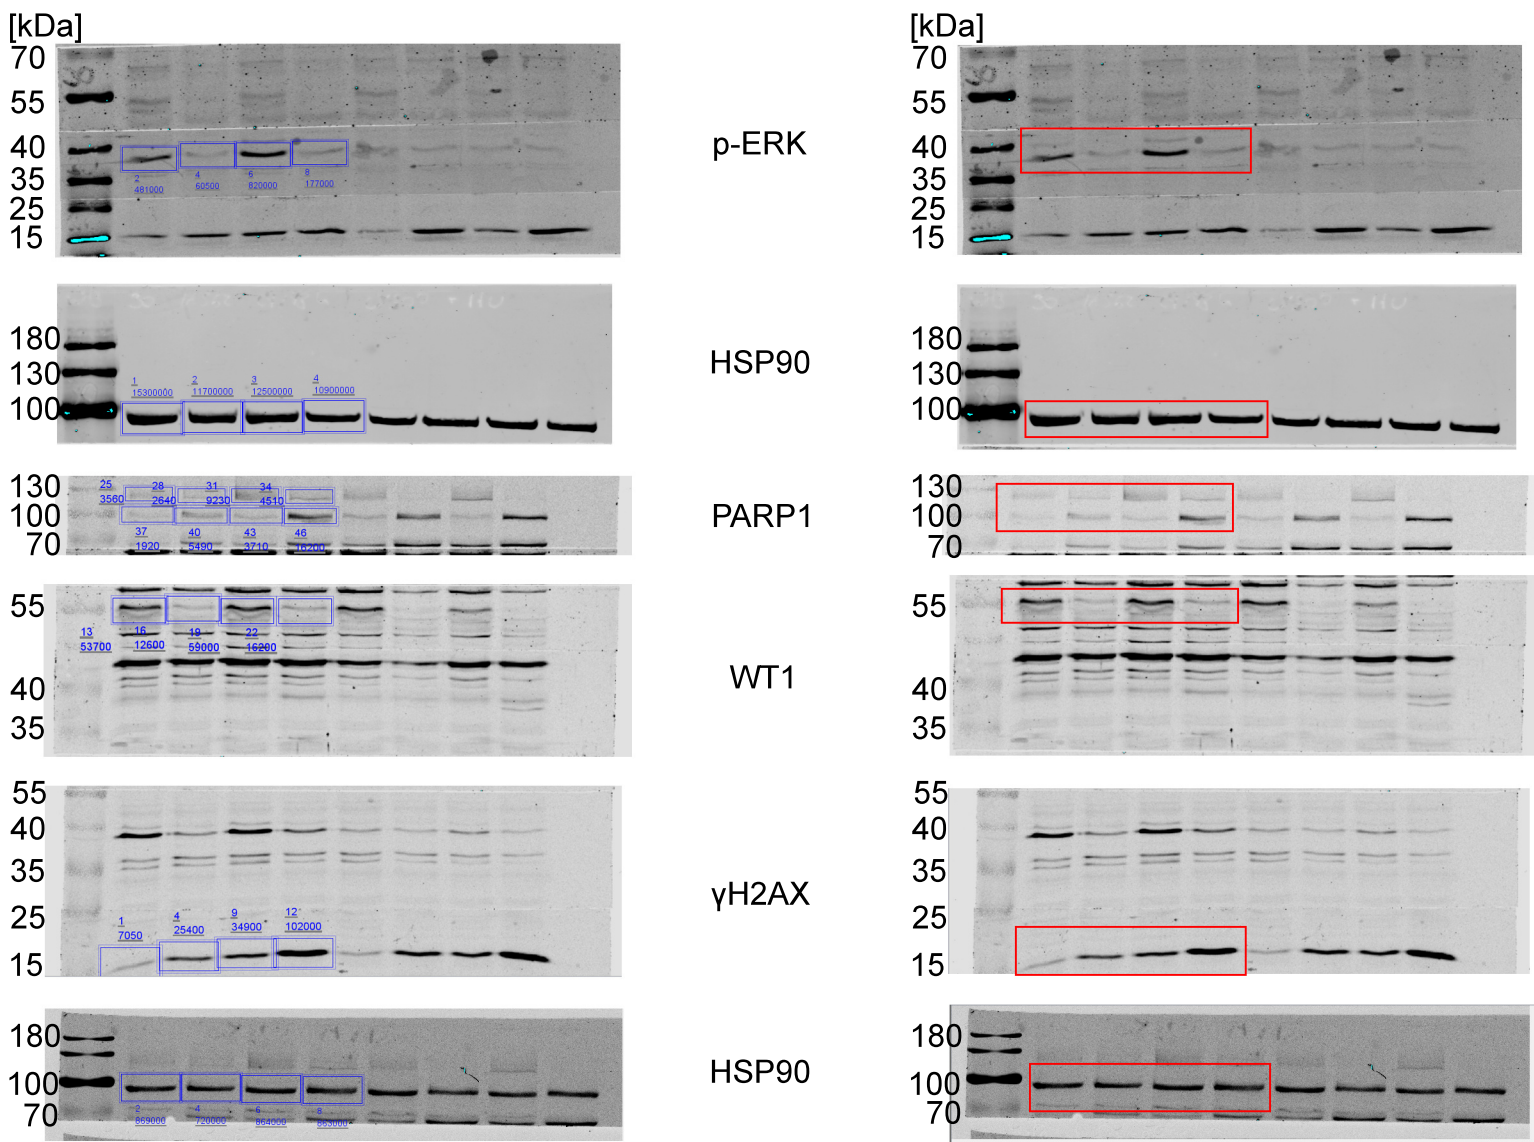

Figure 2A

| NB4            | p-ERK  |       | HSP90    |       | PARP1 - full lenth |       | PARP1 - cleaved form |       | WT1    |       | γH2AX  |       | HSP90  |       |
|----------------|--------|-------|----------|-------|--------------------|-------|----------------------|-------|--------|-------|--------|-------|--------|-------|
|                | Signal | Ratio | Signal   | Ratio | Signal             | Ratio | Signal               | Ratio | Signal | Ratio | Signal | Ratio | Signal | Ratio |
| con            | 481000 | 1,00  | 15300000 | 1,00  | 3560               | 1,00  | 1920                 | 1,00  | 53700  | 1,00  | 7050   | 1,00  | 869000 | 1,00  |
| 1 μM LY3009120 | 60500  | 0,13  | 11700000 | 0,76  | 2640               | 0,74  | 5490                 | 2,86  | 12600  | 0,23  | 25400  | 3,60  | 720000 | 0,83  |
| 1 mM HU        | 820000 | 1,70  | 12500000 | 0,82  | 9230               | 2,59  | 3710                 | 1,93  | 59000  | 1,10  | 34900  | 4,95  | 864000 | 0,99  |
| LY3009021 + HU | 177000 | 0,37  | 10900000 | 0,71  | 4510               | 1,27  | 16200                | 8,44  | 16200  | 0,30  | 102000 | 14,47 | 863000 | 0,99  |

Original microscopy images corresponding to Fig.2c

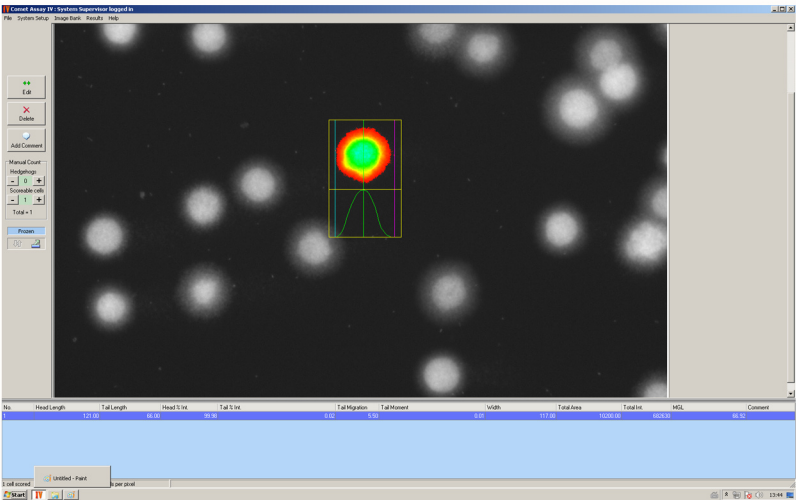

con

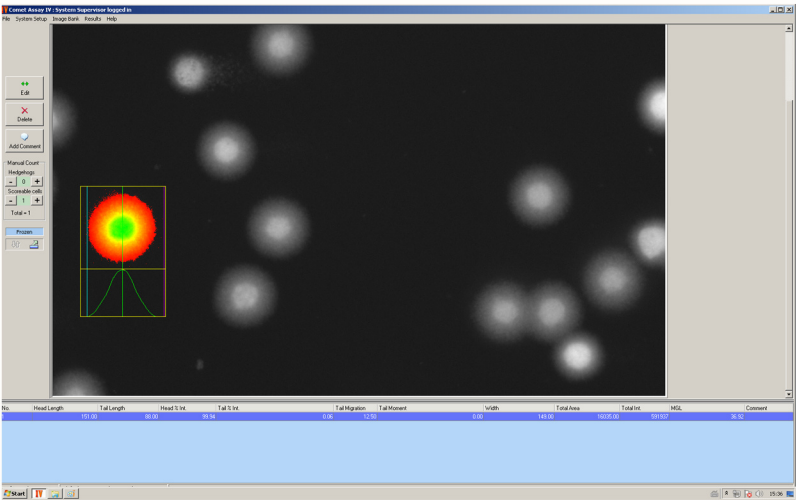

LY3009120

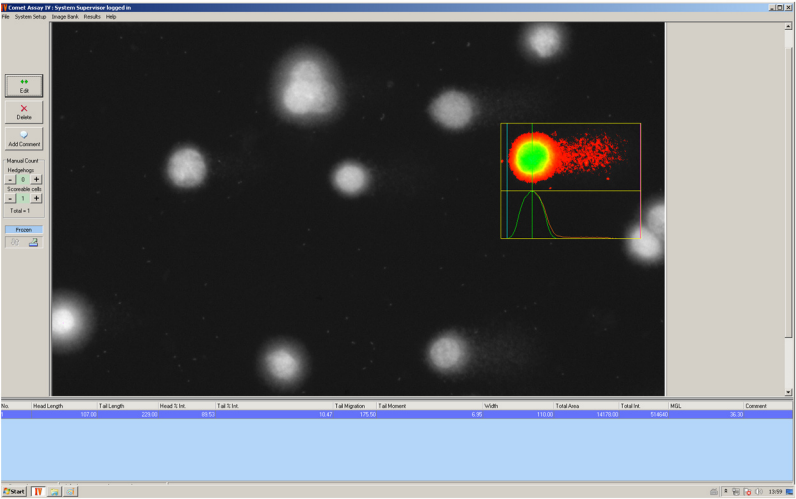

HU

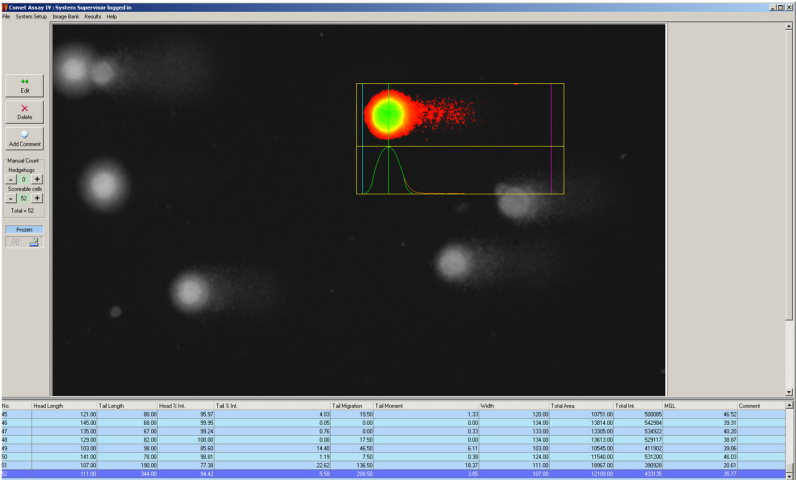

LY3009120+HU



### Original blots corresponding to Fig. 3A

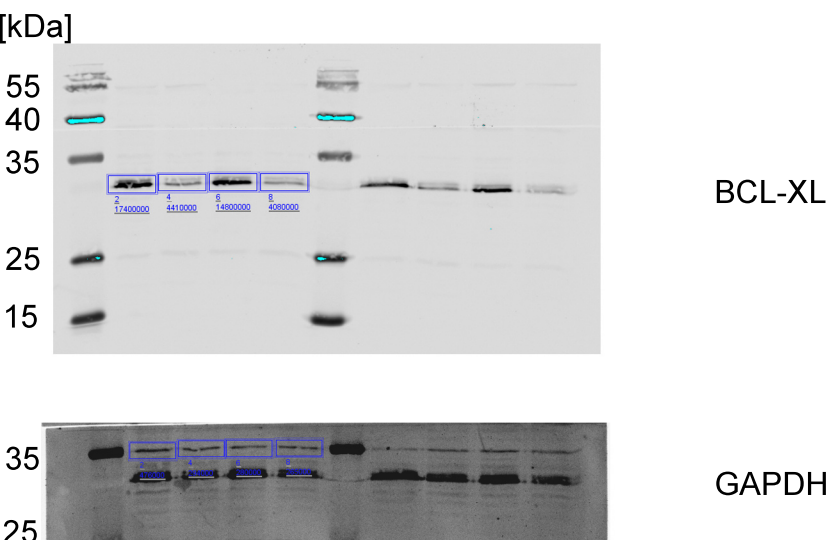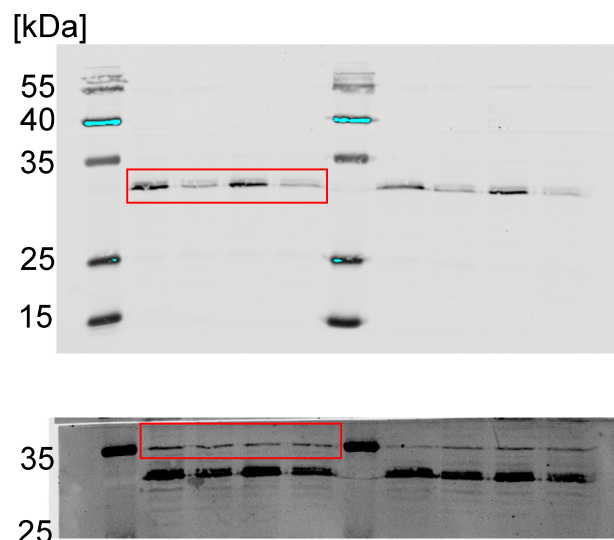

### Original blots corresponding to Fig. 3D

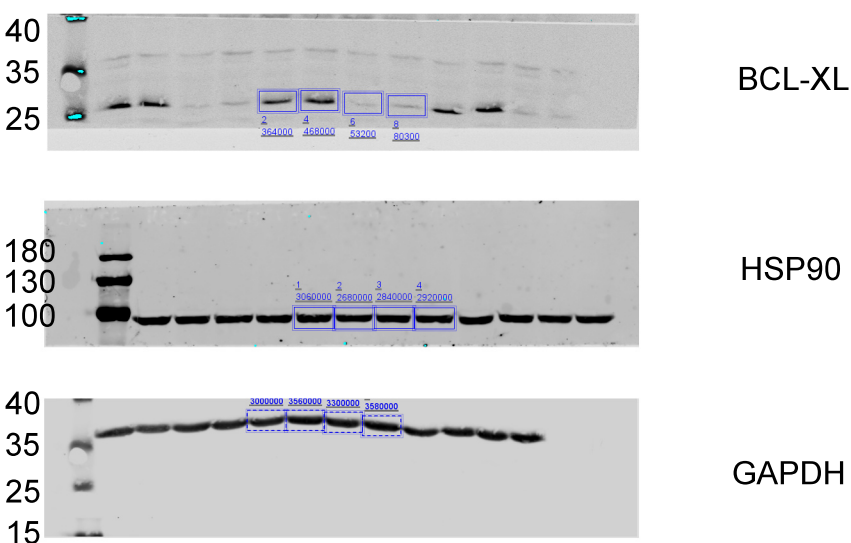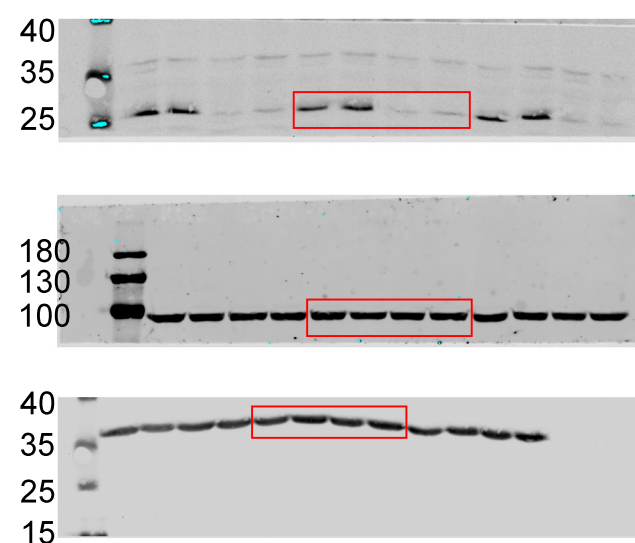

| Figure 3A           |          |       |         |       |         |       |
|---------------------|----------|-------|---------|-------|---------|-------|
|                     | BCL-XL   |       | GAPDH   |       |         |       |
|                     | Signal   | Ratio | Signal  | Ratio |         |       |
| con                 | 17400000 | 1,00  | 476000  | 1,00  |         |       |
| 1 $\mu$ M LY3009120 | 4410000  | 0,25  | 294000  | 0,62  |         |       |
| 1 mM HU             | 14800000 | 0,85  | 280000  | 0,59  |         |       |
| LY3009021 + HU      | 4080000  | 0,23  | 265000  | 0,56  |         |       |
| Figure 3D           |          |       |         |       |         |       |
|                     | BCL-XL   |       | HSP90   |       | GAPDH   |       |
|                     | Signal   | Ratio | Signal  | Ratio | Signal  | Ratio |
| siCon - Con         | 364000   | 1,00  | 3060000 | 1,00  | 3000000 | 1,00  |
| siCon - 1 mM HU     | 468000   | 1,29  | 2680000 | 0,88  | 3560000 | 1,19  |
| siBCL-XL - Con      | 53200    | 0,15  | 2840000 | 0,93  | 3300000 | 1,10  |
| siBCL-XL - 1 mM HU  | 80300    | 0,22  | 2920000 | 0,95  | 3580000 | 1,19  |

Original blots corresponding to Fig. 4A

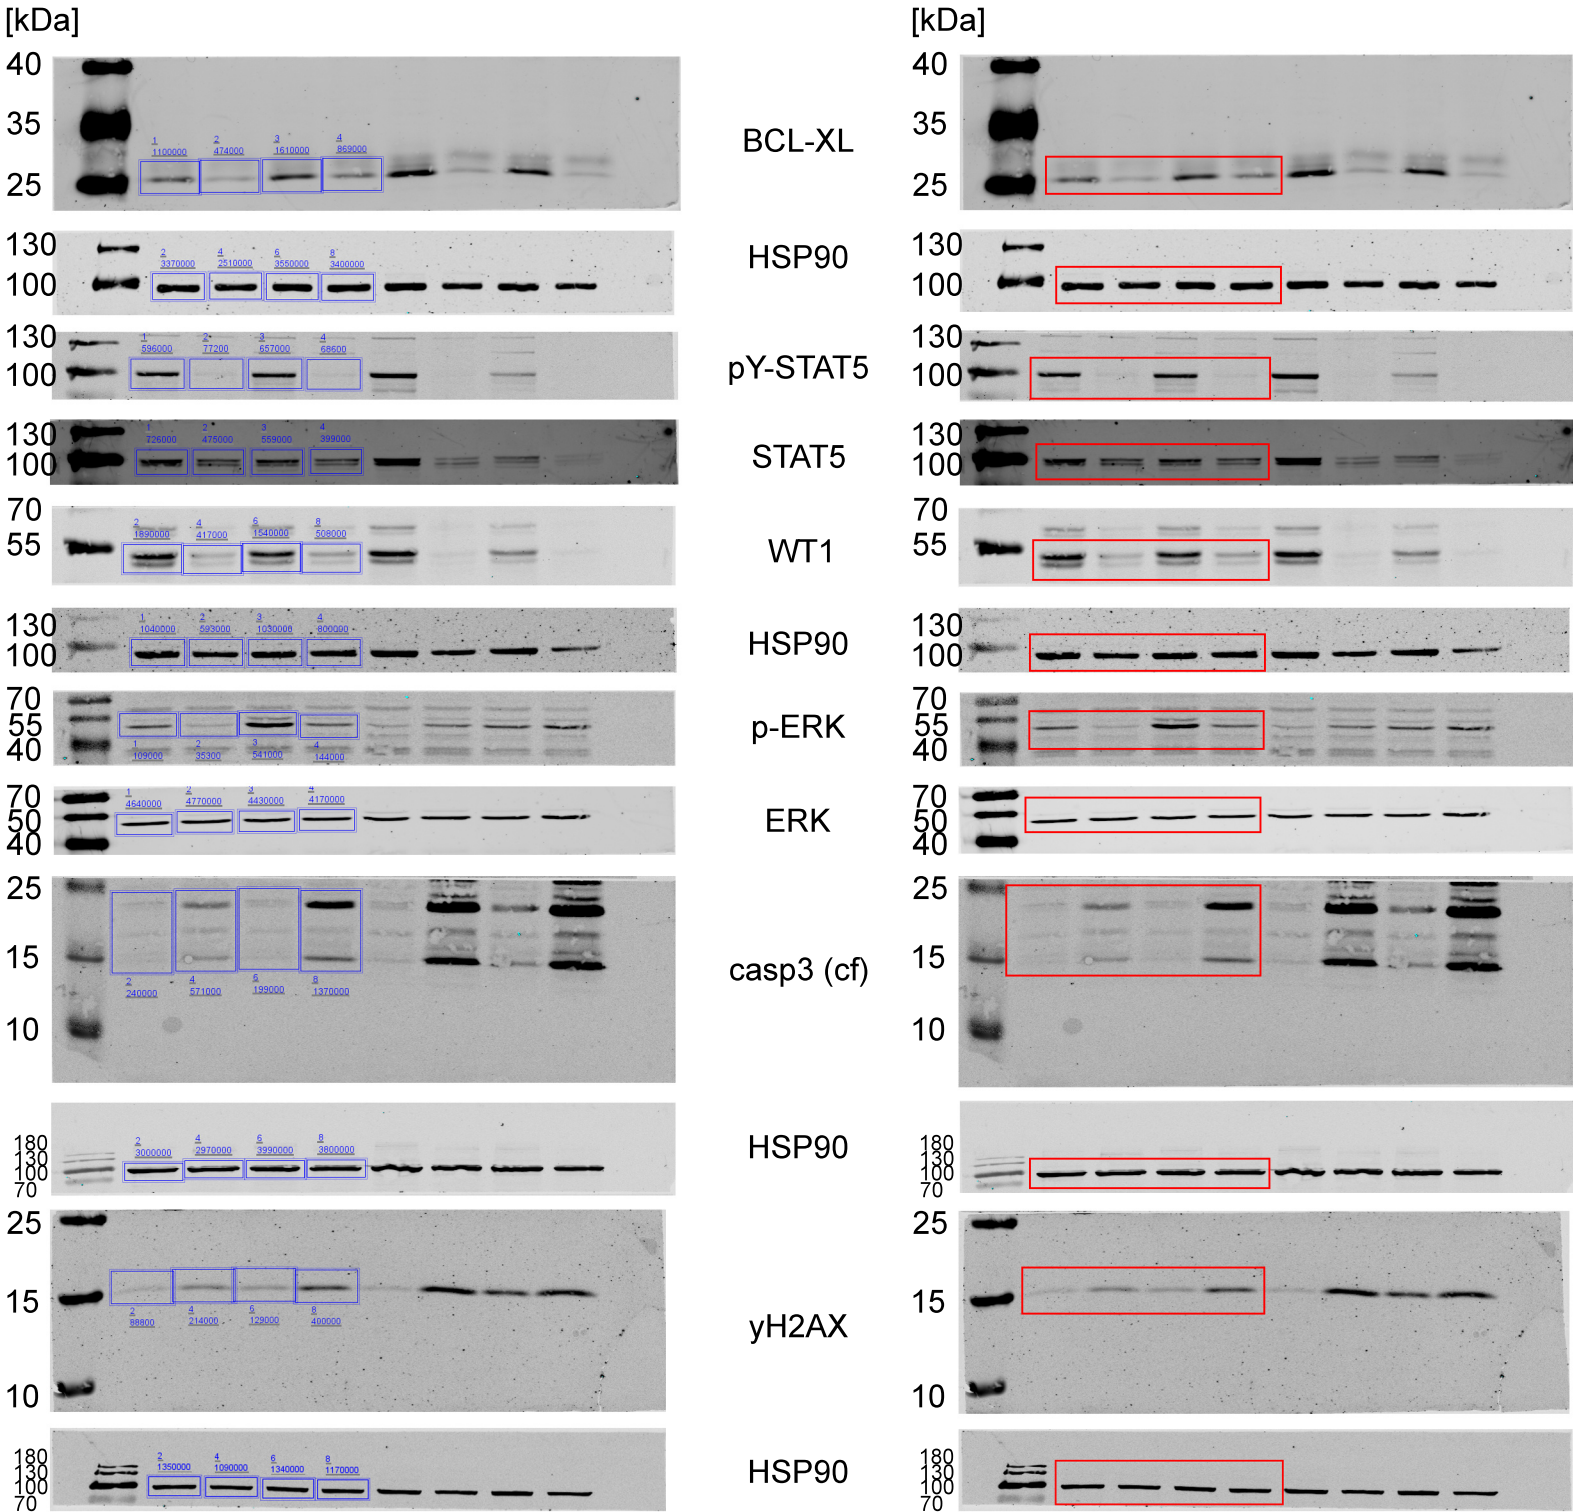

| Figure 4A     |         |       |         |       |          |       |        |       |         |       |         |       |
|---------------|---------|-------|---------|-------|----------|-------|--------|-------|---------|-------|---------|-------|
|               | BCL-XL  |       | HSP90   |       | pY-STAT5 |       | STAT5  |       | WT1     |       | HSP90   |       |
|               | Signal  | Ratio | Signal  | Ratio | Signal   | Ratio | Signal | Ratio | Signal  | Ratio | Signal  | Ratio |
| con           | 1100000 | 1,00  | 3370000 | 1,00  | 596000   | 1,00  | 726000 | 1,00  | 1890000 | 1,00  | 1040000 | 1,00  |
| 1 µM imatinib | 474000  | 0,43  | 2510000 | 0,74  | 77200    | 0,13  | 475000 | 0,65  | 417000  | 0,22  | 593000  | 0,57  |
| 1 mM HU       | 1610000 | 1,46  | 3550000 | 1,05  | 657000   | 1,10  | 559000 | 0,77  | 1540000 | 0,81  | 1030000 | 0,99  |
| imatinib + HU | 869000  | 0,79  | 3400000 | 1,01  | 68600    | 0,12  | 399000 | 0,55  | 508000  | 0,27  | 800000  | 0,77  |

|               | p-ERK  |       | ERK     |       | casp3 (cf) |       | HSP90   |       | yH2AX  |       | HSP90   |       |
|---------------|--------|-------|---------|-------|------------|-------|---------|-------|--------|-------|---------|-------|
|               | Signal | Ratio | Signal  | Ratio | Signal     | Ratio | Signal  | Ratio | Signal | Ratio | Signal  | Ratio |
| con           | 109000 | 1,00  | 4640000 | 1,00  | 240000     | 1,00  | 3000000 | 1,00  | 88800  | 1,00  | 1350000 | 1,00  |
| 1 µM imatinib | 35300  | 0,32  | 4770000 | 1,03  | 571000     | 2,38  | 2970000 | 0,99  | 214000 | 2,41  | 1090000 | 0,81  |
| 1 mM HU       | 541000 | 4,96  | 4430000 | 0,95  | 199000     | 0,83  | 3990000 | 1,33  | 129000 | 1,45  | 1340000 | 0,99  |
| imatinib + HU | 144000 | 1,32  | 4170000 | 0,90  | 1370000    | 5,71  | 3800000 | 1,27  | 400000 | 4,50  | 1170000 | 0,87  |

Original blots corresponding to Fig. 5A

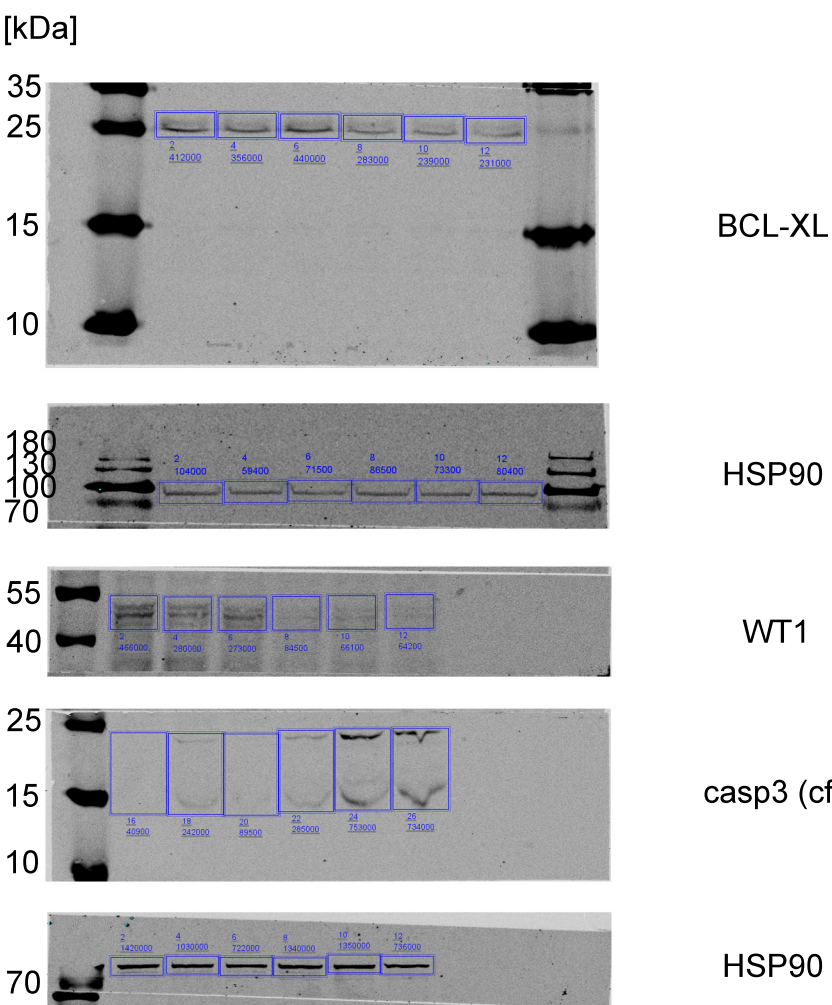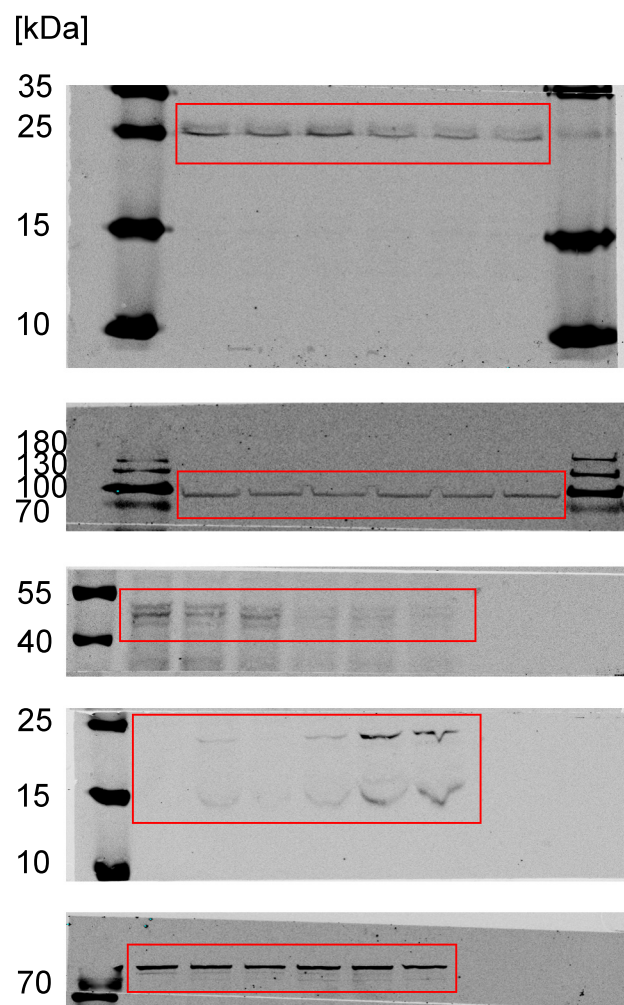

| Figure 5A             |        |       |        |       |        |       |            |       |         |       |
|-----------------------|--------|-------|--------|-------|--------|-------|------------|-------|---------|-------|
|                       | BCL-XL |       | HSP90  |       | WT1    |       | casp3 (cf) |       | HSP90   |       |
|                       | Signal | Ratio | Signal | Ratio | Signal | Ratio | Signal     | Ratio | Signal  | Ratio |
| con                   | 412000 | 1,00  | 104000 | 1,00  | 466000 | 1,00  | 40900      | 1,00  | 1420000 | 1,00  |
| 0.5 mM HU             | 356000 | 0,86  | 59400  | 0,57  | 280000 | 0,60  | 242000     | 5,92  | 1030000 | 0,73  |
| 0.5 µM LY3009120      | 440000 | 1,07  | 71500  | 0,69  | 273000 | 0,59  | 89500      | 2,19  | 722000  | 0,51  |
| 1 µM LY3009120        | 283000 | 0,69  | 86500  | 0,83  | 84500  | 0,18  | 285000     | 6,97  | 1340000 | 0,94  |
| HU + 0.5 µM LY3009120 | 239000 | 0,58  | 73300  | 0,70  | 66100  | 0,14  | 753000     | 18,41 | 1380000 | 0,97  |
| HU + 1 µM LY3009120   | 231000 | 0,56  | 80400  | 1,35  | 64200  | 0,14  | 734000     | 17,95 | 735000  | 0,52  |

Original blots corresponding to Fig. 6A

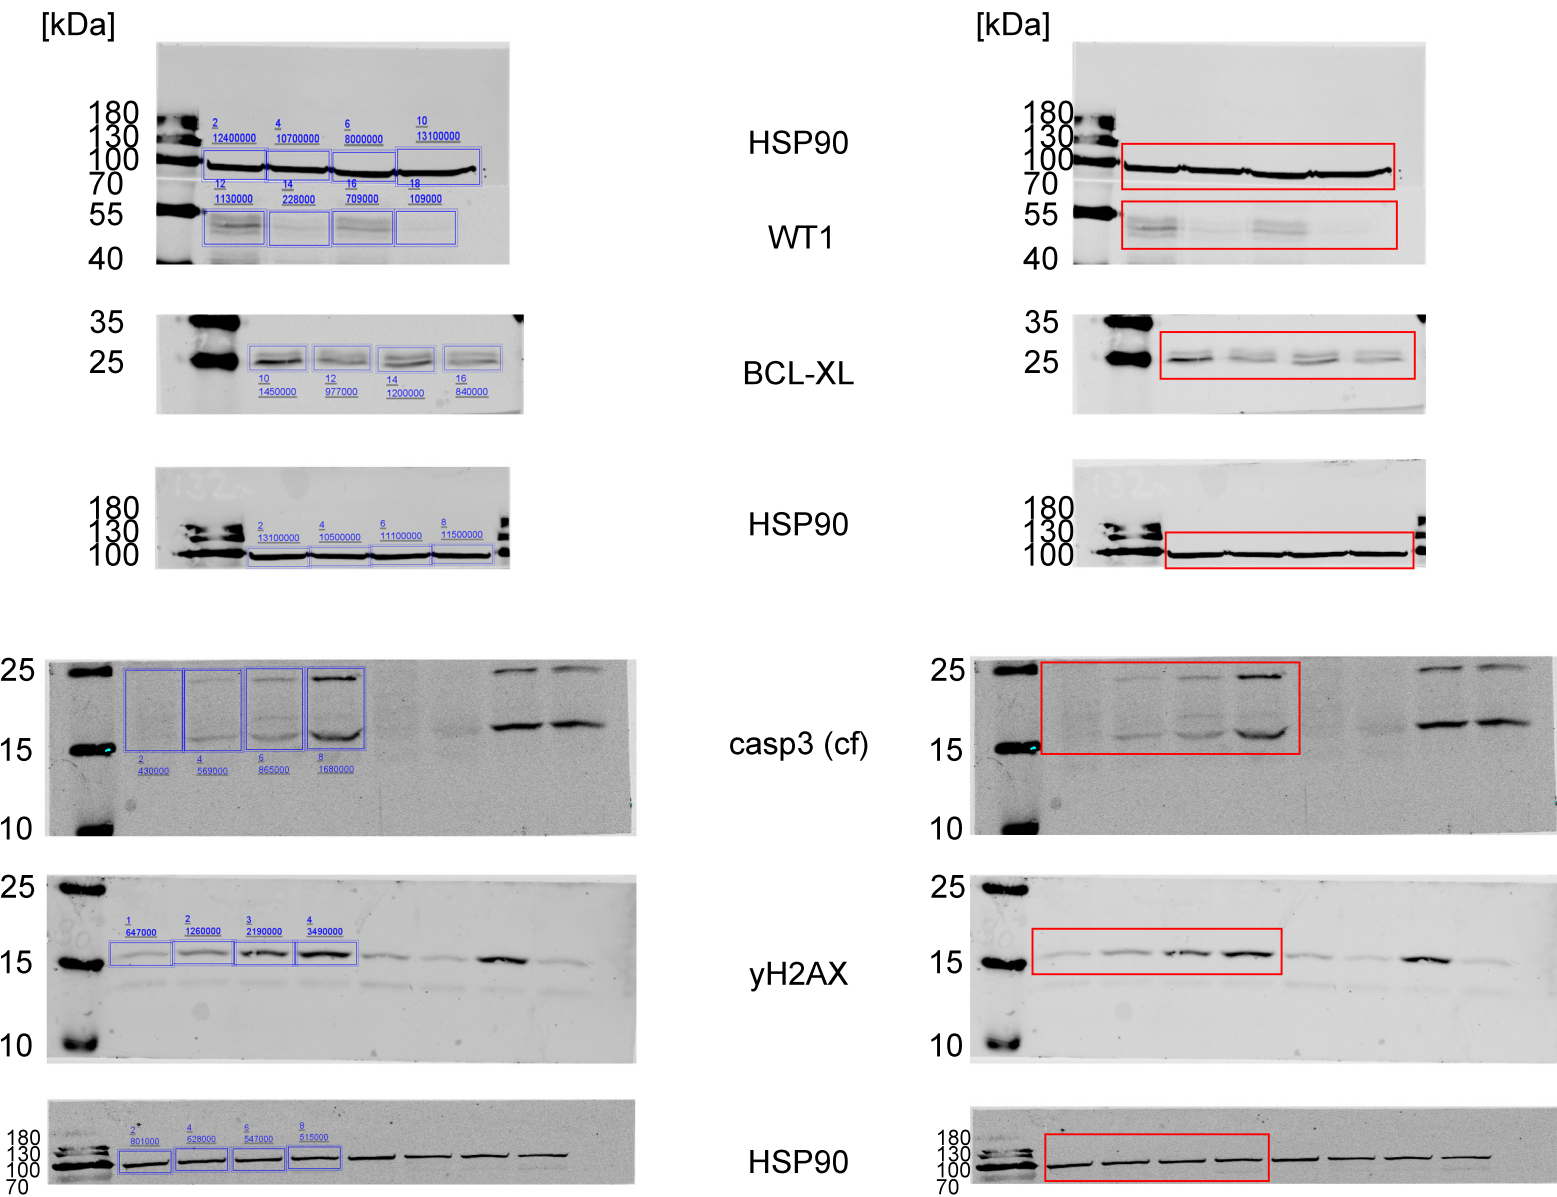

Figure 6A

|                  | WT1        |       | HSP90    |       | BCL-XL  |       | HSP90    |       |
|------------------|------------|-------|----------|-------|---------|-------|----------|-------|
|                  | Signal     | Ratio | Signal   | Ratio | Signal  | Ratio | Signal   | Ratio |
| con              | 1130000    | 1,00  | 12400000 | 1,00  | 1450000 | 1,00  | 13100000 | 1,00  |
| 2 nM quizartinib | 228000     | 0,20  | 10700000 | 0,86  | 977000  | 0,67  | 10500000 | 0,80  |
| 0.5 mM HU        | 709000     | 0,63  | 8000000  | 0,65  | 1200000 | 0,83  | 11100000 | 0,85  |
| quizartinib + HU | 109000     | 0,10  | 13100000 | 1,06  | 840000  | 0,58  | 11500000 | 0,88  |
|                  | casp3 (cf) |       | yH2AX    |       | HSP90   |       |          |       |
|                  | Signal     | Ratio | Signal   | Ratio | Signal  | Ratio |          |       |
| con              | 430000     | 1,00  | 647000   | 1,00  | 801000  | 1,00  |          |       |
| 2 nM quizartinib | 569000     | 1,32  | 1260000  | 1,95  | 628000  | 0,78  |          |       |
| 0.5 mM HU        | 865000     | 2,01  | 2190000  | 3,38  | 547000  | 0,68  |          |       |
| quizartinib + HU | 1680000    | 3,91  | 3490000  | 5,39  | 515000  | 0,64  |          |       |

Original blots corresponding to Fig. 7A

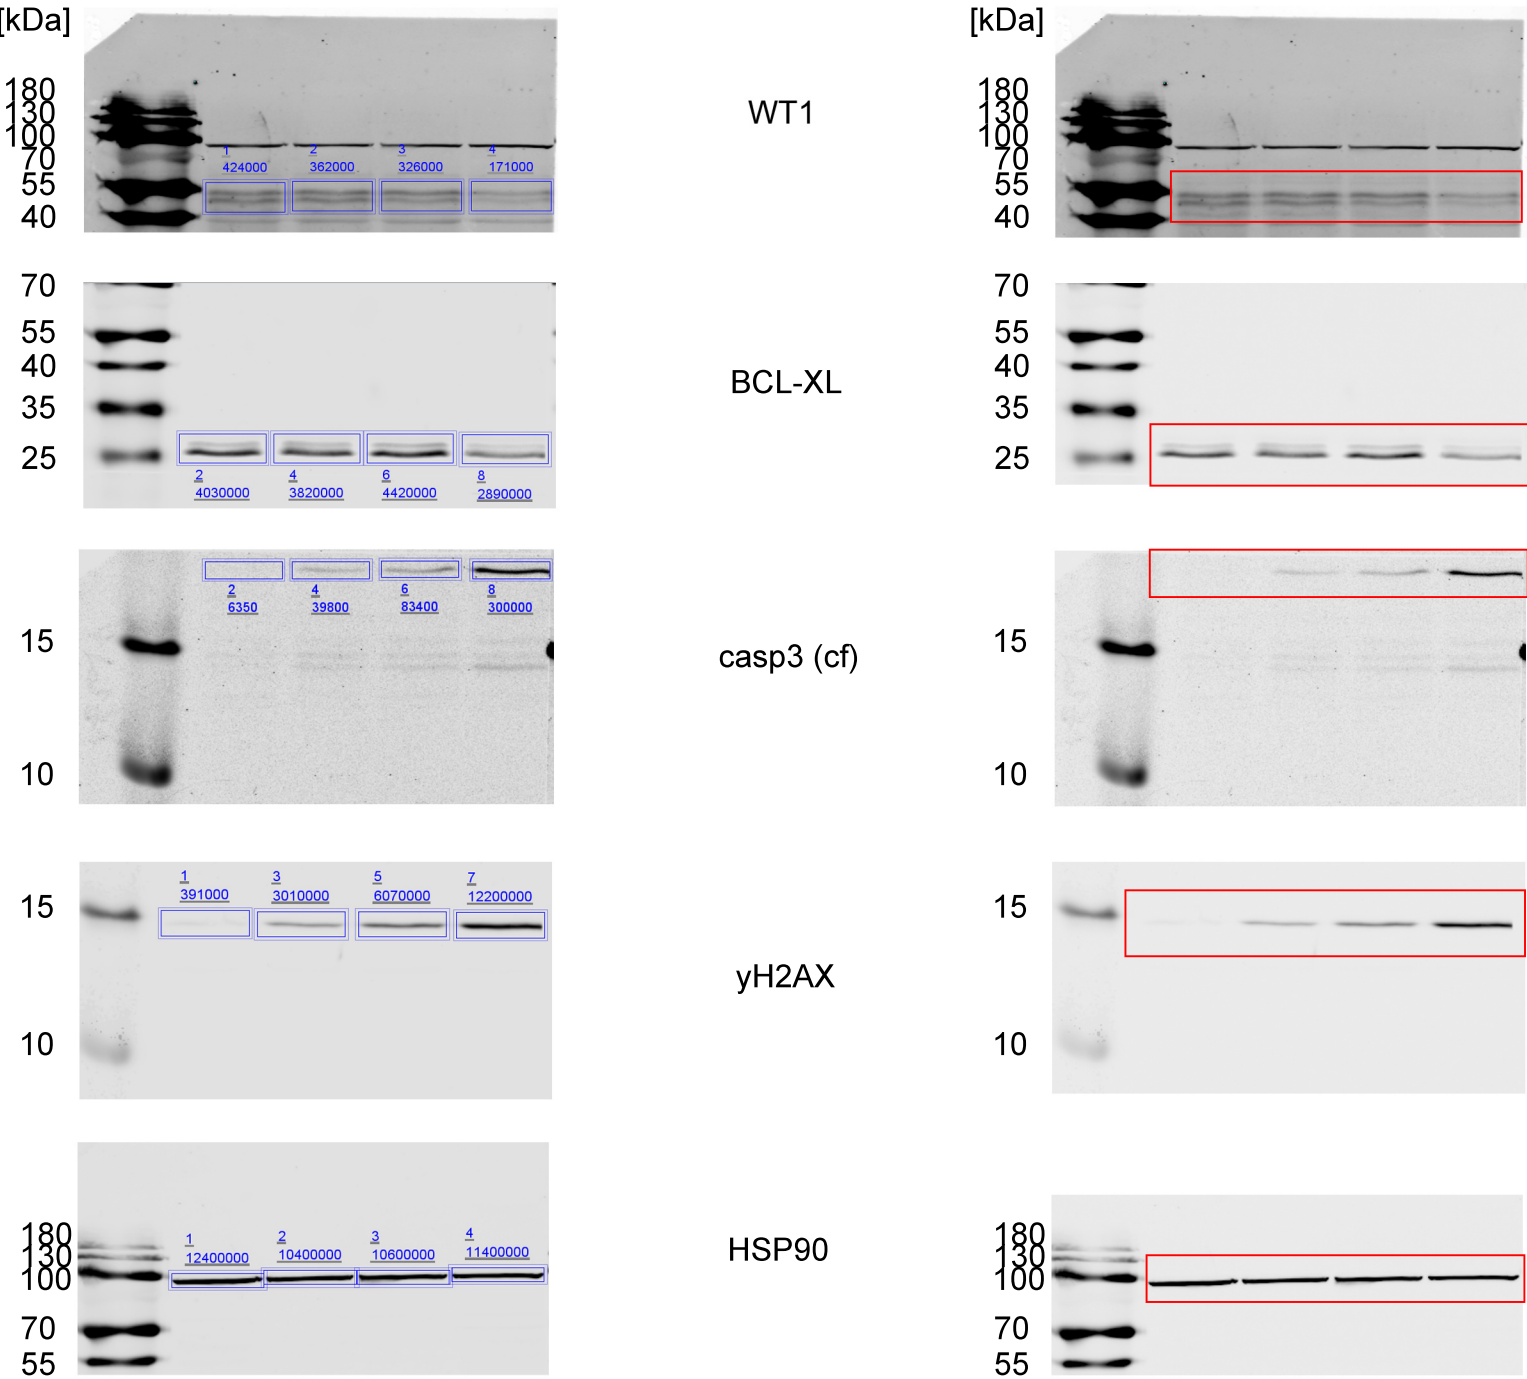

| Figure 7A                     |        |       |         |       |            |       |          |       |          |       |
|-------------------------------|--------|-------|---------|-------|------------|-------|----------|-------|----------|-------|
| MV4-11                        | WT1    |       | BCL-XL  |       | casp3 (cf) |       | yH2AX    |       | HSP90    |       |
|                               | Signal | Ratio | Signal  | Ratio | Signal     | Ratio | Signal   | Ratio | Signal   | Ratio |
| con                           | 424000 | 1,00  | 4030000 | 1,00  | 6350       | 1,00  | 391000   | 1,00  | 12400000 | 1,00  |
| 0.5 mM HU                     | 362000 | 0,85  | 3820000 | 0,95  | 39800      | 6,27  | 3010000  | 7,70  | 10400000 | 0,84  |
| 0.5 uM Navitoclax             | 326000 | 0,77  | 4420000 | 1,10  | 83400      | 13,13 | 6070000  | 15,52 | 10600000 | 0,85  |
| 0.5 mM HU + 0.5 uM Navitoclax | 171000 | 0,40  | 2890000 | 0,72  | 300000     | 47,24 | 12200000 | 31,20 | 11400000 | 0,92  |
