# Supplementary material for: Oncogenic Kinase Cascades Induce Molecular Mechanisms That Protect Leukemic Cell Models from Lethal Effects of De Novo dNTP Synthesis Inhibition
Source: Cancers (Basel). 2021 Jul 10;13(14):3464. doi: 10.3390/cancers13143464 (PMC8304262; doi:10.3390/cancers13143464)
Supplement: Supplementary file 1 [file cancers-13-03464-s001.zip › Supplementary Table.xlsx]

## Sheet: Proteomics - NB4 - HU 
Protein IDs	Protein names	Gene names	LFQ intensity NB24h_1	LFQ intensity Nbcont_5	LFQ intensity NB24h_1	LFQ intensity Nbcont_5
Q9UBX3;Q9UBX3-2;B4E1E9	Mitochondrial dicarboxylate carrier	SLC25A10	20408000	0	24.2826	#NUM!
A6NKT7;Q7Z3J3;C9JX22;F8VYC4;E7ESF1;P0DJD0;P0DJD1;B4DZH4;E7ES93;B4DTM4;H0YGG1		RGPD3;RGPD4;RGPD1;RGPD2	39385000	0	25.2311	#NUM!
C9J1W7;O95104;C9JD39;O95104-2;C9JLZ0	Splicing factor, arginine/serine-rich 15	SCAF4	48200000	305860000	25.5225	28.1883
P56556	NADH dehydrogenase [ubiquinone] 1 alpha subcomplex subunit 6	NDUFA6	51238000	0	25.6107	#NUM!
P35613-2;P35613;A8MZ77	Basigin	BSG	55069000	0	25.7147	#NUM!
O95239;O95239-2;F5H4Q9;Q2VIQ3;Q5JRK0;E9PG57;Q05CT3;E2QRG3;H0Y718;F6VGH2;E7EUN7;Q6ZMV9-3;Q6ZMV9	Chromosome-associated kinesin KIF4A	KIF4A	60828000	489960000	25.8582	28.8681
Q9Y3C4;Q9Y3C4-3;Q9Y3C4-2	EKC/KEOPS complex subunit TPRKB	TPRKB	61938000	353130000	25.8843	28.3956
P13984	General transcription factor IIF subunit 2	GTF2F2	62382000	152850000	25.8946	27.1875
P53680;P53680-2	AP-2 complex subunit sigma	AP2S1	63827000	1159800000	25.9277	30.1112
O75380;D6RBT3	NADH dehydrogenase [ubiquinone] iron-sulfur protein 6, mitochondrial	NDUFS6	63835000	78162000	25.9278	26.22
B4E0V0;B4E1D7;Q9NVS9;B4E152	Pyridoxine-5-phosphate oxidase	PNPO	64251000	82771000	25.9372	26.3026
Q9Y508;C9JU49;Q9Y508-2;E9PGC2	E3 ubiquitin-protein ligase RNF114	RNF114	65507000	650760000	25.9651	29.2776
E9PKP7;P17480-2;P17480;E9PMM2;E9PLT2;H0YDH7	Nucleolar transcription factor 1	UBTF	65537000	588020000	25.9658	29.1313
Q69YN2;Q69YN2-3;Q69YN2-2	CWF19-like protein 1	CWF19L1	66191000	276150000	25.9801	28.0409
Q8TCE6-2;Q8TCE6;Q6NSW5;B4DMU4;B4DDW8;F5H7K0	Protein FAM45A;Protein FAM45B	FAM45A;FAM45B	68805000	334470000	26.036	28.3173
P49711;B5MC38;E9PD18;A6XGN1;A6XGN3;A6XGN0;Q8NI51;A6XGM2;A6XGL8;F5H2V8;E7EUE3;A6XGM3;A6XGM8	Transcriptional repressor CTCF	CTCF	69270000	135750000	26.0457	27.0164
Q7Z7E8;C9JX13;Q7Z7E8-2;Q8WVN8-2;Q8WVN8	Ubiquitin-conjugating enzyme E2 Q1	UBE2Q1	70982000	0	26.0809	#NUM!
Q7L5N7;Q7L5N7-2	Lysophosphatidylcholine acyltransferase 2	LPCAT2	75070000	965290000	26.1617	29.8464
Q8IU81	Interferon regulatory factor 2-binding protein 1	IRF2BP1	76119000	1064100000	26.1818	29.987
Q9UNZ2;Q9UNZ2-5;Q9UNZ2-6;Q9UNZ2-4;F2Z2K0	NSFL1 cofactor p47	NSFL1C	77163000	1201400000	26.2014	30.1621
P60604;A6NMQ7;F8WCB9;F8WDB1	Ubiquitin-conjugating enzyme E2 G2	UBE2G2	79805000	515460000	26.25	28.9413
O95218-2;O95218	Zinc finger Ran-binding domain-containing protein 2	ZRANB2	86311000	0	26.363	#NUM!
O43290;G3V1T2;E9PQI8	U4/U6.U5 tri-snRNP-associated protein 1	SART1	86828000	2106900000	26.3717	30.9725
Q6UB99	Ankyrin repeat domain-containing protein 11	ANKRD11	87252000	0	26.3787	#NUM!
A6NFM2;P32322;B4DMU0;E2QRB3	Pyrroline-5-carboxylate reductase 1, mitochondrial	PYCR1	87420000	0	26.3815	#NUM!
Q86YP4;B5MC40;Q86YP4-2;B4DKZ7;F5H7D9;C9JVY3;C9JMI3;C9JGN4;C9JHD7;C9JJK9	Transcriptional repressor p66-alpha	GATAD2A	87518000	1446100000	26.3831	30.4295
E9PDD5;P51553;E7EQB8;G5E9Q7;E9PF84;E9PCL6;H0Y5Q7	Isocitrate dehydrogenase [NAD] subunit gamma, mitochondrial	IDH3G	88418000	0	26.3978	#NUM!
O75940	Survival of motor neuron-related-splicing factor 30	SMNDC1	90129000	1459200000	26.4255	30.4425
Q92609;C9JP52;C9J3F6;C9JDR8;C9K0P2;C9J397;C9JWX0;C9JW04;C9JMP7;C9JIU4;F2Z3I5;C9JNM0;C9JED7;F2Z3C3	TBC1 domain family member 5	TBC1D5	92204000	0	26.4583	#NUM!
P53701	Cytochrome c-type heme lyase	HCCS	92256000	394280000	26.4591	28.5546
P50402;Q5HY57;F8WEQ1	Emerin	EMD	92514000	213540000	26.4632	27.6699
C9JN15;Q32LZ0;E9PG73;Q13427-2;Q13427;C9JM79;C9JT64;C9J679	Peptidyl-prolyl cis-trans isomerase;Peptidyl-prolyl cis-trans isomerase G	PPIG	95144000	841760000	26.5036	29.6488
O15427	Monocarboxylate transporter 4	SLC16A3	95552000	1829100000	26.5098	30.7685
O60313-2;E5KLJ5;E5KLK1;E5KLJ9;O60313;E5KLJ6;C9JMB8;C9JY58;A8MXB6	Dynamin-like 120 kDa protein, mitochondrial;Dynamin-like 120 kDa protein, form S1	OPA1	96333000	2943300000	26.5215	31.4548
O43665-2;O43665;O43665-3	Regulator of G-protein signaling 10	RGS10	96397000	778090000	26.5225	29.5354
Q9UBS4	DnaJ homolog subfamily B member 11	DNAJB11	99637000	884730000	26.5702	29.7207
Q9HCU5;B5MC98;F8WCS5	Prolactin regulatory element-binding protein	PREB	100840000	251320000	26.5875	27.905
E9PD53;Q9NTJ3;Q9NTJ3-2;F5H0U7;E7ET04;C9JR83;C9J9E4;C9JVD8;C9J578;C9JWF0;C9IYK2;C9JJ64	Structural maintece of chromosomes protein;Structural maintece of chromosomes protein 4	SMC4	100960000	439420000	26.5892	28.711
Q9BXK5-2;Q9BXK5;E9PDD6;F2Z2C3;H0Y3R5;B7Z238	Bcl-2-like protein 13	BCL2L13	102430000	0	26.6101	#NUM!
P49005;F8W8R3;C9JLE1;C9J8Z7;C9IZD2;C9JHC7	DNA polymerase delta subunit 2	POLD2	102660000	1108000000	26.6133	30.0453
P10644;C9JSK5;Q6NS41	cAMP-dependent protein kinase type I-alpha regulatory subunit;cAMP-dependent protein kinase type I-alpha regulatory subunit, N-terminally processed	PRKAR1A	103260000	1457100000	26.6217	30.4405
B4DKD5;Q7Z6M4;C9JX74;B5MBW3;C9JNJ7;E7EW93	Transcription termination factor 4, mitochondrial;mTERF domain-containing protein 2 processed	MTERF4	104200000	0	26.6348	#NUM!
Q9Y5L4	Mitochondrial import inner membrane translocase subunit Tim13	TIMM13	104240000	240850000	26.6353	27.8436
F8W7D8			104290000	0	26.636	#NUM!
Q9H223	EH domain-containing protein 4	EHD4	107960000	678240000	26.6859	29.3372
Q12904;Q12904-2;B4DNK3;D6R937	Aminoacyl tRNA synthase complex-interacting multifunctional protein 1;Endothelial monocyte-activating polypeptide 2	AIMP1	108200000	2413700000	26.6891	31.1686
B4DT35;Q7Z3B4;E7EUM5;Q7Z3B4-2	Nucleoporin p54	NUP54	108580000	433350000	26.6942	28.691
A6PW79;Q8N884;Q8N884-2	Cyclic GMP-AMP synthase	MB21D1	114100000	271350000	26.7657	28.0156
Q99615;Q7Z784	DnaJ homolog subfamily C member 7	DNAJC7	115660000	797400000	26.7853	29.5707
Q7Z5L9-2;Q7Z5L9;Q7Z5L9-3	Interferon regulatory factor 2-binding protein 2	IRF2BP2	116970000	764310000	26.8016	29.5096
B4DNR3;Q96IU4;F8W9U3;B4DQI4;Q96IU4-2	Alpha/beta hydrolase domain-containing protein 14B	ABHD14B	118080000	441220000	26.8152	28.7169
B4DKQ0;O75995	SAM and SH3 domain-containing protein 3	SASH3	118240000	0	26.8171	#NUM!
O43488;C9JSL3;F8W7D9;Q8NHP1;O95154	Aflatoxin B1 aldehyde reductase member 2	AKR7A2	122150000	496370000	26.8641	28.8868
Q6UW68	Transmembrane protein 205	TMEM205	122750000	0	26.8711	#NUM!
P05204;Q15651-2;Q15651	Non-histone chromosomal protein HMG-17;High mobility group nucleosome-binding domain-containing protein 3	HMGN2;HMGN3	124260000	0	26.8888	#NUM!
Q9UPY3;E0AD28;B3KRG4;H0YJZ6	Endoribonuclease Dicer	DICER1	125460000	692010000	26.9027	29.3662
Q9P015;E5RHF4;E5RIZ4	39S ribosomal protein L15, mitochondrial	MRPL15	127850000	186390000	26.9299	27.4737
P50749;G8JLC1;H0Y3B1;Q9H2L5-3;Q9H2L5;Q9H2L5-2	Ras association domain-containing protein 2	RASSF2	127920000	650380000	26.9307	29.2767
Q2TAM5;E9PKH5;B4E082;Q04206-2;Q04206-3;Q04206;Q04206-4;E9PI38;E9PQS6;E9PKV4;Q96CP1;H0YCB4;E9PJR1;E9PRX2;E9PNV4;E9PMD5	Transcription factor p65	RELA	130700000	472150000	26.9617	28.8147
Q53FT3;E9PPG8;E9PJB2;E9PBT4	Protein Hikeshi	C11orf73	132440000	0	26.9808	#NUM!
Q9BVQ7-2;Q9BVQ7;Q9BVQ7-3;H0YCA5	Spermatogenesis-associated protein 5-like protein 1	SPATA5L1	132860000	404630000	26.9853	28.592
O75530-3;O75530;O75530-2;E9PJK2;E9PL02;E9PMU3;H0YEL4;E9PR98;F5GY72	Polycomb protein EED	EED	133170000	797810000	26.9887	29.5715
Q9Y240;C9JXV2;E7EWX5	C-type lectin domain family 11 member A	CLEC11A	134490000	1927600000	27.0029	30.8442
O75569-3;O75569-2;O75569;F8WEG8;G5E9Q4;C9JMM3;B4DJC7	Interferon-inducible double-stranded RNA-dependent protein kinase activator A	PRKRA	134570000	1470500000	27.0038	30.4537
Q9GZY6;C9JA24;Q9GZY6-2;C9JXP0;C9JDY7;F8W947	Linker for activation of T-cells family member 2	LAT2	136240000	803570000	27.0216	29.5818
P28676;C9JIZ3;C9JWQ8	Grancalcin	GCA	136890000	408070000	27.0284	28.6042
Q8N183;D6RA56;H0YA50	Mimitin, mitochondrial	NDUFAF2	138260000	286230000	27.0428	28.0926
E7EVD1;O43395;B4DSY9	U4/U6 small nuclear ribonucleoprotein Prp3	PRPF3	139070000	0	27.0512	#NUM!
P62312	U6 snRNA-associated Sm-like protein LSm6	LSM6	139900000	0	27.0598	#NUM!
Q9HB07;F8VR84;F8VXF6;F8VQQ3;F5H641	UPF0160 protein MYG1, mitochondrial	C12orf10	139950000	724910000	27.0603	29.4332
O60869-2;O60869	Endothelial differentiation-related factor 1	EDF1	141360000	0	27.0748	#NUM!
O00471;F8W9B8	Exocyst complex component 5	EXOC5	142520000	424050000	27.0866	28.6597
Q9Y5Z4;Q9Y5Z4-2;Q5THN1;C9IZA0	Heme-binding protein 2	HEBP2	143270000	0	27.0942	#NUM!
Q7KZN9-2;Q7KZN9	Cytochrome c oxidase assembly protein COX15 homolog	COX15	143420000	157620000	27.0957	27.2319
Q01780;Q01780-2;B4DKG8	Exosome component 10	EXOSC10	143550000	4218200000	27.097	31.974
F5GXG0;Q96T88;B5ME40	E3 ubiquitin-protein ligase UHRF1	UHRF1	144140000	1416000000	27.1029	30.3992
Q9Y3C8	Ubiquitin-fold modifier-conjugating enzyme 1	UFC1	144290000	444800000	27.1044	28.7286
Q9Y6M0-3;Q9Y6M0-2;Q9Y6M0;Q7RTY9	Testisin	PRSS21	145420000	91495000	27.1157	26.4472
F5GWE5;Q00169;F5GWC2	Phosphatidylinositol transfer protein alpha isoform	PITPNA	146880000	0	27.1301	#NUM!
O95864;O95864-3;B7Z634;O95864-2;E5RGZ5;E5RGD8	Fatty acid desaturase 2	FADS2	146930000	296050000	27.1306	28.1413
O00139-2;O00139-1;E9PB70;O00139;O00139-4;D6R9M0;H0Y8H2	Kinesin-like protein KIF2A	KIF2A	146950000	953170000	27.1308	29.8282
B4DYB4;Q8NFH5;B4DP57;C9IYQ7;F8WCF5;F8WEL4;C9JIY9;C9JWU7	Nucleoporin NUP53	NUP35	147450000	320420000	27.1357	28.2554
P61006;F5GY21;H0YMN7;H0YLJ8;H0YL94;P20337;Q96E17	Ras-related protein Rab-8A	RAB8A	150460000	545030000	27.1648	29.0218
O75369-2;Q60FE7;O75369;B2ZZ83;O75369-6;O75369-3;E7EN95;O75369-7;O75369-5;O75369-4;Q8WXT3	Filamin-B	FLNB	152100000	2751900000	27.1804	31.3578
Q01813;H0Y3P8;Q5VSR7;B1APP6;B1APP8;Q5VSR5;H0Y757;Q5VSR6;H0Y3Y3	ATP-dependent 6-phosphofructokinase, platelet type	PFKP	152770000	2879400000	27.1868	31.4231
O94822;O94822-2	E3 ubiquitin-protein ligase listerin	LTN1	153400000	721660000	27.1927	29.4267
Q96DI7;B4DQJ1;Q9NSS8	U5 small nuclear ribonucleoprotein 40 kDa protein	SNRNP40	154290000	800100000	27.2011	29.5756
P40222;Q8N3L3	Alpha-taxilin	TXLNA	154450000	0	27.2026	#NUM!
P11413;P11413-2;P11413-3;E9PDV8;E9PD92	Glucose-6-phosphate 1-dehydrogenase	G6PD	154780000	1670400000	27.2056	30.6375
Q9H967;C9JE56	WD repeat-containing protein 76	WDR76	155200000	0	27.2096	#NUM!
O43169;D6RFH4	Cytochrome b5 type B	CYB5B	156680000	674300000	27.2232	29.3288
B1AKJ5;O43847;O43847-2;G3V1R5;F5H6R2;F5H7V1;H0Y5G9;E9PHF8	Nardilysin	NRD1	158110000	2084200000	27.2364	30.9568
Q92598-2;Q92598;Q92598-3;E7EUG1;B4DY72;F2Z3D7;Q5TBM3	Heat shock protein 105 kDa	HSPH1	161420000	0	27.2662	#NUM!
Q9Y2R9	28S ribosomal protein S7, mitochondrial	MRPS7	162040000	616260000	27.2718	29.199
Q9UFN0;Q9BS92	Protein NipSnap homolog 3A	NIPSNAP3A	162220000	409310000	27.2734	28.6086
Q9Y613;B4DVN5	FH1/FH2 domain-containing protein 1	FHOD1	162470000	898240000	27.2756	29.7425
Q5RKV6	Exosome complex component MTR3	EXOSC6	163250000	899570000	27.2825	29.7447
Q9P2E9;Q9P2E9-2;Q9P2E9-3;F8W7S5;A2A2S5;F8W6D3;Q8N4C6-6	Ribosome-binding protein 1	RRBP1	163310000	563100000	27.283	29.0688
F5H4M2;P54198;P54198-2;F5GWE4;F5GYH8	Protein HIRA	HIRA;C22orf39	165780000	0	27.3047	#NUM!
O60749;B4DEK4;D6RC15	Sorting nexin-2	SNX2	166030000	524920000	27.3069	28.9675
B4DNM1;Q96TA2-2;Q96TA2;Q96I63;F5GYR4;Q5T8D1;Q5T8D2	ATP-dependent zinc metalloprotease YME1L1	YME1L1	166130000	392820000	27.3077	28.5493
P62979	Ubiquitin-40S ribosomal protein S27a;Ubiquitin;40S ribosomal protein S27a	RPS27A	166320000	46123000	27.3094	25.459
Q92905;E5RHH5;E5RHF2;E5RFS1;E5RG35;E5RK55	COP9 signalosome complex subunit 5	COPS5	166630000	2227600000	27.3121	31.0528
Q13185;C9JMM0;B8ZZ43	Chromobox protein homolog 3	CBX3	167110000	427520000	27.3162	28.6714
P17096;P17096-3	High mobility group protein HMG-I/HMG-Y	HMGA1	167270000	171190000	27.3176	27.351
Q8N4H5;H0YFG9;F8W8Z9;Q5JRT7;F6S928	Mitochondrial import receptor subunit TOM5 homolog	TOMM5	169410000	200830000	27.3359	27.5814
Q9UEE9;Q9UEE9-2	Craniofacial development protein 1	CFDP1	169840000	279740000	27.3396	28.0595
C9JUK7;P16150	Leukosialin	SPN	171290000	125080000	27.3519	26.8983
E5RGS4;O60925;D6RGG5	Prefoldin subunit 1	PFDN1	171750000	0	27.3557	#NUM!
Q15022	Polycomb protein SUZ12	SUZ12	173680000	574020000	27.3719	29.0965
Q5SQP8;P56545;P56545-2	C-terminal-binding protein 2	CTBP2	173950000	722400000	27.3741	29.4282
O00264;B7Z1L3	Membrane-associated progesterone receptor component 1	PGRMC1	174210000	0	27.3763	#NUM!
A3KMH1-3;A3KMH1;E2QRD0;A3KMH1-2;A8MYW7;C9JBW2	von Willebrand factor A domain-containing protein 8	VWA8	181800000	334280000	27.4378	28.3165
Q9Y3A4;Q9NSQ0	Ribosomal RNA-processing protein 7 homolog A	RRP7A	181980000	2697000000	27.4392	31.3287
P15954;D6R9Z7	Cytochrome c oxidase subunit 7C, mitochondrial	COX7C	183950000	0	27.4547	#NUM!
Q9Y3B7;A6NLT0;Q9Y3B7-2;E9PQB6;H0YCD5	39S ribosomal protein L11, mitochondrial	MRPL11	184050000	1539800000	27.4555	30.5201
P04637-4;P04637;P04637-7;P04637-5;P04637-6;P04637-2;P04637-3;E7EQX7;E7ESS1;P04637-8;P04637-9;E7EMR6;E7ERV1;E9PFT5;E9PCY9	Cellular tumor antigen p53	TP53	184510000	109100000	27.4591	26.7011
Q58FG1	Putative heat shock protein HSP 90-alpha A4	HSP90AA4P	184600000	78437000	27.4598	26.225
P43034;B4DZN3;B4DF38;C9JJI8;P43034-2	Platelet-activating factor acetylhydrolase IB subunit alpha	PAFAH1B1	184850000	187860000	27.4618	27.4851
Q969V3-2;Q969V3	Nicalin	NCLN	185150000	1116600000	27.4641	30.0565
G3V556;P56378;G3V5Q3	6.8 kDa mitochondrial proteolipid	C14orf2;MP68	186880000	1052100000	27.4775	29.9706
Q13123;Q9H4P6;E7EQZ7;D6REL4;D6RAY9	Protein Red	IK	187160000	1685900000	27.4797	30.6509
Q96S44;Q5JZ02	TP53-regulating kinase	TP53RK	187730000	162090000	27.4841	27.2722
P16402	Histone H1.3	HIST1H1D	189970000	0	27.5012	#NUM!
Q9Y2T2;H0YBM0;H0YBA0;E7ER80;Q7Z472	AP-3 complex subunit mu-1	AP3M1	190170000	692090000	27.5027	29.3664
Q86YS7;Q86YS7-2;B4DRN7;F5H2A1;F5H5R1;F5H3N1;H0YFC4;H0YGJ3;H0YFE9	C2 domain-containing protein 5	C2CD5	191220000	699340000	27.5107	29.3814
P21281;H0YC04;B4DFM5;B4DQI9;E5RGH6;H0YAT8;C9J5E3;C9JNS9	V-type proton ATPase subunit B, brain isoform	ATP6V1B2	192260000	1106800000	27.5185	30.0437
Q7L2J0;D6W5V7	7SK snRNA methylphosphate capping enzyme	MEPCE	194060000	662190000	27.5319	29.3027
Q9H3P2;H0Y3X6;B3KSP0;C9JHL4;C9JEM7;Q9H3P2-7;F8W954;F8WF98	Negative elongation factor A	NELFA;WHSC2	197360000	1100500000	27.5563	30.0355
Q6UWY2	Serine protease 57	PRSS57	197570000	152520000	27.5578	27.1844
P32942	Intercellular adhesion molecule 3	ICAM3	199010000	1600000000	27.5683	30.5754
Q01469;A8MUU1	Fatty acid-binding protein, epidermal	FABP5	199550000	513450000	27.5722	28.9356
Q8WWM7;Q8WWM7-6;Q8WWM7-5;Q8WWM7-4;A8K1R6;Q8WWM7-2;Q8WWM7-3;C9JXV8	Ataxin-2-like protein	ATXN2L	200080000	538330000	27.576	29.0039
E5RJ68;O00203;F5GXG9;F5H093;Q13367;B7ZKS0;B7ZKR7;F5GWU4;F5GYB0;F5H0E6;H0YBD0	AP-3 complex subunit beta-1	AP3B1	201990000	1398600000	27.5897	30.3813
F8W031;F8VXJ7;Q9Y2B0;F8VP03;H0YIH9;F8W1U5;F8W1K5;Q9Y2B0-2;F8W0J2;H0YI18	Protein canopy homolog 2	CNPY2	202820000	920080000	27.5956	29.7772
Q9NPF2-2;Q9NPF2;F8VXK3;F8VRG6;F8VXK7	Carbohydrate sulfotransferase 11	CHST11	203240000	0	27.5986	#NUM!
F5H8I7;Q9Y5A9;Q9Y5A9-2	YTH domain-containing family protein 2	YTHDF2	204400000	799950000	27.6068	29.5753
Q9UKY7;Q9UKY7-2;D6R9V8;D6RFH2;H0Y8K3;Q9UKY7-3;D6RDN0;D6RAV0	Protein CDV3 homolog	CDV3	204850000	668190000	27.61	29.3157
P29590-11;P29590;H2N333;P29590-14;P29590-10;E9PBR7;P29590-4;P29590-12;P29590-2;P29590-5;P29590-9;P29590-13;P29590-3;P29590-8;F8W9X2	Protein PML	PML	207660000	912890000	27.6296	29.7659
Q71TU5;P48729;P48729-2;D6REM4;E7ETM0;Q8N752;H0Y9X2;E5RG27;D6RGE5	Casein kinase I isoform alpha;Casein kinase I isoform alpha-like	CSNK1A1;CSNK1A1L	207880000	965090000	27.6312	29.8461
Q5MIZ7-2;Q5MIZ7;Q5MIZ7-3;Q5MIZ7-5;Q5MIZ7-4	Serine/threonine-protein phosphatase 4 regulatory subunit 3B	SMEK2	208460000	0	27.6352	#NUM!
P51572;C9JMD7;C9JSP1;C9JQ75;C9J0M4;C9JM14	B-cell receptor-associated protein 31	BCAP31	209750000	221620000	27.6441	27.7235
Q12972;E7EVD4;Q12972-2;E9PEH7;Q12972-3	Nuclear inhibitor of protein phosphatase 1;Activator of RNA decay	PPP1R8	211630000	658940000	27.657	29.2956
P22612	cAMP-dependent protein kinase catalytic subunit gamma	PRKACG	214260000	0	27.6748	#NUM!
C9J0K6;B4DKK2;A8MTH6;P30626;B4DHQ6	Sorcin	SRI	215240000	204230000	27.6814	27.6056
Q8WWC4	Uncharacterized protein C2orf47, mitochondrial	C2orf47	217150000	0	27.6941	#NUM!
Q9BUB1;P13861;F5H1R5;P31323;C9J830	cAMP-dependent protein kinase type II-alpha regulatory subunit	PRKAR2A	219110000	288400000	27.7071	28.1035
Q8NBI5;E7EQD2;E9PS74;H0YD64	Solute carrier family 43 member 3	SLC43A3	219240000	0	27.7079	#NUM!
C9JW41;Q9NQ55-2;Q9NQ55;C9J3F9;A8MV53;C9J3W3;C9JHF7	Suppressor of SWI4 1 homolog	PPAN	219420000	1407000000	27.7091	30.39
Q9Y6N5	Sulfide:quinone oxidoreductase, mitochondrial	SQRDL	219650000	2163300000	27.7106	31.0106
O15173	Membrane-associated progesterone receptor component 2	PGRMC2	220270000	447340000	27.7147	28.7368
Q14444-2;Q14444;G3V153;E9PLA9;E9PEK6;E9PP31	Caprin-1	CAPRIN1	220730000	2052300000	27.7177	30.9346
E7ETA6;Q15154-2;Q15154;E7EV56;C9JGS5;C9JBL6;E9PGW9;E7EV93;H0YBA1;Q15154-3;E5RGQ4;A6NNN6;H0YAQ4	Pericentriolar material 1 protein	PCM1	221470000	711980000	27.7225	29.4073
O76071	Probable cytosolic iron-sulfur protein assembly protein CIAO1	CIAO1	222120000	863240000	27.7268	29.6852
Q9C0B1;B4DHN4;Q9C0B1-4;F8WCB8;Q9C0B1-2	Alpha-ketoglutarate-dependent dioxygenase FTO	FTO	222700000	788880000	27.7305	29.5552
A2A2Q9;Q9Y312	Protein AAR2 homolog	AAR2	223140000	479760000	27.7334	28.8377
Q96BS2;F5H1Y5;Q96BS2-2;E9PQ58;H0YIX4	Calcineurin B homologous protein 3	TESC	223900000	631020000	27.7383	29.2331
Q9BV40;B8ZZT4;C9JXZ5	Vesicle-associated membrane protein 8	VAMP8	227070000	0	27.7586	#NUM!
P52788;P52788-2;B4DE40	Spermine synthase	SMS	228950000	727990000	27.7705	29.4393
B0QYK0;B0QYK1;Q96FE8;Q01844;Q96MX4;C9JGE3;Q01844-2;F8WC90;Q9BWA2	RNA-binding protein EWS	EWSR1	230860000	239660000	27.7824	27.8364
C9JRZ6;Q9NX63;F8WAR4;G3V1K1;F8WD73	MICOS complex subunit MIC19	CHCHD3	231400000	111030000	27.7858	26.7264
P49753;B3KSA0;P49753-2	Acyl-coenzyme A thioesterase 2, mitochondrial	ACOT2	231790000	0	27.7882	#NUM!
P04839;F5GWD2;F5GWU5;Q5H9D4;Q9Y5S8-2;Q9Y5S8-3;Q9Y5S8	Cytochrome b-245 heavy chain	CYBB	232720000	1312400000	27.794	30.2896
Q9H2P0;E9PQK8	Activity-dependent neuroprotector homeobox protein	ADNP	233950000	1439600000	27.8016	30.423
Q92820;E5RGF0	Gamma-glutamyl hydrolase	GGH	235910000	533450000	27.8137	28.9908
B3KXW5;O43747;O43747-2;E7EUH1;F5GZV5;B4DGE1	AP-1 complex subunit gamma-1	AP1G1	237970000	2715600000	27.8262	31.3386
Q969H8	UPF0556 protein C19orf10	C19orf10	238020000	0	27.8265	#NUM!
F5H6G1;P06400	Retinoblastoma-associated protein	RB1	238340000	621610000	27.8284	29.2114
Q9BQE3;F5H5D3;E9PGK3;F8VS66	Tubulin alpha-1C chain	TUBA1C	239010000	369680000	27.8325	28.4617
Q9NR09;REV__Q96C03;REV__Q9NR09	Baculoviral IAP repeat-containing protein 6	BIRC6	243760000	993460000	27.8609	29.8879
Q9NRN7;E9PLW6;E9PNF3;B4DDW7	L-aminoadipate-semialdehyde dehydrogenase-phosphopantetheinyl transferase	AASDHPPT	244560000	1277100000	27.8656	30.2502
Q5TEC6	Histone H3	HIST2H3PS2	248180000	1045500000	27.8868	29.9615
Q9UN37	Vacuolar protein sorting-associated protein 4A	VPS4A	252330000	540210000	27.9107	29.0089
Q7Z7H5-3;Q7Z7H5;C9JUN6;Q7Z7H5-2;F8W7F7	Transmembrane emp24 domain-containing protein 4	TMED4	253070000	148350000	27.915	27.1444
F5H2U2;Q13523;H0YDJ3;H0YEC8	Serine/threonine-protein kinase PRP4 homolog	PRPF4B	255610000	1299600000	27.9294	30.2754
Q9BWJ5	Splicing factor 3B subunit 5	SF3B5	257230000	0	27.9385	#NUM!
Q92888;Q92888-3;Q92888-2;Q6NX52;H0Y2T4	Rho guanine nucleotide exchange factor 1	ARHGEF1	257670000	842910000	27.9409	29.6508
Q06203;D6RCC8;D6RE15	Amidophosphoribosyltransferase	PPAT	258290000	241310000	27.9444	27.8463
Q9BQ95;Q9BQ95-2;E9PAN9	Evolutionarily conserved signaling intermediate in Toll pathway, mitochondrial	ECSIT	259290000	0	27.95	#NUM!
Q969X5-2;Q969X5;F2Z3Q5;F2Z2U2;H0YBZ3;F2Z3A2;Q969X5-3	Endoplasmic reticulum-Golgi intermediate compartment protein 1	ERGIC1	259350000	597280000	27.9503	29.1538
O94906-2;O94906	Pre-mRNA-processing factor 6	PRPF6	262910000	3492300000	27.97	31.7015
Q6L8Q7;Q6L8Q7-2;F6T1Q0	2,5-phosphodiesterase 12	PDE12	263260000	875850000	27.9719	29.7061
Q96CU9-3;Q96CU9;B4DXM1;Q96CU9-2;E9PP78	FAD-dependent oxidoreductase domain-containing protein 1	FOXRED1	265630000	0	27.9848	#NUM!
P07108;P07108-3;P07108-2;B8ZWD7;B8ZWD6	Acyl-CoA-binding protein	DBI	266050000	2347100000	27.9871	31.1282
P09417;B3KW71;B7Z415;D6RGG7;H0Y8F7;D6RHJ7	Dihydropteridine reductase	QDPR	269560000	839390000	28.006	29.6448
Q9BTV4	Transmembrane protein 43	TMEM43	270760000	1274300000	28.0124	30.2471
P23193;P23193-2;E5RIS7;B7Z4S1;E5RJ93;Q15560;E5RK46;E5RFI1;Q5JRI7	Transcription elongation factor A protein 1	TCEA1	271170000	1259900000	28.0146	30.2307
Q7Z2K6;E7ER77;Q6ZMD3;B3KSB1	Endoplasmic reticulum metallopeptidase 1	ERMP1	271520000	0	28.0165	#NUM!
Q9UHD1;Q9UHD1-2;E9PPQ5;E9PIZ4;E9PSD5;E9PHZ2;E9PL00;E9PIF7	Cysteine and histidine-rich domain-containing protein 1	CHORDC1	271980000	1271100000	28.0189	30.2434
Q9Y263;E5RIM3;H0YBW4;H0YC16;H0YAU9	Phospholipase A-2-activating protein	PLAA	274910000	356260000	28.0344	28.4084
B1AMS2;F5H1J5;E7ETH8;Q14141-2;Q14141-4;Q14141;B4E049;F8W8Q8;Q14141-3;D6RDU5;D6RGI3;D6RER5;Q9NVA2;Q9NVA2-2;H0Y961;D6RDP1;D6R9Y6	Septin-6	2016-09-06	275300000	2879800000	28.0364	31.4233
Q9Y5J1;B2RAX6;H0YAJ9;H0Y8V3;H0Y8Z2;H0Y8K8	U3 small nucleolar RNA-associated protein 18 homolog	UTP18	277450000	326130000	28.0477	28.2809
P19174;P19174-2	1-phosphatidylinositol 4,5-bisphosphate phosphodiesterase gamma-1	PLCG1	279760000	122180000	28.0596	26.8644
O14672;A8MY20;B4DU28;H0YK87;C9J9B4;H0YNC5	Disintegrin and metalloproteinase domain-containing protein 10	ADAM10	281340000	641740000	28.0677	29.2574
Q9BVK6	Transmembrane emp24 domain-containing protein 9	TMED9	281710000	922030000	28.0696	29.7802
Q49AR2;H0YGU1;Q49AR2-2;B4DR92;E5RHP8;E5RFG1;Q49AR2-3	UPF0489 protein C5orf22	C5orf22	283370000	315040000	28.0781	28.231
P61978-3;Q5T6W5;Q5T6W2	Heterogeneous nuclear ribonucleoprotein K	HNRNPK	284030000	578110000	28.0815	29.1068
Q86UE4;E5RJU9;H0YBJ8;H0YBE0;H0YB56	Protein LYRIC	MTDH	284770000	738100000	28.0852	29.4592
F5GWD7;Q8WVC0;Q8WVC0-2	RNA polymerase-associated protein LEO1	LEO1	285070000	1205000000	28.0867	30.1664
E9PE68;Q9BZF1-2;Q9BZF1;F8VUA7;F8VQX7;F5H7T2;F8VZ43	Oxysterol-binding protein-related protein 8;Oxysterol-binding protein	OSBPL8	286030000	1148800000	28.0916	30.0975
P13612;E7EP60;E7ESG7;Q7Z4L6	Integrin alpha-4	ITGA4	286170000	789520000	28.0923	29.5564
O60216;B3KUT8;E5RJW1;E5RJK5;E5RFV8;E5RIN7;E5RI01;E5RFZ5;E5RG18;Q9H4I0;Q9H4I0-2	Double-strand-break repair protein rad21 homolog	RAD21	286470000	985750000	28.0938	29.8766
Q9GZN8;Q9GZN8-2;E9PAL2	UPF0687 protein C20orf27	C20orf27	287230000	381830000	28.0976	28.5084
P48147	Prolyl endopeptidase	PREP	289950000	4347500000	28.1112	32.0175
Q9UJX6-2;Q9UJX6	Anaphase-promoting complex subunit 2	ANAPC2	289960000	0	28.1113	#NUM!
Q86X83;F8WBW1	COMM domain-containing protein 2	COMMD2	290890000	0	28.1159	#NUM!
A8MTG3;H0Y3M2;O43670-2;O43670;E1P660;O43670-3	BUB3-interacting and GLEBS motif-containing protein ZNF207	ZNF207	290920000	960780000	28.116	29.8396
P62857	40S ribosomal protein S28	RPS28	291770000	0	28.1203	#NUM!
Q9BXR0;B4DFM7	Queuine tRNA-ribosyltransferase	QTRT1	292090000	1098500000	28.1218	30.0329
Q9NTZ6;A6PVI1;A6PVI0;Q5JX62	RNA-binding protein 12	RBM12	294270000	1459600000	28.1326	30.4429
O75521-2;O75521;C9J000;F1LLU7;F8WAW4;C9JB63;F8W6J1	Enoyl-CoA delta isomerase 2, mitochondrial	ECI2	294860000	1453500000	28.1355	30.4369
P15498;F5H5P4;H0YDG2;Q9UKW4-2;Q9UKW4;Q9UKW4-4	Proto-oncogene vav	VAV1	294950000	1517600000	28.1359	30.4991
F5H4G7;F5GYL8;O60684;Q5TFJ7;E9PC31;O15131;H0Y3K0	Importin subunit alpha-7;Importin subunit alpha-6	KPNA6;KPNA5	295740000	176820000	28.1398	27.3977
P51965;C9J2P0;C9J8K2;Q96LR5;C9IZU6;Q969T4;C9IYU3;C9J180	Ubiquitin-conjugating enzyme E2 E1;Ubiquitin-conjugating enzyme E2 E2;Ubiquitin-conjugating enzyme E2 E3	UBE2E1;UBE2E2;UBE2E3	296490000	444020000	28.1434	28.726
O60488-2;O60488;D6RF95;H0Y9A0;D6RD96;D6RFW9;D6RDA8	Long-chain-fatty-acid--CoA ligase 4	ACSL4	298050000	1397600000	28.151	30.3803
P62633-2;Q4JGY0;P62633;Q5U0E9;E9PDR7;B4DP17;P62633-3	Cellular nucleic acid-binding protein	CNBP	300250000	381790000	28.1616	28.5082
P49790;Q4LE47;F6QR24	Nuclear pore complex protein Nup153	NUP153	300810000	4707600000	28.1643	32.1323
Q9Y512;A8MZI2	Sorting and assembly machinery component 50 homolog	SAMM50	301110000	2192000000	28.1657	31.0296
Q9Y697-2;Q9Y697;F5GYK5;F2Z2E7;B4DNL7;A2A2M1;F8WER8;F8WCX6;F8WB23;B4DHP7;Q8WV90	Cysteine desulfurase, mitochondrial	NFS1	301250000	423090000	28.1664	28.6564
O75592-2;O75592;F8WA13	E3 ubiquitin-protein ligase MYCBP2	MYCBP2	301790000	656970000	28.169	29.2913
P62487;E9PIU7;E9PKH3;H0YEE4	DNA-directed RNA polymerase II subunit RPB7	POLR2G	301850000	557340000	28.1693	29.054
Q9UHV9	Prefoldin subunit 2	PFDN2	301880000	844520000	28.1694	29.6536
Q9HC38-2;Q9HC38;B7Z403;E7EMY5;Q9HC38-3	Glyoxalase domain-containing protein 4	GLOD4	302310000	1475500000	28.1715	30.4586
Q96I99;F5H4S7;E9PDQ8;Q96I99-2;H0Y852	Succinyl-CoA ligase [GDP-forming] subunit beta, mitochondrial	SUCLG2	302820000	547400000	28.1739	29.028
Q7L5D6;Q7L5D6-2;C9JPA8;C9JHN8;C9JY46	Golgi to ER traffic protein 4 homolog	GET4	303590000	373640000	28.1775	28.4771
P49189;B4DXY7	4-trimethylaminobutyraldehyde dehydrogenase	ALDH9A1	304020000	1515600000	28.1796	30.4972
P56202;E9PI30;H0YDT2	Cathepsin W	CTSW	304340000	291100000	28.1811	28.1169
G3V576;B2R603;G3V2Q1;P07910;G3V555;G3V575;P07910-3;B4DSU6;G3V4M8;G3V5V7;G8JL89;O60812;G3V2H6;Q569J8;E5RG71;B3KT61;Q86SE5;G3V129	Heterogeneous nuclear ribonucleoproteins C1/C2	HNRNPC	306040000	0	28.1891	#NUM!
Q92882	Osteoclast-stimulating factor 1	OSTF1	307770000	0	28.1973	#NUM!
Q9NUQ9;E5RI16;Q9NW21;F8W7X2;E5RJL8;E5RJE1;E5RIR8;E5RK61;E5RFS4;E5RHU5;E5RGI7;E5RK81;E5RH75	Protein FAM49B	FAM49B	310980000	1445000000	28.2122	30.4284
C9JGW8;Q8NBY1;E7ERH7;B4E0Y9;Q9P289;Q9P289-2;Q9P289-3;C9JJV0	Serine/threonine-protein kinase MST4	RBM4B;MST4	311020000	440770000	28.2124	28.7155
Q5T6K7;E9PI99;Q5T6K5;E9PF96;Q5T6K9;F8VWM3;Q13952-2;B4DUS6;Q13952-3;Q13952;E9PIG7;E9PL11;B4DW63;E9PJA8;E9PQR2;C9J777;F8W7L5	Nuclear transcription factor Y subunit gamma	NFYC	311060000	0	28.2126	#NUM!
F8W7U8;B3KTC7;P49959;P49959-2;F5GXT0;F5H742;F5H256	Double-strand break repair protein MRE11A	MRE11A	311860000	1993400000	28.2163	30.8926
F5H0F5;Q8WU90;B4DMW2;F8WB26;F8WF67	Zinc finger CCCH domain-containing protein 15	ZC3H15	312300000	970830000	28.2184	29.8546
Q9Y5B6;Q9Y5B6-2;Q9Y5B6-4;Q9Y5B6-3	PAX3- and PAX7-binding protein 1	PAXBP1	313860000	235440000	28.2255	27.8108
Q9Y4W2-2;Q9Y4W2;Q9Y4W2-3;Q9Y4W2-4	Ribosomal biogenesis protein LAS1L	LAS1L	316580000	927250000	28.238	29.7884
E7EX90;E9PFS5;E7EUR0;A8MWX9;E9PGE1;A8MY36;Q14203;G5E9H4;Q14203-2;Q6AWB1;C9JZA4;C9JTE5;C9JJN7;C9JJD0;C9JKG6;E9PCY0;C9J1B7;C9JJW7;C9JUI8	Dynactin subunit 1	DCTN1	316850000	1128700000	28.2392	30.072
A8MUE4;P36543;A8MUN4;C9J8H1;Q96A05	V-type proton ATPase subunit E 1	ATP6V1E1	317770000	1201400000	28.2434	30.1621
P61201;P61201-2;B4DIH5;H0YKU5;H0YM03;H0YMC2	COP9 signalosome complex subunit 2	COPS2	317790000	2631400000	28.2435	31.2932
Q15005;E9PL01;E9PI68;E9PRB9;H0YE04	Signal peptidase complex subunit 2	SPCS2	317930000	163000000	28.2441	27.2803
P52306;G5E9P9;E9PH06;P52306-2;Q499L7;H0Y8M2;D6RHH8;H0Y9J0;D6RF90;D6REZ0;D6RHZ7;D6RB97	Rap1 GTPase-GDP dissociation stimulator 1	RAP1GDS1	317980000	454720000	28.2444	28.7604
C9JJ19;P82930	28S ribosomal protein S34, mitochondrial	MRPS34	319740000	560390000	28.2523	29.0619
Q9BVC6;E7ETZ3	Transmembrane protein 109	TMEM109	320340000	0	28.255	#NUM!
O60518	Ran-binding protein 6	RANBP6	320730000	482220000	28.2568	28.8451
Q14966;Q14966-3;Q14966-4;C9JBI6;F5H330;Q14966-2;Q14966-5;E7EUZ3;F5H6M8;C9JWN0	Zinc finger protein 638	ZNF638	321110000	0	28.2585	#NUM!
Q92600;B7Z1E5;B5MDQ4;F8WBZ6	Cell differentiation protein RCD1 homolog	RQCD1	321440000	1075500000	28.26	30.0024
O75396	Vesicle-trafficking protein SEC22b	SEC22B	323600000	831230000	28.2696	29.6307
Q14694;Q14694-3;Q14694-2;Q68D90	Ubiquitin carboxyl-terminal hydrolase 10	USP10	324550000	3255900000	28.2739	31.6004
O94804;H0YB71	Serine/threonine-protein kinase 10	STK10	324940000	2769000000	28.2756	31.3667
O75306;B7Z9L2;F5H5P7	NADH dehydrogenase [ubiquinone] iron-sulfur protein 2, mitochondrial	NDUFS2	326970000	1024600000	28.2846	29.9324
Q92556;B4DJV6;Q92556-3;Q92556-2;C9JIW2;C9IZR8;C9J5X3;C9JB20	Engulfment and cell motility protein 1	ELMO1	327550000	1467500000	28.2871	30.4507
O43813;E9PHS0;F8WDS9	LanC-like protein 1	LANCL1	329100000	1059600000	28.294	29.9809
Q9UJX3-2;Q9UJX3;F8VZ62;F8VYX8;F8VVT8;F8VQY8;F8VVU6;H0YIW2;H0YIX7	Anaphase-promoting complex subunit 7	ANAPC7	331950000	675340000	28.3064	29.331
Q9NNW5;E9PDU5;E9PBK6;Q9NW86;C9JFP6;C9K020	WD repeat-containing protein 6	WDR6	332670000	2192800000	28.3095	31.0301
P36551;H0YA22;D6RER6	Oxygen-dependent coproporphyrinogen-III oxidase, mitochondrial	CPOX	333620000	1436600000	28.3136	30.42
Q9Y5S9-2;Q9Y5S9	RNA-binding protein 8A	RBM8A	333860000	171460000	28.3147	27.3533
P67809;E7ETA0;H0Y449;C9J5V9	Nuclease-sensitive element-binding protein 1	YBX1	334970000	426990000	28.3195	28.6696
Q86X10-3;A2A2E9;Q86X10;A2A2F0;Q86X10-2;Q86X10-4;B4E2E8	Ral GTPase-activating protein subunit beta	RALGAPB	335430000	507990000	28.3214	28.9202
Q99805;E9PHW5	Transmembrane 9 superfamily member 2	TM9SF2	337750000	692620000	28.3314	29.3675
P61081	NEDD8-conjugating enzyme Ubc12	UBE2M	338960000	1859500000	28.3365	30.7923
E7EMF9;Q8NBJ7;C9JL30;C9J660;E7EMQ6;A8MXB9;F8WA42;Q8NBJ7-2;Q8NBJ7-3;E9PBT8;E9PG02;Q8NBJ7-5;F8WEX5;F8WEV7;F8WES7;Q8NBJ7-4	Sulfatase-modifying factor 2	SUMF2	339400000	0	28.3384	#NUM!
Q9Y5U9	Immediate early response 3-interacting protein 1	IER3IP1	340340000	0	28.3424	#NUM!
Q99720;Q99720-2;Q5T1J1;E7ENK7;Q99720-4;Q99720-5;Q99720-3	Sigma non-opioid intracellular receptor 1	SIGMAR1	341580000	0	28.3476	#NUM!
Q96GW9;B4DVV7	Methionine--tRNA ligase, mitochondrial	MARS2	343750000	1652200000	28.3568	30.6217
P53004;C9J1E1	Biliverdin reductase A	BLVRA	344320000	325230000	28.3592	28.2769
O96000;Q96II6	NADH dehydrogenase [ubiquinone] 1 beta subcomplex subunit 10	NDUFB10	344620000	2422300000	28.3604	31.1737
C9JVN9;Q9H9P8-2;Q9H9P8;G3V272;G3V5S1	L-2-hydroxyglutarate dehydrogenase, mitochondrial	L2HGDH	345370000	0	28.3636	#NUM!
O75439;G3V0E4;B3KQ85;E7ERZ4;F8WAZ6;F8WEA6;F8WBE1	Mitochondrial-processing peptidase subunit beta	PMPCB	347190000	186680000	28.3712	27.476
Q9H4M9;F5H5B6;B4DZH9;C9JC03;C9J2Z4;C9JDQ8;C9JIJ3;C9IZH1;F5GXL2;F5H559;Q9NZN4	EH domain-containing protein 1	EHD1	348500000	1021000000	28.3766	29.9273
P51970;F5H7V7	NADH dehydrogenase [ubiquinone] 1 alpha subcomplex subunit 8	NDUFA8	350910000	1310900000	28.3865	30.2879
Q9UKN8;F2Z356	General transcription factor 3C polypeptide 4	GTF3C4	352600000	723850000	28.3935	29.4311
O75312	Zinc finger protein ZPR1	ZPR1	353270000	213830000	28.3962	27.6719
O95292;A6NLV9;E5RK64;O95292-2	Vesicle-associated membrane protein-associated protein B/C	VAPB	354120000	332490000	28.3997	28.3087
B4DVT3;B4DVD5;Q96SY0	von Willebrand factor A domain-containing protein 9	VWA9	354880000	1102300000	28.4028	30.0379
Q9H7B2;Q5VXN0;Q5VXM9	Ribosome production factor 2 homolog	RPF2	355380000	4007800000	28.4048	31.9002
Q8N3C0;E7EW23	Activating signal cointegrator 1 complex subunit 3	ASCC3	355600000	788250000	28.4057	29.5541
O95347;O95347-2;F5GZR0;Q5T821	Structural maintece of chromosomes protein 2	SMC2	361330000	392010000	28.4287	28.5463
G3XA81;Q9BTX1-2;Q9BTX1;B4DZG6;A6NEN1;Q9BTX1-3;Q9BTX1-4	Nucleoporin NDC1	NDC1	361670000	0	28.4301	#NUM!
E7EVA0;P27816-6;P27816;P27816-2;E9PGM5;P27816-4;B9ZVR1;P27816-5;B5MEG9;C9JFC3;H0Y2V1;F8W9U4;B4DSQ1;Q86V26	Microtubule-associated protein;Microtubule-associated protein 4	MAP4	361790000	3396100000	28.4306	31.6612
P11717	Cation-independent mannose-6-phosphate receptor	IGF2R	362100000	413620000	28.4318	28.6237
F5H3C9;Q13094;E7ESF6;E5RKA2	Lymphocyte cytosolic protein 2	LCP2	362190000	757710000	28.4322	29.4971
Q9UG63;C9JHK9;C9JZV3	ATP-binding cassette sub-family F member 2	ABCF2	362280000	2642000000	28.4325	31.299
P19387	DNA-directed RNA polymerase II subunit RPB3	POLR2C	362550000	543450000	28.4336	29.0176
C9JHZ3;Q14684;Q14684-2	Ribosomal RNA processing protein 1 homolog B	RRP1B	365140000	1674700000	28.4439	30.6413
P54709;C9JA36;B7Z1N7;C9JXZ1;F8WBY4	Sodium/potassium-transporting ATPase subunit beta-3	ATP1B3	366660000	4628500000	28.4499	32.1079
Q9Y5Q9;Q9Y5Q9-2;F8WC64	General transcription factor 3C polypeptide 3	GTF3C3	368340000	1071400000	28.4565	29.9969
Q14847;C9JVR8;Q14847-2;C9J9W2;B4DIC4;B4DGQ0;Q70I54	LIM and SH3 domain protein 1	LASP1	368610000	723600000	28.4575	29.4306
P67936;P67936-2;H0YL80;H0YKX5;H0YKP3;C9IZA2;H0YNC7;F5H7S3;H0YK48;H0YL52;B7Z596;Q6ZN40;P09493-2;P09493-5;Q9Y427;P09493-6;P09493-4;P09493-3;P09493;D9YZV8;D9YZV3;D9YZV2	Tropomyosin alpha-4 chain	TPM4	368660000	0	28.4577	#NUM!
F5H669;Q8N684-2;Q8N684;Q8N684-3;F5H6M0;F5H047;F5GWE6;C9J286;C9J323;C9JM38;F5H5B7;F5H1W4;F5H2K8;F5H6P5;F5H6A8;F5GXA3	Cleavage and polyadenylation specificity factor subunit 7	CPSF7	369340000	870220000	28.4604	29.6968
B4DQI6;B4DUA9;Q13595;Q13595-2	Transformer-2 protein homolog alpha	TRA2A	371370000	1173900000	28.4683	30.1287
P62310	U6 snRNA-associated Sm-like protein LSm3	LSM3	372020000	1419900000	28.4708	30.4031
Q7L8L6	FAST kinase domain-containing protein 5	FASTKD5	375960000	379290000	28.486	28.4987
Q86YV9	Hermansky-Pudlak syndrome 6 protein	HPS6	376450000	658270000	28.4879	29.2941
P42126;P42126-2	Enoyl-CoA delta isomerase 1, mitochondrial	ECI1	376900000	387700000	28.4896	28.5304
P04080	Cystatin-B	CSTB	380030000	822120000	28.5015	29.6148
Q9P2R7-2;Q9P2R7;F5GXC8;Q5T9Q5;F5H5G8;Q5T9Q8;F5H5Q7	Succinyl-CoA ligase [ADP-forming] subunit beta, mitochondrial	SUCLA2	380420000	1643200000	28.503	30.6139
Q01130;H0YG49;Q8NAK9;F5GYB8	Serine/arginine-rich splicing factor 2	SRSF2	380730000	627130000	28.5042	29.2242
Q14232;F5H0D0;B4DGX0;H0YGG4	Translation initiation factor eIF-2B subunit alpha	EIF2B1	383430000	2592100000	28.5144	31.2715
P25685;B4DX52;Q9UDY4	DnaJ homolog subfamily B member 1	DNAJB1	383600000	2302600000	28.515	31.1006
P63000;P63000-2	Ras-related C3 botulinum toxin substrate 1	RAC1	384300000	1753900000	28.5177	30.7079
B4DK80;Q13472-2;Q13472;B4DSJ0	DNA topoisomerase 3-alpha	TOP3A	385930000	219110000	28.5238	27.7071
Q9Y6M9;E9PH64;E7EWZ0;E9PF49	NADH dehydrogenase [ubiquinone] 1 beta subcomplex subunit 9	NDUFB9	385940000	599480000	28.5238	29.1591
P03886	NADH-ubiquinone oxidoreductase chain 1	MT-ND1	386130000	329120000	28.5245	28.294
Q14258	E3 ubiquitin/ISG15 ligase TRIM25	TRIM25	389260000	1204200000	28.5362	30.1654
Q9BY77;Q9BY77-2;F8WCX5;B4DMM2;B4DSH9;Q6R954;F8WEE2	Polymerase delta-interacting protein 3	POLDIP3	392370000	1796900000	28.5476	30.7429
B4DHP6;A6NM69;C9JC79;P22307;P22307-2;E1B6W5;H0YF61;E9PLD1;Q6NXF4;H0YCB0;H0YD06;F2Z3J1	Non-specific lipid-transfer protein	SCP2	393940000	971540000	28.5534	29.8557
Q9Y4Z0	U6 snRNA-associated Sm-like protein LSm4	LSM4	395160000	172600000	28.5579	27.3629
Q8TD19;B3KY50;G3V5V0;G3V459;G3V2Z5;REV__Q5SQT3;REV__Q9P0M6	Serine/threonine-protein kinase Nek9	NEK9	395170000	0	28.5579	#NUM!
P18887;F5H8D7;B4DEB2	DNA repair protein XRCC1	XRCC1;FOXH1	395880000	1279300000	28.5605	30.2527
Q7L0Y3;C9JVB6	Mitochondrial ribonuclease P protein 1	TRMT10C	395890000	2302700000	28.5605	31.1007
Q13573;G3V3A4;G3V4X8;E9PGQ7;G3V5R3	SNW domain-containing protein 1	SNW1	398820000	1308300000	28.5712	30.285
Q13428-3;E9PHK9;Q13428-8;Q13428;Q13428-4;E7ETY2;Q13428-2;Q13428-7;Q13428-6;Q13428-5	Treacle protein	TCOF1	399220000	760200000	28.5726	29.5018
Q9Y3B3;Q8NBU8;Q6JUT2	Transmembrane emp24 domain-containing protein 7;TIR domain-containing adapter molecule 2	TMED7;TICAM2	400700000	130440000	28.5779	26.9588
P07203;E9PAS1	Glutathione peroxidase 1	GPX1	402330000	1281600000	28.5838	30.2553
E7EWW0;Q7Z3J2;C9J7I2;Q7Z3J2-2;G5E9I3;F5H7K1	UPF0505 protein C16orf62	C16orf62	405710000	0	28.5959	#NUM!
E9PES1;P50897;B4DWU3;E9PMG2;Q5T0S4;P50897-2;E9PP28;E9PK48;E9PSE5	Palmitoyl-protein thioesterase 1	PPT1	407160000	1483600000	28.601	30.4665
O00233;F5H5V4;F5GX23;F8W7V8;O00233-2;F5H169;F5H182;F5H7X1;G3V1Q6	26S proteasome non-ATPase regulatory subunit 9	PSMD9	411460000	1801100000	28.6162	30.7462
E9PC28;P08575-2;P08575;F5GXY8;E9PMF8;F5GXZ3;F5H547;E9PKH0	Receptor-type tyrosine-protein phosphatase C	PTPRC	411950000	1266200000	28.6179	30.2379
Q9UJX4;F5H0F9;E9PFB2;H0YFB5;F5H0N1;F5GY68;B4DFK4;Q9UJX4-2;F5H3S5;F5GZ05	Anaphase-promoting complex subunit 5	ANAPC5	412780000	1600800000	28.6208	30.5761
Q9BUL8;C9J5C3;C9J363;C9J6F3;C9JSA3;C9JND6;C9J932;F8WDF3	Programmed cell death protein 10	PDCD10	412990000	175860000	28.6215	27.3899
Q96K24;Q9H3L2;Q1HDL3;B4DT74;O75352	Mannose-P-dolichol utilization defect 1 protein	HBEBP2BPA;MPDU1	413420000	0	28.623	#NUM!
Q9BV20;Q9BV20-2	Methylthioribose-1-phosphate isomerase	MRI1	416820000	901840000	28.6348	29.7483
Q99567;B4DP20	Nuclear pore complex protein Nup88	NUP88	417010000	730240000	28.6355	29.4438
Q13526;E7EQR5;Q49AR7	Peptidyl-prolyl cis-trans isomerase NIMA-interacting 1	PIN1	419000000	1681000000	28.6424	30.6467
E7ENU4;P55265;P55265-4;P55265-5;H0YCK3;P55265-3;P55265-2	Double-stranded RNA-specific adenosine deaminase	ADAR	420710000	3361600000	28.6483	31.6465
Q99536;B3KUF8;B0AZP7;E9PF80	Synaptic vesicle membrane protein VAT-1 homolog	VAT1	421350000	2169400000	28.6504	31.0146
E5RIW3;E5RJD8;O75347;B4DT30;E5RIX8	Tubulin-specific chaperone A	TBCA	421680000	217700000	28.6516	27.6978
Q96M27;G3XAL7;C9J436;Q96M27-3;Q96M27-2;Q96M27-5;C9JTJ7;Q96M27-4	Protein PRRC1	PRRC1	422920000	0	28.6558	#NUM!
P28074;E9PAV2;H0YJM8;G8JLC2;G3V3K3	Proteasome subunit beta type-5	PSMB5	423750000	301200000	28.6586	28.1661
Q9HCN8	Stromal cell-derived factor 2-like protein 1	SDF2L1	423950000	977890000	28.6593	29.8651
F5GX82;O94915;F2Z2S2;D6RJI4;H0Y9X0;O94915-2	Protein furry homolog-like	FRYL	424630000	631520000	28.6616	29.2343
P11279;B4DWL3	Lysosome-associated membrane glycoprotein 1	LAMP1	424770000	2958100000	28.6621	31.462
F8W7Q4;Q96A26;E9PH05	Protein FAM162A	FAM162A	425750000	0	28.6654	#NUM!
Q9Y547	Intraflagellar transport protein 25 homolog	HSPB11	426150000	0	28.6668	#NUM!
P25325;B1AH49;E7ENL2;E7ERL2	3-mercaptopyruvate sulfurtransferase;Sulfurtransferase	MPST	426170000	725340000	28.6669	29.4341
E7EPM6;P33121;P33121-2;B7Z452;B7Z3Z9;D6RER0;H0Y9U7;H0Y9Z9;D6RG07;Q9UKU0-7	Long-chain-fatty-acid--CoA ligase 1	ACSL1	426260000	1584100000	28.6672	30.561
H0YNG3;H0YK72;P67812;H0YK83;H0YNX5;H0YNA5;H0YKT4	Signal peptidase complex catalytic subunit SEC11A	SEC11A	426480000	1146000000	28.6679	30.094
Q9Y2K7;E9PIL6;Q9Y2K7-2;D4QA03;Q9Y2K7-3;E7EMR1	Lysine-specific demethylase 2A	KDM2A	428140000	421440000	28.6735	28.6508
Q5XKP0	Protein QIL1	QIL1	428300000	105150000	28.674	26.6479
Q96GM8;B4DEM6	Target of EGR1 protein 1	TOE1	429310000	632140000	28.6774	29.2357
Q8TA92;Q9Y4W6;B7Z651;E9PHW9;F8WEF9;Q01484-5;Q01484-2;Q01484;Q01484-4	AFG3-like protein 2	AFG3L2	429900000	558170000	28.6794	29.0561
F8VRR3;B4DUX5;F8VQZ7;G3XA91;P50579;G3V1U3;F8VZX9;F8VY03	Methionine aminopeptidase 2	METAP2	430420000	1444600000	28.6812	30.428
E2QRD4;Q6ZRQ5;H0YAJ2	Protein MMS22-like	MMS22L	431240000	0	28.6839	#NUM!
Q99439;E7ENR3;A6NFI4;F8WA86;Q15417	Calponin-2	CNN2	432290000	2172900000	28.6874	31.017
F5H721;Q9Y2W2;F5H5G4;F5GXS9	WW domain-binding protein 11	WBP11	434910000	3199700000	28.6961	31.5753
Q15428	Splicing factor 3A subunit 2	SF3A2	435380000	1715500000	28.6977	30.676
Q5VWC4;P55036;A6PVX3;P55036-2;E9PEX5;H0Y3Y9;H0Y561;E9PGL8	26S proteasome non-ATPase regulatory subunit 4	PSMD4	435700000	2427900000	28.6988	31.1771
O43396;G3V1K0	Thioredoxin-like protein 1	TXNL1	436950000	1704800000	28.7029	30.667
A0AVT1;A0AVT1-2;H0Y8S8;A0AVT1-4;A0AVT1-3	Ubiquitin-like modifier-activating enzyme 6	UBA6	439160000	1116700000	28.7102	30.0566
Q9H9Q2;Q9H9Q2-3;Q9H9Q2-2	COP9 signalosome complex subunit 7b	COPS7B	439960000	1425600000	28.7128	30.4089
Q02978;F5GY65	Mitochondrial 2-oxoglutarate/malate carrier protein	SLC25A11	440950000	1455100000	28.716	30.4385
B4DQI8;P61224;B4DW94;A6NIZ1;E7ESV4;F5H7Y6;B4DW74;B7ZB78;F5GX62;F5H823;F5H6R7;F5GZG1;F5H004;F5GYB5;F5H147	Ras-related protein Rap-1b;Ras-related protein Rap-1b-like protein	RAP1B	441760000	680870000	28.7187	29.3428
Q01650;H0YJ95;G3V4Z6;B4DVT0;Q9UM01;Q92536	Large neutral amino acids transporter small subunit 1	SLC7A5	444430000	917630000	28.7274	29.7733
Q96IX5	Up-regulated during skeletal muscle growth protein 5	USMG5	444640000	300290000	28.7281	28.1618
Q99797	Mitochondrial intermediate peptidase	MIPEP	445280000	564970000	28.7301	29.0736
C9JV95;Q9NY93;G3V0G3;F8WDT8;F8WEI3	Probable ATP-dependent RNA helicase DDX56	DDX56	447870000	2301400000	28.7385	31.0999
Q9NRZ9-2;Q9NRZ9;Q9NRZ9-4;Q9NRZ9-3;Q9NRZ9-5;Q9NRZ9-6;Q9NRZ9-7;Q9NRZ9-8;Q9NW36;B1ALG6;Q76H82;Q9NRZ9-9	Lymphoid-specific helicase	HELLS	449330000	1600300000	28.7432	30.5757
Q96RS6;Q96RS6-2;Q96RS6-3;E5RGX7	NudC domain-containing protein 1	NUDCD1	450880000	329050000	28.7482	28.2937
A2A2V2;E9PHU9;P42696;P42696-2;Q5TCT4	RNA-binding protein 34	RBM34	450910000	356740000	28.7483	28.4103
Q9UJA5;Q9UJA5-2;Q9UJA5-3;B4DUV6	tRNA (adenine(58)-N(1))-methyltransferase non-catalytic subunit TRM6	TRMT6	450940000	1011800000	28.7484	29.9143
E9PGE6;Q9UI12-2;Q9UI12;G3V126;H0YB41;E5RG49;E5RHH0;E5RG90;E5RK31;E5RJG1;E5RFZ9	V-type proton ATPase subunit H	ATP6V1H	451150000	883250000	28.749	29.7182
A9Z1X7;E9PCT1;Q8IYB3-2;Q8IYB3;B4DED5	Serine/arginine repetitive matrix protein 1	SRRM1	453070000	550590000	28.7552	29.0364
Q9BQG0;Q9BQG0-2;E7EN09	Myb-binding protein 1A	MYBBP1A	456360000	1673600000	28.7656	30.6403
Q9Y3D9	28S ribosomal protein S23, mitochondrial	MRPS23	459690000	1210200000	28.7761	30.1726
Q9UBF2;F6X838;Q92521	Coatomer subunit gamma-2	COPG2	461120000	1085100000	28.7806	30.0152
Q03252	Lamin-B2	LMNB2	463250000	838790000	28.7872	29.6437
P05091;F8W0A9;E7EUE5;F8VXI5;F8VP50;H0Y4S2;H0Y2X5;E7ENA1;H0YMG7;F5H3R1;H0YM00;O94788-2;F5H2Y9;P47895;O94788	Aldehyde dehydrogenase, mitochondrial	ALDH2	470060000	643570000	28.8083	29.2615
Q13601-2;Q13601	KRR1 small subunit processome component homolog	KRR1	471480000	466790000	28.8126	28.7982
O14579;F5H1E1;A6NE29;A6NKA3	Coatomer subunit epsilon	COPE	471600000	835030000	28.813	29.6373
Q14CX7;Q14CX7-2;F8W1S0;H0YHR9;F8VSB9	N-alpha-acetyltransferase 25, NatB auxiliary subunit	NAA25	472610000	1854400000	28.8161	30.7883
P45983-3;P45983-4;P45983-2;P45983;H0Y9H3;P53779-2;P53779-3;P53779;A6NF29;Q499Y8;A8MWW6;E9PBU5;P53779-4;Q308M2;P45984-3;P45984-2;P45984-4;P45984;D7R525;P45984-5;C9JWQ4;C9J762;D6RBH2;D6R9C1;E5RJ57;D6RAJ0;D6RCB1;D6RAU3;A8MPV1	Mitogen-activated protein kinase 8;Mitogen-activated protein kinase 10;Mitogen-activated protein kinase 9	MAPK8;MAPK10;MAPK9	473750000	0	28.8196	#NUM!
Q9HBD4;F5H0X5;B1A8Z4;B1A8Z7;B1A8Z6;B1A8Z5;P51532;H0YGM3	Transcription activator BRG1	SMARCA4	474300000	696360000	28.8212	29.3753
H0YCY6;Q3LXA3;E9PJG8	Bifunctional ATP-dependent dihydroxyacetone kinase/FAD-AMP lyase (cyclizing);ATP-dependent dihydroxyacetone kinase;FAD-AMP lyase (cyclizing)	DAK	474730000	707450000	28.8225	29.3981
E7ER94;Q9BZL6;C9JDA4;E7ET86;A8MU99;Q00532;Q8IVW4-2;Q92772;Q8IVW4;Q00532-2;O76039;Q9NRP7-2;Q9NRP7	Serine/threonine-protein kinase D2	PRKD2	474750000	715800000	28.8226	29.415
Q13596;Q13596-2;A6NKH4;H0Y2M5;H0YK42;H0YK43;H0YKD5;H0YKL5;H0YK58	Sorting nexin-1	SNX1	477130000	1363100000	28.8298	30.3442
Q9UNQ2;D6RCL3	Probable dimethyladenosine transferase	DIMT1	477200000	2113500000	28.83	30.977
P53597	Succinyl-CoA ligase [ADP/GDP-forming] subunit alpha, mitochondrial	SUCLG1	478420000	454270000	28.8337	28.759
Q14554;Q9BV43;C9JY10	Protein disulfide-isomerase A5	PDIA5	478780000	483230000	28.8348	28.8481
Q9Y5Y5;Q9Y5Y5-2;E9PMM3;E9PP98;E9PQW0;E9PMS3;E9PLS4	Peroxisomal membrane protein PEX16	PEX16	479090000	0	28.8357	#NUM!
Q9BXW7-2;Q9BXW7;A8MYZ9	Cat eye syndrome critical region protein 5	CECR5	482130000	1817500000	28.8448	30.7593
Q9Y224;G3V4C6;G3V4E7	UPF0568 protein C14orf166	C14orf166	483410000	733830000	28.8487	29.4509
P28070	Proteasome subunit beta type-4	PSMB4	484100000	2061900000	28.8507	30.9413
P31937	3-hydroxyisobutyrate dehydrogenase, mitochondrial	HIBADH	485100000	1748600000	28.8537	30.7036
P60468	Protein transport protein Sec61 subunit beta	SEC61B	485210000	0	28.854	#NUM!
Q9UKX7-2;Q9UKX7;B4E2D3;E9PH35;B0QY21	Nuclear pore complex protein Nup50	NUP50	485460000	1321500000	28.8548	30.2995
P35251-2;P35251;H0Y8U4;D6RAD2;E0CX09	Replication factor C subunit 1	RFC1	485470000	1650200000	28.8548	30.62
Q9UI09;F8VRD8;F8VXI1;F8VQS7;H0YID5	NADH dehydrogenase [ubiquinone] 1 alpha subcomplex subunit 12	NDUFA12	489870000	1107800000	28.8678	30.0451
G8JLB3;Q9Y606-2;Q9Y606;F5H1S9;F5GY32;F5GXL3;F5H168;F8W9U5;F5H1B2	tRNA pseudouridine synthase;tRNA pseudouridine synthase A, mitochondrial	PUS1	490220000	4258400000	28.8689	31.9877
Q15785;Q6ZPD0	Mitochondrial import receptor subunit TOM34	TOMM34	493060000	1437400000	28.8772	30.4208
Q14240;Q14240-2;E7EQG2;Q9NZE6	Eukaryotic initiation factor 4A-II	EIF4A2	493550000	591140000	28.8786	29.1389
Q9UBL3-3;Q9UBL3;F5H8F7;Q9UBL3-2;H0YBF6;F5H4L4;H0YAQ0;E5RFH5	Set1/Ash2 histone methyltransferase complex subunit ASH2	ASH2L	495760000	473380000	28.8851	28.8184
O43172-2;O43172	U4/U6 small nuclear ribonucleoprotein Prp4	PRPF4	499580000	3125100000	28.8961	31.5413
Q08752;H0Y8J0	Peptidyl-prolyl cis-trans isomerase D	PPID	499970000	1984700000	28.8973	30.8863
O94966-4;O94966-3;O94966;E7EN22;E7ETS0;E9PEG8;E7ESU0;E7EST9;B5MEG5;O94966-2;E7EM45;C9J8M4	Ubiquitin carboxyl-terminal hydrolase 19;Ubiquitin carboxyl-terminal hydrolase	USP19	500100000	312580000	28.8976	28.2197
Q9Y333	U6 snRNA-associated Sm-like protein LSm2	LSM2	502130000	1570900000	28.9035	30.5489
F8WCH5;Q96D96;Q96D96-2;Q96D96-3;F8VPF7;F8W0B3;F8VS40	Voltage-gated hydrogen channel 1	HVCN1	502170000	233210000	28.9036	27.7971
O14745;E7EV06	Na(+)/H(+) exchange regulatory cofactor NHE-RF1	SLC9A3R1	503550000	1091800000	28.9076	30.0241
P08559;P08559-3;P08559-2;A5YVE9;Q5JPU0;Q5JPT9;Q5JPU1;Q5JPU3;P29803;Q5JPU2	Pyruvate dehydrogenase E1 component subunit alpha, somatic form, mitochondrial	PDHA1	505440000	1713200000	28.913	30.674
O75436;F5H4L7;A8MZ56;G3V1N8	Vacuolar protein sorting-associated protein 26A	VPS26A	508540000	1411800000	28.9218	30.3949
P41223;C9JNV2;C9JCD9;F8WCN7	Protein BUD31 homolog	BUD31	509970000	2339800000	28.9258	31.1237
Q9P016;Q9P016-2;E9PPQ6	Thymocyte nuclear protein 1	THYN1	510210000	490940000	28.9265	28.871
Q15007;Q15007-2	Pre-mRNA-splicing regulator WTAP	WTAP	510650000	389360000	28.9278	28.5365
P49257	Protein ERGIC-53	LMAN1	510730000	911140000	28.928	29.7631
Q08AM6;B3KSM8;REV__Q5W0A0-2;REV__Q5W0A0	Protein VAC14 homolog	VAC14	511580000	1001400000	28.9304	29.8994
O15498;B4DR94	Synaptobrevin homolog YKT6	YKT6	514290000	1017800000	28.938	29.9228
Q8NBQ5;D6RCD0	Estradiol 17-beta-dehydrogenase 11	HSD17B11	516960000	3258100000	28.9455	31.6014
O60493;O60493-2;O60493-4;O60493-3	Sorting nexin-3	SNX3	517940000	2605500000	28.9482	31.2789
O00170;E9PMH2;E9PPD7	AH receptor-interacting protein	AIP	519740000	1714600000	28.9532	30.6752
G3V1M7;P49748-2;P49748;F5H2A9;F5GYP4	Very long-chain specific acyl-CoA dehydrogenase, mitochondrial	ACADVL	520840000	1972400000	28.9563	30.8773
P56385	ATP synthase subunit e, mitochondrial	ATP5I	521670000	1675200000	28.9586	30.6417
Q99614;H0YB37	Tetratricopeptide repeat protein 1	TTC1	522090000	250760000	28.9597	27.9017
Q5T123;Q9H299	SH3 domain-binding glutamic acid-rich-like protein 3	SH3BGRL3	523940000	523930000	28.9648	28.9648
P47914	60S ribosomal protein L29	RPL29	524100000	135720000	28.9653	27.0161
O15212;A2AB88	Prefoldin subunit 6	PFDN6	526250000	955830000	28.9712	29.8322
Q15070-2;Q15070;E7EVY0;C9JC63;Q15070-3	Mitochondrial inner membrane protein OXA1L	OXA1L	526630000	363320000	28.9722	28.4367
H0YEF3;Q8TDP1;E9PN81;Q8TDP1-2;E9PKP0;H0YE52;H0YCP5	Ribonuclease H2 subunit C	RNASEH2C	527270000	1314800000	28.974	30.2922
Q8TB61-3;Q8TB61-2;Q8TB61;B4DDM2;F5H7Y9	Adenosine 3-phospho 5-phosphosulfate transporter 1	SLC35B2	528070000	403390000	28.9762	28.5876
Q4TT38;Q13084;A2IDC6;A2IDC7;Q4TT37	39S ribosomal protein L28, mitochondrial	MRPL28	528270000	583990000	28.9767	29.1214
P62266;D6RD47;D6RDJ2;D6RIX0;D6R9I7	40S ribosomal protein S23	RPS23	528570000	411280000	28.9775	28.6155
Q9ULV4;A7MAP0;B4E3S0;H0YHL7;F8W1H8;F8VUX3;F8VSA4;F8VRE9;F8VTT6;F8VVB7;F8VV53;B3KRY9;F8W759;Q6QEF8-4;Q6QEF8-3;Q6QEF8-2;Q6QEF8-5;Q6QEF8	Coronin-1C;Coronin	CORO1C	531180000	2804200000	28.9846	31.3849
Q13505-3;Q13505;H0Y6Y5;Q13505-2	Metaxin-1	MTX1	531970000	1072000000	28.9868	29.9977
O15042-2;O15042;E7ET15;O15042-3;C9JB80;H0Y8D9;E7EW00	U2 snRNP-associated SURP motif-containing protein	U2SURP	533630000	2104600000	28.9913	30.9709
P19388	DNA-directed RNA polymerases I, II, and III subunit RPABC1	POLR2E	535500000	2682400000	28.9963	31.3209
Q15056-2;Q15056	Eukaryotic translation initiation factor 4H	EIF4H	536820000	4852100000	28.9999	32.176
F2Z2Q3;E9PHI3;Q8TAG9;E7EW84;F2Z3K0;Q9Y2D4-2	Exocyst complex component 6	EXOC6	536980000	863840000	29.0003	29.6862
O75165;F5GX04;H0Y8Q2	DnaJ homolog subfamily C member 13	DNAJC13	538560000	1445200000	29.0045	30.4286
P05107;A8MYE6;F5H0T6;E7EVZ9;E5RK25;E5RIG7	Integrin beta-2;Integrin beta	ITGB2	539820000	2387300000	29.0079	31.1527
Q9H270	Vacuolar protein sorting-associated protein 11 homolog	VPS11	540340000	436000000	29.0093	28.6998
Q13098-5;Q13098;Q13098-7;C9JFE4;Q13098-6;Q59F65	COP9 signalosome complex subunit 1	GPS1	542010000	2799000000	29.0137	31.3823
P04181;Q68CS0	Ornithine aminotransferase, mitochondrial;Ornithine aminotransferase, hepatic form;Ornithine aminotransferase, renal form	OAT	542810000	1484900000	29.0159	30.4677
P62306;F8W0W6	Small nuclear ribonucleoprotein F	SNRPF	544620000	1269400000	29.0207	30.2415
Q92520;C9JP35;C9JMN4;C9J2R0	Protein FAM3C	FAM3C	546770000	245410000	29.0264	27.8706
O43681;E7EVN0	ATPase ASNA1	ASNA1	547600000	913390000	29.0285	29.7667
Q9Y5X3;E9PBC7;Q5QPE5;Q5QPE4	Sorting nexin-5	SNX5	551430000	1096800000	29.0386	30.0307
O75792	Ribonuclease H2 subunit A	RNASEH2A	552920000	749420000	29.0425	29.4812
Q69YN4;Q69YN4-3;Q69YN4-2;Q69YN4-4;H0YBN5	Protein virilizer homolog	KIAA1429	553220000	1876700000	29.0433	30.8056
A2A2D0;P16949;P16949-2	Stathmin	STMN1	555540000	1252600000	29.0493	30.2223
P55145	Mesencephalic astrocyte-derived neurotrophic factor	MANF	556480000	511130000	29.0518	28.9291
P53007;B4DP62	Tricarboxylate transport protein, mitochondrial	SLC25A1	556850000	1565800000	29.0527	30.5443
Q8IXB1;F8W884;Q8IXB1-2;E7EP04;Q3B7W8;Q71S60	DnaJ homolog subfamily C member 10	DNAJC10	557380000	445820000	29.0541	28.7319
P84077;F5H3A6	ADP-ribosylation factor 1	ARF1	558560000	171350000	29.0571	27.3524
P49247;Q53R32	Ribose-5-phosphate isomerase	RPIA	559840000	707430000	29.0604	29.398
Q8N5K1;D6RCF4	CDGSH iron-sulfur domain-containing protein 2	CISD2	561070000	811190000	29.0636	29.5955
P49593;A8MX49;B7Z2C3;B5MCT7;C9J2F3;C9JL74	Protein phosphatase 1F	PPM1F	562620000	1364600000	29.0676	30.3458
P09669	Cytochrome c oxidase subunit 6C	COX6C	562700000	2425200000	29.0678	31.1755
Q9Y676;B4DFG6;Q5STN0	28S ribosomal protein S18b, mitochondrial	MRPS18B	564600000	737620000	29.0727	29.4583
P21912	Succinate dehydrogenase [ubiquinone] iron-sulfur subunit, mitochondrial	SDHB	567100000	2436500000	29.079	31.1822
P63218	Guanine nucleotide-binding protein G(I)/G(S)/G(O) subunit gamma-5	GNG5	567430000	728060000	29.0799	29.4395
Q5HYE4;B4DKY1;P49589-2;P49589;A8MVQ3;E9PRS8;E9PLP0;C9JLN0	Cysteine--tRNA ligase, cytoplasmic	CARS	568170000	755400000	29.0817	29.4927
O76096	Cystatin-F	CST7	569730000	128500000	29.0857	26.9372
Q5T760;Q8IWE6;Q05519;B4DWT1;B4DTC1;Q5T757	Serine/arginine-rich splicing factor 11	SRSF11	571110000	2013600000	29.0892	30.9071
C9JX01;Q9UM00-2;Q9UM00	Transmembrane and coiled-coil domain-containing protein 1	TMCO1	571400000	271580000	29.0899	28.0168
F2Z2Y6;O95777;C9JNV3;C9JIZ0	U6 snRNA-associated Sm-like protein LSm8	LSM8	574270000	1351600000	29.0972	30.332
P51570;A6NJD0	Galactokinase	GALK1	575290000	1358500000	29.0997	30.3394
Q8NBL1;F8WEW4;B4DVA9	Protein O-glucosyltransferase 1	POGLUT1	576180000	1396500000	29.1019	30.3792
E7EUX0;P35637-2;P35637;B4DR70;A6NMX6	RNA-binding protein FUS	FUS	577720000	856860000	29.1058	29.6745
O95139;Q5VYT2	NADH dehydrogenase [ubiquinone] 1 beta subcomplex subunit 6	NDUFB6	578480000	34360000	29.1077	25.0342
Q6P6C2-2;Q6P6C2;F5H6G2	RNA demethylase ALKBH5	ALKBH5	578640000	818990000	29.1081	29.6093
P19784	Casein kinase II subunit alpha	CSNK2A2	579520000	3022000000	29.1103	31.4929
Q8NCN5;A8MT40;E7EMA7;B3KSE1;B3KU99	Pyruvate dehydrogenase phosphatase regulatory subunit, mitochondrial	PDPR	579700000	1176900000	29.1107	30.1323
P84095;F8WET9;B1AH79;G3V4H1;G3V476;Q9H4E5-2;P17081;Q9H4E5	Rho-related GTP-binding protein RhoG	RHOG	582420000	1805500000	29.1175	30.7498
Q92608;E5RFJ0;E7ERW7;B3KXW9;Q92608-2;H0YB76	Dedicator of cytokinesis protein 2	DOCK2	584250000	3878100000	29.122	31.8527
P25788-2;P25788;G3V4X5;G3V3W4;G3V5N4	Proteasome subunit alpha type-3	PSMA3	587000000	909050000	29.1288	29.7598
P35219	Carbonic anhydrase-related protein	CA8	587240000	629320000	29.1294	29.2292
Q6UN15-3;G3XAD6;Q6UN15;Q6UN15-4;H0Y8P7	Pre-mRNA 3-end-processing factor FIP1	FIP1L1	588810000	735160000	29.1332	29.4535
Q9NZL9;Q9NZL9-2;Q9NZL9-4;Q9NZL9-3;B7Z1X8;E5RJR3;E5RFS9;Q9NZL9-5	Methionine adenosyltransferase 2 subunit beta	MAT2B	588810000	799600000	29.1332	29.5747
E5RHG8;Q15369;E5RGD9;E5RJ89	Transcription elongation factor B polypeptide 1	TCEB1	589030000	773110000	29.1338	29.5261
Q02241-2;Q02241;B4E1K0;H0YMJ4;H0YNS5;H0YME6;H0YKQ5;H0YNT8;H0YMH4;H0YNT9;H0YMI3	Kinesin-like protein KIF23	KIF23	594290000	537130000	29.1466	29.0007
P11172;B5LY68;P11172-2;E9PFD2;B5LY72;F2Z3P2;F2Z303;F8WDG4	Uridine 5-monophosphate synthase;Orotate phosphoribosyltransferase;Orotidine 5-phosphate decarboxylase	UMPS	594730000	4400500000	29.1477	32.035
P24666;G5E9R5;B5MCC7;F2Z2Q9;C9JNS5;P24666-3;P24666-2;D3YTI2	Low molecular weight phosphotyrosine protein phosphatase	ACP1	598090000	1349600000	29.1558	30.3299
Q92538	Golgi-specific brefeldin A-resistance guanine nucleotide exchange factor 1	GBF1	599470000	1178900000	29.1591	30.1348
Q9Y2Q3;Q9Y2Q3-3;Q9Y2Q3-2;E9PFN5;Q9Y2Q3-4;C9JNT3	Glutathione S-transferase kappa 1	GSTK1	599840000	1345800000	29.16	30.3258
G5E9M3;Q16629;A6NNE8;C9JAB2;Q16629-3;Q16629-2;F8WEA1	Serine/arginine-rich splicing factor 7	SRSF7	601490000	619490000	29.164	29.2065
Q9BRX2	Protein pelota homolog	PELO	603000000	0	29.1676	#NUM!
Q9NQT5;A8K0K6	Exosome complex component RRP40	EXOSC3	603510000	529480000	29.1688	28.98
O14617;O14617-5;O14617-4;G5E988;O14617-2;E7EMM2;O14617-3	AP-3 complex subunit delta-1	AP3D1	603520000	1363800000	29.1688	30.345
Q5TGZ0;Q5TGZ0-2	MICOS complex subunit MIC10	MINOS1	603720000	0	29.1693	#NUM!
B4DP27;Q15363;F5GX39;E7EQ72;F6QWA0	Transmembrane emp24 domain-containing protein 2	TMED2	604260000	516300000	29.1706	28.9436
P26447;F5H3J5	Protein S100-A4	S100A4	605960000	694390000	29.1746	29.3712
Q7KZ85;Q7KZ85-2;Q7KZ85-3	Transcription elongation factor SPT6	SUPT6H	606670000	2369500000	29.1763	31.1419
Q15052;F5H8B2;B7Z3C7;Q15052-2;C9JDI6;B1ANY6;E7ENL8;E7EU80	Rho guanine nucleotide exchange factor 6	ARHGEF6	609620000	3134000000	29.1833	31.5454
O00178;E9PBK9;B0QY59;F5H716;F5H257	GTP-binding protein 1	GTPBP1	612430000	713510000	29.19	29.4104
Q14728;D6RIZ4;D6RE79;D6RA47;D6R9N3;D6RHV1	Major facilitator superfamily domain-containing protein 10	MFSD10	613990000	0	29.1936	#NUM!
O75874;C9J4N6;C9JJE5;C9JLU6	Isocitrate dehydrogenase [NADP] cytoplasmic	IDH1	616300000	2591600000	29.1991	31.2712
E9PF19;Q9Y4P3;Q96E41;C9JVF0;F8WCR3;F8WDI9	Transducin beta-like protein 2	TBL2	618670000	1446700000	29.2046	30.4301
Q9Y2S7	Polymerase delta-interacting protein 2	POLDIP2	619640000	516580000	29.2069	28.9444
Q96Q11;Q96Q11-2;C9JRS7;F8W8C3;Q96Q11-3	CCA tRNA nucleotidyltransferase 1, mitochondrial	TRNT1	619700000	662370000	29.207	29.3031
O75976;F5GZH6;F5H0M8	Carboxypeptidase D	CPD	619960000	1342300000	29.2076	30.3221
Q7Z2W4;C9J6P4;Q7Z2W4-2;Q7Z2W4-3;F5H1W0;Q7Z2W4-4;Q7Z2W4-5	Zinc finger CCCH-type antiviral protein 1	ZC3HAV1	620220000	1621800000	29.2082	30.5949
P35658-4;P35658-3;P35658-2;P35658;P35658-5;Q5JUP9;F5H131;H0Y837;B7ZAV2;H0YF36;B4DZN4;E9PKD2	Nuclear pore complex protein Nup214	NUP214	622300000	1195600000	29.213	30.1551
E7ETB3;Q9ULA0;H0YGP0;E7EMB6;E7EWP4;F8WAN0;C9JBE1;B9ZVU2;E7EPX3;E5RJ35;C9J1E2;C9JRG3	Aspartyl aminopeptidase	DNPEP	623680000	1258300000	29.2162	30.2288
Q9H307;Q9H307-2;G3V5F0;G3V579	Pinin	PNN	627350000	4314400000	29.2247	32.0065
A8MZ71;P14406;D6R9C3;D6RIE3;D6RGV5	Cytochrome c oxidase subunit 7A2, mitochondrial	COX7A2	627450000	0	29.2249	#NUM!
P57678;E7EN12	Gem-associated protein 4	GEMIN4	628540000	1367800000	29.2274	30.3492
Q9BRG1	Vacuolar protein-sorting-associated protein 25	VPS25	628580000	555320000	29.2275	29.0487
F8VX04;B5MEC5;Q9H2H9	Sodium-coupled neutral amino acid transporter 1	SLC38A1	632370000	117840000	29.2362	26.8123
G3V1X9;P45973;F8VNY3	Chromobox protein homolog 5	CBX5	634200000	1740400000	29.2404	30.6968
O75964;E9PN17	ATP synthase subunit g, mitochondrial	ATP5L	635000000	892440000	29.2422	29.7332
O14981;Q59HB6;B4E0W6	TATA-binding protein-associated factor 172	BTAF1	635440000	1789300000	29.2432	30.7367
P63092-3;P63092-2;P63092;A6NI00;Q5JWF2-2;Q5JWF2;P38405;Q86XU3;F5H3J6;H0Y7F4;A2A2R6;Q5JWD1;H0Y7E8;Q5JWE9	Guanine nucleotide-binding protein G(s) subunit alpha isoforms short;Guanine nucleotide-binding protein G(s) subunit alpha isoforms XLas	GNAS	637980000	1230700000	29.2489	30.1968
Q86V81;E9PB61	THO complex subunit 4	ALYREF	639970000	7066900000	29.2534	32.7184
O75955;B4DVY7;B0V109;F8VSI6;B0S8A9;A2AB12;A2AB10;H0Y4S3;A2AB13;B0V2I8;A2AB11;B0V111;A2AB09;B0V112;B0V110;B0S8B0;B0V108;B0V114;B0V113;A2ABJ5;B0V2J0	Flotillin-1	FLOT1	640750000	517370000	29.2552	28.9466
Q9UJU6;Q9UJU6-2;Q9UJU6-3;B4DDP6;B4DDD6;H0Y5J4;B4DDU5;B4DEM2;F8WBG8;C9J7P1;F8WC20;F8WBB2;F8WFE1;F2Z2V3;F8WB73;F8WCK3;F2Z3E3	Drebrin-like protein	DBNL	641340000	1269100000	29.2565	30.2412
P53041;H0YDU8;B4DDZ8;A8MU39;E7EU14	Serine/threonine-protein phosphatase 5;Serine/threonine-protein phosphatase	PPP5C	643600000	3366000000	29.2616	31.6484
P22059;B7WNL4;H0YCV6;Q6ZN50;F5H2A3;B4DKE4;Q0VF99;Q969R2;B4DFA8;B4DTR3;Q8NA37	Oxysterol-binding protein 1	OSBP	643640000	1148300000	29.2617	30.0969
Q14978-3	Nucleolar and coiled-body phosphoprotein 1	NOLC1	643810000	126040000	29.2621	26.9093
P53990-2;P53990;P53990-4;F5H6Z7;P53990-3;A8KAH5;F5GXM3;H0YF80;F5H681;E9PF00;F5H2K5	IST1 homolog	IST1	644330000	0	29.2632	#NUM!
E7ETP2;Q96GG9;C9JVE2;C9JRU6;C9J0B2;C9JUW4;C9J8R4;F8WC32	DCN1-like protein 1;DCN1-like protein	DCUN1D1	644800000	1515400000	29.2643	30.4971
F5GXX5;P61803;F5H895	Dolichyl-diphosphooligosaccharide--protein glycosyltransferase subunit DAD1	DAD1	647080000	278770000	29.2694	28.0545
O00442;O00442-2;A6NIC1	RNA 3-terminal phosphate cyclase	RTCA	647450000	966350000	29.2702	29.848
P11498;E9PRE7;B4DN00;E9PS68	Pyruvate carboxylase, mitochondrial	PC	649580000	849090000	29.2749	29.6613
Q9UBM7;E9PMT8;E9PM00;B4E1K5;E9PJ54;E9PRL8;E9PQ71;E9PIP9;H0YE57;E9PLZ2	7-dehydrocholesterol reductase	DHCR7	649630000	787150000	29.275	29.5521
P20645;H0YGE9;H0YGT2;H0YF90;F5GXE0;F5GXU0;F5H883	Cation-dependent mannose-6-phosphate receptor	M6PR	651490000	468790000	29.2792	28.8044
Q86U42-2;Q86U42;B4DEH8;G3V4T2;Q92843-2;H0YJH9;A6NDY0-2;A6NDY0;A6NDY0-4	Polyadenylate-binding protein 2	PABPN1	654660000	1265400000	29.2862	30.2369
O43815;Q3B874;O43815-2	Striatin	STRN	654960000	780720000	29.2868	29.5402
P62316	Small nuclear ribonucleoprotein Sm D2	SNRPD2	655940000	2744700000	29.289	31.354
Q00059;A8MRB2	Transcription factor A, mitochondrial	TFAM	664170000	809230000	29.307	29.592
Q5JRG1;C9JDH3;Q9BVL2-2;A6NI12;Q9BVL2	Nucleoporin p58/p45	NUPL1	666910000	745360000	29.3129	29.4734
Q16401;B4DZM8;F2Z3J2;Q4VXH0;Q4VXG9	26S proteasome non-ATPase regulatory subunit 5	PSMD5	671610000	1520200000	29.323	30.5016
P10619;Q5JZH0;Q5JZG9	Lysosomal protective protein;Lysosomal protective protein 32 kDa chain;Lysosomal protective protein 20 kDa chain	CTSA	673030000	511830000	29.3261	28.9311
O95573;F5GWH2;F5H062;C9JC11	Long-chain-fatty-acid--CoA ligase 3	ACSL3	673590000	1702000000	29.3273	30.6646
Q96F86	Enhancer of mRNA-decapping protein 3	EDC3	674570000	2351200000	29.3294	31.1308
P36915;E9PHP0;E7ENK5;B4DWZ0;B0V0L0;E7ETJ1;P36915-2;A8MPZ0;A2AB27;B0V0L1	Guanine nucleotide-binding protein-like 1	GNL1	678070000	2156900000	29.3369	31.0063
F5H1S8;Q14165;H0YG07;F5GX14	Malectin	MLEC	678580000	625430000	29.3379	29.2203
O14776-2;O14776;G3V220;Q5VWI1	Transcription elongation regulator 1	TCERG1	679480000	4157200000	29.3399	31.953
Q96AB3;Q96AB3-2;Q96AB3-3	Isochorismatase domain-containing protein 2, mitochondrial	ISOC2	680370000	536690000	29.3417	28.9995
Q9Y244	Proteasome maturation protein	POMP	680530000	2213600000	29.3421	31.0437
Q9UI30;F5GX77;F5GYQ2	Multifunctional methyltransferase subunit TRM112-like protein	TRMT112	681230000	294220000	29.3436	28.1323
Q9H8S9;Q7L9L4;B4DRY3;Q9H8S9-2;D6RCK3	MOB kinase activator 1A;MOB kinase activator 1B	MOB1A;MOB1B	681650000	1226600000	29.3445	30.192
Q5VT79;P13928;Q5T2P8;F5GX16;Q5VT79-2;Q5VTM3;Q5T2P7;E7EVD9;B4DTC9;F5H7X5	Annexin A8-like protein 2;Annexin A8;Annexin A8-like protein 1;Annexin	ANXA8L2;ANXA8;ANXA8L1	682080000	1372900000	29.3454	30.3546
D6REX3;O94979-6;O94979-3;B7ZL00;O94979-4;O94979-2;O94979;O94979-8;D6RHZ5;O94979-7;O94979-5;H0YAB3;H0Y9T9;H0Y9K1;H0Y8V7;H0Y8W8;D6RE64;D6RCQ9;H0YAF5;D6RBT0;D6RHE8;H0Y9V3	Protein transport protein Sec31A	SEC31A	682680000	1849800000	29.3466	30.7847
Q13616;E7EWR0;B3KTW0	Cullin-1	CUL1	683870000	4363200000	29.3491	32.0227
Q9UBT2;B3KWB9;F5H4L5	SUMO-activating enzyme subunit 2	UBA2	686090000	2284300000	29.3538	31.0891
Q8NCW5;Q8NCW5-2;Q5T3I4;Q5T3I3	NAD(P)H-hydrate epimerase	APOA1BP	689130000	2527200000	29.3602	31.2349
Q5JW29;O95793-2;O95793;Q5JW30;Q5JW28	Double-stranded RNA-binding protein Staufen homolog 1	STAU1	690180000	1336400000	29.3624	30.3157
F5H1N1;Q9NVH1;Q9NVH1-3;B4DGD5;Q9NVH1-2;Q9UMU8;B1AK20;Q5TH61	DnaJ homolog subfamily C member 11	DNAJC11	697910000	620610000	29.3785	29.2091
Q66K74;B4DH53	Microtubule-associated protein 1S;MAP1S heavy chain;MAP1S light chain	MAP1S	698350000	2218300000	29.3794	31.0468
E9PC74;Q13144;H0YGE6;C9JRD9	Translation initiation factor eIF-2B subunit epsilon	EIF2B5	698360000	1082800000	29.3794	30.0121
Q5SSJ5;Q5SSJ5-2;Q5SSJ5-3;B0QZK4;Q5SWC8;B0QZK9;B0QZK8;Q5SSJ5-5	Heterochromatin protein 1-binding protein 3	HP1BP3	699960000	3083800000	29.3827	31.5221
Q9UQ35;F5GWZ7;Q9UQ35-2;Q9UQ35-3	Serine/arginine repetitive matrix protein 2	SRRM2	701090000	2442200000	29.385	31.1855
P24557;C9J8N6;E7EP08;E7ENP0;E7EMU9;E7ESB5;C9JS68;E7EP75;B7Z6W1;F8WD37;F8WC80	Thromboxane-A synthase	TBXAS1	703030000	1101000000	29.389	30.0362
Q9NXE4-2;Q9NXE4;Q9NXE4-4;E7ESA2;G8JLC4;Q9NXE4-3;B4DM23;B4E0L6;B4DWK7;B4DQ31;Q9NXE4-5;F8WF03;F2Z2I0;F2Z2W5;C9J647	Sphingomyelin phosphodiesterase 4	SMPD4	706190000	1916500000	29.3955	30.8358
Q9BZE9;Q9BZE9-2;Q9BZE9-3;C9JAL9;Q9BZE9-4	Tether containing UBX domain for GLUT4	ASPSCR1	707270000	404570000	29.3977	28.5918
P51948;H0YJ92;G3V1U8;H0YJF2	CDK-activating kinase assembly factor MAT1	MNAT1	707910000	554920000	29.399	29.0477
P04179;B3KUK2;P04179-2;F5H4R2;F5GYZ5;F5H3C5;B4E3K9;G8JLJ2;G5E9P6;F5GXZ9	Superoxide dismutase [Mn], mitochondrial	SOD2	708520000	688600000	29.4002	29.3591
P09012;B4DDC7	U1 small nuclear ribonucleoprotein A	SNRPA	709350000	1278000000	29.4019	30.2512
Q13107-2;Q13107;C9JNU9;C9IY91	Ubiquitin carboxyl-terminal hydrolase 4	USP4	709470000	1001800000	29.4022	29.8999
Q9NYY8;Q9NYY8-2;C9JPI6	FAST kinase domain-containing protein 2	FASTKD2	709770000	1724900000	29.4028	30.6839
P51148;F8W1H5;F8VWU4;F8VVK3;F8VVZ0;F8VUA5;F8VSF8;F8VPW9;F8VWZ7	Ras-related protein Rab-5C	RAB5C	710680000	605730000	29.4046	29.1741
G5EA06;Q92552;B4DRT2;D6RH20;D6RJC7;E7ETN4;E5RJ73	28S ribosomal protein S27, mitochondrial	MRPS27	713250000	482970000	29.4098	28.8474
Q5JTV8;E9PD36;H0Y4R4;C9J3B0;Q5JTV8-2;H0YD16;H0YDU3	Torsin-1A-interacting protein 1	TOR1AIP1	713850000	1147900000	29.411	30.0963
Q6P587;Q6P587-2;B1AK40	Acylpyruvase FAHD1, mitochondrial	FAHD1	714710000	922360000	29.4128	29.7808
O14979;O14979-3;O14979-2	Heterogeneous nuclear ribonucleoprotein D-like	HNRNPDL	715030000	3009000000	29.4134	31.4866
E7EPC9;E7EX17;P23588;B4DS13;F8VX11;F8VP89;F8W0K0;F8VYE9;F8VSC7;F8VRU1	Eukaryotic translation initiation factor 4B	EIF4B	717950000	346990000	29.4193	28.3703
P46109	Crk-like protein	CRKL	718950000	2298100000	29.4213	31.0978
Q9H3K6;Q9H3K6-2	BolA-like protein 2	BOLA2	720420000	2152200000	29.4243	31.0032
O15372;E5RJT0;E5RGU4;E5RFH0;E5RFW7;E5RHC7;E5RH59	Eukaryotic translation initiation factor 3 subunit H	EIF3H	721410000	5171500000	29.4262	32.2679
O76031;Q9H072;H0YN08;H0YM48;H0YK07	ATP-dependent Clp protease ATP-binding subunit clpX-like, mitochondrial	CLPX;DKFZp586J151	721580000	1425900000	29.4266	30.4092
O00154-4;O00154-6;O00154;O00154-5;B4DUX0;O00154-2;O00154-3;F5GWE2;Q6ZUV0	Cytosolic acyl coenzyme A thioester hydrolase	ACOT7	725290000	2792900000	29.434	31.3791
Q9NYK5;Q9NYK5-2;C9JG87	39S ribosomal protein L39, mitochondrial	MRPL39	727510000	1008800000	29.4384	29.91
Q96KA5-2;Q96KA5	Cleft lip and palate transmembrane protein 1-like protein	CLPTM1L	730730000	0	29.4448	#NUM!
E9PCI9;P14324	Farnesyl pyrophosphate synthase	FDPS	731920000	2049800000	29.4471	30.9328
E9PHS3;Q9BQ75;C9J384	Protein CMSS1	CMSS1	733830000	3321500000	29.4509	31.6292
Q9NRK6	ATP-binding cassette sub-family B member 10, mitochondrial	ABCB10	735070000	2129800000	29.4533	30.9881
Q9BW92;Q9H9V2;E7EVR9;Q5T5E9;B4DQF3;Q5T5F2	Threonine--tRNA ligase, mitochondrial	TARS2	736990000	391950000	29.4571	28.5461
Q9H2U1;F5GZS0;Q9H2U1-3;Q9H2U1-2;E7EWK3	ATP-dependent RNA helicase DHX36	DHX36	738660000	1729200000	29.4603	30.6875
G3V2E7;F8W6L3;G3V3H3;G3V5R9;E7EVH7;Q07866-8;Q07866-2;Q07866-3;Q07866;Q07866-7;Q07866-5;F8VTM4;Q07866-6;Q07866-4;Q07866-9;G5E9S8;A8MZ87;A8MXL7;Q9H0B6;H0YJU9;G3V2P7;H0YJL0;H0YJT3;H0YG16;E9PQ02;A8MX29;Q6P597-2;Q6P597;Q6P597-3	Kinesin light chain 1	KLC1	739340000	412860000	29.4617	28.6211
Q92990;B4DJ85;Q92990-2	Glomulin	GLMN	740620000	416630000	29.4642	28.6342
O15294;O15294-3;O15294-2;O15294-4;C9JZL3	UDP-N-acetylglucosamine--peptide N-acetylglucosaminyltransferase 110 kDa subunit	OGT	740850000	2414200000	29.4646	31.1689
E7EMJ6;O43765	Small glutamine-rich tetratricopeptide repeat-containing protein alpha	SGTA	741450000	1362600000	29.4658	30.3437
H0Y2T3;Q6IAN0	Dehydrogenase/reductase SDR family member 7B	DHRS7B	742760000	373690000	29.4683	28.4773
Q86UP2-2;Q86UP2;Q17RZ5;G3V4Y7;H0YJZ8;G3V5G2;B7Z6P3;H0YJP2;G3V5P0;H0YJV5;C9JKX0;G8JLP4;F8VTR3;Q9Y4F3-3;Q9Y4F3-4;F8VV09;Q9Y4F3-5;Q9Y4F3	Kinectin	KTN1	743500000	4201100000	29.4698	31.9681
P47813;O14602;A6NJH9	Eukaryotic translation initiation factor 1A, X-chromosomal;Eukaryotic translation initiation factor 1A, Y-chromosomal	EIF1AX;EIF1AY	745620000	855300000	29.4739	29.6719
Q9NUQ2;H0YC22;E5RH21	1-acyl-sn-glycerol-3-phosphate acyltransferase epsilon	AGPAT5	746920000	271330000	29.4764	28.0155
Q86W42;Q86W42-2;Q86W42-3	THO complex subunit 6 homolog	THOC6	747320000	1270100000	29.4772	30.2423
P50552	Vasodilator-stimulated phosphoprotein	VASP	748900000	768480000	29.4802	29.5174
Q86XI2;Q86XI2-2;E7EUH9;H0Y6U5;B4DHE5;F5H7R2;F8WE06	Condensin-2 complex subunit G2	NCAPG2	751580000	1112800000	29.4854	30.0515
Q15370;B7WPD3;B8ZZU8	Transcription elongation factor B polypeptide 2	TCEB2	753010000	1354200000	29.4881	30.3348
O96019;O96019-2;C9JQT2	Actin-like protein 6A	ACTL6A	754760000	3013000000	29.4914	31.4886
P00441;F5H503	Superoxide dismutase [Cu-Zn]	SOD1	758070000	1919500000	29.4978	30.8381
O95466;O95466-2;F5H0J2	Formin-like protein 1	FMNL1	760220000	261550000	29.5018	27.9625
Q13177;C9J2R9;H0YCG5	Serine/threonine-protein kinase PAK 2;PAK-2p27;PAK-2p34	PAK2	760590000	2070900000	29.5025	30.9476
F5H7J5;Q8N122;F5GXV9;Q8N122-2	Regulatory-associated protein of mTOR	RPTOR	762810000	0	29.5067	#NUM!
Q9UBP6;H0YIH0;F8VSD9;H0YHU4;H0YHX0	tRNA (guanine-N(7)-)-methyltransferase	METTL1	764880000	543780000	29.5107	29.0184
Q9NRG9;Q5JB47;F8VZ44;F8VUB6;F8VVJ5	Aladin	AAAS	767060000	1229100000	29.5148	30.195
Q02338;E9PCG9;C9K0G7;C9JM78;C9JQ90;C9JEB9	D-beta-hydroxybutyrate dehydrogenase, mitochondrial	BDH1	768560000	506900000	29.5176	28.9171
Q9BXS5;Q9BXS5-2;E7ENJ6;B4DDG7;Q9Y6Q5;Q9Y6Q5-2	AP-1 complex subunit mu-1	AP1M1	769890000	3017200000	29.5201	31.4906
Q8NBX0;E9PEA8	Saccharopine dehydrogenase-like oxidoreductase	SCCPDH	770910000	1095600000	29.522	30.0291
P29083;E9PER7;C9IYL4;C9J329	General transcription factor IIE subunit 1	GTF2E1	775690000	207230000	29.5309	27.6267
O14744;G3V5W5;A8MZ91;B4DX49;B4DV00;A8MTP3;G3V580;H0YJX6;G3V2X6;G3V5L5;G3V2L6;C9JSX3;H0YJ77;G3V507;G3V2F5;G3V5T6;H0YJD3	Protein arginine N-methyltransferase 5;Protein arginine N-methyltransferase 5, N-terminally processed;Protein arginine N-methyltransferase 5	PRMT5	778430000	3886900000	29.536	31.856
F5H315;Q9HCS7	Pre-mRNA-splicing factor SYF1	XAB2	780320000	1813800000	29.5395	30.7564
P60903	Protein S100-A10	S100A10	785090000	1480200000	29.5483	30.4631
C9JXG8;P43487;C9JGV6;C9JJ34;B3KUP2;B7Z6U1;C9JIC6;C9JDM3	Ran-specific GTPase-activating protein	RANBP1	785140000	1863100000	29.5484	30.7951
E7ENA9;F6Y097;Q92542-2;Q92542;H0Y6T7;E9PC09;Q5T205;H0Y3Z4;Q5T209	Nicastrin	NCSTN	785670000	615740000	29.5493	29.1977
Q7Z2T5;Q7Z2T5-2	TRMT1-like protein	TRMT1L	785700000	295930000	29.5494	28.1407
P18031;B4DSN5	Tyrosine-protein phosphatase non-receptor type 1;Tyrosine-protein phosphatase non-receptor type	PTPN1	789300000	1356900000	29.556	30.3377
O00267-2;O00267;B4DJK4	Transcription elongation factor SPT5	SUPT5H	791310000	397750000	29.5597	28.5673
P19525;E9PC80;Q05CP4;C9JZT2;F8WBH4	Interferon-induced, double-stranded RNA-activated protein kinase	EIF2AK2	791750000	1044400000	29.5605	29.96
Q8NE86-3;Q8NE86;Q8NE86-2	Calcium uniporter protein, mitochondrial	MCU	792110000	640920000	29.5611	29.2556
C9JGA8;Q70CQ2-2;Q70CQ2;B9ZVR8;Q70CQ2-3;C9JV64	Ubiquitin carboxyl-terminal hydrolase 34	USP34	792450000	654190000	29.5617	29.2851
F8W733;Q9NXR7-4;Q9NXR7-3;Q9NXR7;Q9NXR7-1;C9J2G0	BRCA1-A complex subunit BRE	BRE	798400000	454420000	29.5725	28.7595
P21399;Q9HBB2;Q59FI0;Q5VZA6;F5H2R8;F5H143;F5H3Z7;E9PEF1;E9PE88;Q6ZMR1;O00408-4;F6W5Z0;O00408	Cytoplasmic aconitate hydratase	ACO1;IRP1	798520000	2063400000	29.5728	30.9424
Q5QPM7;Q92530;F5H4Z3;E7ER20;E9PCH7;Q5QPM9;H0Y555	Proteasome inhibitor PI31 subunit	PSMF1	799060000	2114900000	29.5737	30.9779
P30419-2;P30419;B7Z8J4;E9PE74	Glycylpeptide N-tetradecanoyltransferase 1	NMT1	801600000	2021900000	29.5783	30.9131
Q8IX12-2;Q8IX12;F5H2E6;F5H1H2;F5H3E1;H0YFJ7;F5H218;F5H7M9	Cell division cycle and apoptosis regulator protein 1	CCAR1	803710000	2747900000	29.5821	31.3557
O60701;O60701-2;B4DN25;E7ER83;E7ETF4;E7EV97;E7ER95;D6RHF4;E9PBD2	UDP-glucose 6-dehydrogenase	UGDH	804900000	1284000000	29.5842	30.258
Q14997;Q14997-2;F8WB44;Q14997-3;F8WBH5;Q14997-4	Proteasome activator complex subunit 4	PSME4	805670000	1413100000	29.5856	30.3962
P23258;Q9NRH3	Tubulin gamma-1 chain;Tubulin gamma-2 chain	TUBG1;TUBG2	806720000	3034200000	29.5875	31.4987
Q9UHD8-7;Q9UHD8-2;Q9UHD8-5;Q9UHD8;Q9UHD8-3;Q9UHD8-4;Q9UHD8-9;Q9UHD8-8;F5GWR9	Septin-9	2016-09-09	811010000	2933200000	29.5951	31.4498
Q9H1A4;H0Y564;F8WAS1	Anaphase-promoting complex subunit 1	ANAPC1	811690000	1779100000	29.5964	30.7285
P28331;B4DUC1;E7ENF3;B4DJ81;B4DPG1;C9JPQ5;F8WDL5	NADH-ubiquinone oxidoreductase 75 kDa subunit, mitochondrial	NDUFS1	812520000	3941400000	29.5978	31.8761
O75937	DnaJ homolog subfamily C member 8	DNAJC8	816470000	368030000	29.6048	28.4552
P61513;C9J4Z3;E9PEL3;G5E9R3;A6NKH3	60S ribosomal protein L37a	RPL37A	816560000	549890000	29.605	29.0346
Q8TBC4-2;Q8TBC4;F8W8D4;B7Z5F6;F8WF86	NEDD8-activating enzyme E1 catalytic subunit	UBA3	818390000	1014000000	29.6082	29.9174
P53992;E7EP00;G5EA31;B4DZT4	Protein transport protein Sec24C	SEC24C	818710000	3050100000	29.6088	31.5062
E7ES08;E7EQU1;O15347;E9PES6;P0C6E5	High mobility group protein B3	HMGB3	820740000	1908300000	29.6124	30.8296
P56537;B7ZBG9;B7ZBH1;F8WD20;F8WDS6	Eukaryotic translation initiation factor 6	EIF6	820860000	2092300000	29.6126	30.9624
Q8N201;E9PBV8	Integrator complex subunit 1	INTS1	821430000	869790000	29.6136	29.6961
Q9UGP8;E7EQH7;H0Y611;A6PVC9	Translocation protein SEC63 homolog	SEC63	821740000	2184700000	29.6141	31.0248
Q9Y4A5-2;Q9Y4A5;F2Z2U4;H0Y4W2	Transformation/transcription domain-associated protein	TRRAP	823680000	3579600000	29.6175	31.7372
B4DWW1;P40616;F8VYN9;B4DZG7;F8VP99;F8W1Z8;F8VP63	ADP-ribosylation factor-like protein 1	ARL1	826700000	1202700000	29.6228	30.1636
C9JBI3;P78330;C9JEJ7;F8WD74	Phosphoserine phosphatase	PSPH	826820000	2379000000	29.623	31.1477
P09543-2;P09543;F8W7I0;C9K0L8	2,3-cyclic-nucleotide 3-phosphodiesterase	CNP	828490000	895920000	29.6259	29.7388
Q9NRY4-2;Q9NRY4;A2RRE5	Rho GTPase-activating protein 35	ARHGAP35;GRLF1	828900000	3499500000	29.6266	31.7045
Q86YV0-2;Q86YV0	RAS protein activator like-3	RASAL3	831690000	544390000	29.6315	29.0201
Q15125;C9J719;C9JJ78	3-beta-hydroxysteroid-Delta(8),Delta(7)-isomerase	EBP	832110000	2404600000	29.6322	31.1631
P62273;A8MZ73	40S ribosomal protein S29	RPS29	832240000	146640000	29.6324	27.1277
Q93008-1;Q93008;O00507;O00507-2;E9PFG1	Probable ubiquitin carboxyl-terminal hydrolase FAF-X	USP9X	833540000	3287000000	29.6347	31.6141
Q9Y2W1	Thyroid hormone receptor-associated protein 3	THRAP3	837360000	656820000	29.6413	29.2909
Q9Y3T9	Nucleolar complex protein 2 homolog	NOC2L	839790000	2470300000	29.6455	31.202
Q6IBS0;D6RG15;H0Y858;Q9NR96-4	Twinfilin-2	TWF2	842370000	1840600000	29.6499	30.7775
P49916;P49916-2	DNA ligase 3	LIG3	842460000	2367000000	29.65	31.1404
F8VXY1;Q8N5B7;H0YI10;B4DV54;Q49AQ3;F8W0U5;F8W1K4;F8W1Z3;F8W1N7;F8VQZ6;H0YIG1;F8VY42;F8VSK7;H0YHG4;B4DQR7	Ceramide synthase 5	CCDC97;CERS5;LASS5	843090000	0	29.6511	#NUM!
O00411;E9PDE7	DNA-directed RNA polymerase, mitochondrial	POLRMT	844450000	1360800000	29.6534	30.3418
F5GYQ8;Q15067-2;F5H0M0;Q15067	Peroxisomal acyl-coenzyme A oxidase 1	ACOX1	846190000	0	29.6564	#NUM!
B4DUE3;Q15746-7;Q15746-4;Q15746-5;Q15746-2;Q15746-3;Q15746-6;Q15746;Q15746-8	Myosin light chain kinase, smooth muscle;Myosin light chain kinase, smooth muscle, deglutamylated form	MYLK	849880000	568630000	29.6627	29.0829
E7EQD1;P62995;P62995-3	Transformer-2 protein homolog beta	TRA2B	857580000	748830000	29.6757	29.4801
Q8NFW8;Q8NFW8-2;F5GYM0;F5H296	N-acylneuraminate cytidylyltransferase	CMAS	857610000	545300000	29.6757	29.0225
B7Z560;Q9NV88;G3XAN1;H0YG17;H0YBH8;E5RG70;E5RK47;E5RJ88;H0YBK3	Integrator complex subunit 9	INTS9	859450000	508850000	29.6788	28.9227
Q969U7;F5H4W8	Proteasome assembly chaperone 2	PSMG2	863110000	0	29.685	#NUM!
Q09666;Q8N274;E9PJZ0;E9PKR9;E9PJC6;E9PLK4;A1A586;E9PQE3;E9PLZ1	Neuroblast differentiation-associated protein AHNAK	AHNAK	865910000	16422000000	29.6896	33.9349
B1AHD1;P55769	NHP2-like protein 1;NHP2-like protein 1, N-terminally processed	NHP2L1	866060000	536540000	29.6899	28.9991
E9PK91;Q9NYF8-3;Q9NYF8-2;Q9NYF8;E9PK09;E9PQN2;E9PKI6;Q9NYF8-4;E9PJA7;H0YF00;H0YF63;H0YF14	Bcl-2-associated transcription factor 1	BCLAF1	866170000	1671100000	29.6901	30.6382
O75400;F8W9L2;O75400-2;O75400-3;E9PHJ7;F5H578;H0YG38;Q6NWY9-2;Q6NWY9-3;Q6NWY9;B5MD60	Pre-mRNA-processing factor 40 homolog A	PRPF40A	866910000	3790000000	29.6913	31.8196
P30154;P30154-2;F8W8G1;B4DWW5;A8MY67;E7EUF3;H0YDG7	Serine/threonine-protein phosphatase 2A 65 kDa regulatory subunit A beta isoform	PPP2R1B	872900000	531620000	29.7012	28.9858
P21333-2;P21333;Q5HY54;E9PHF0;E7EWU2;H0Y5C6;H0Y5F3	Filamin-A	FLNA	873330000	2019800000	29.702	30.9116
E7EUB4;Q99459	Cell division cycle 5-like protein	CDC5L	875520000	4416900000	29.7056	32.0404
Q9UL25	Ras-related protein Rab-21	RAB21	875830000	501590000	29.7061	28.9019
B4DXZ6;P51114-2;P51114;E9PFF5;E7EU85;E7ERF5;P51114-3;C9JZE0;C9JY20;C9JAJ4;C9IZ22;C9J5B4	Fragile X mental retardation syndrome-related protein 1	FXR1	879220000	1806000000	29.7116	30.7502
G5E9W7;G5E9V5;P82650;Q9H3I1;E9PGX2;C9J5D8	28S ribosomal protein S22, mitochondrial	MRPS22	880810000	943200000	29.7143	29.813
F5GXL8;P09110;C9JDE9;G5E935;H0Y4D4;B4E072;B4DVF4	3-ketoacyl-CoA thiolase, peroxisomal	ACAA1	884240000	512570000	29.7199	28.9332
Q5QPK2;H0Y368;E9PBD4;O60762;E9PHH5;Q5QPJ9	Dolichol-phosphate mannosyltransferase subunit 1	DPM1	885140000	1552000000	29.7213	30.5315
Q96EP5;Q96EP5-2	DAZ-associated protein 1	DAZAP1	885480000	217000000	29.7219	27.6931
Q14145	Kelch-like ECH-associated protein 1	KEAP1	886730000	1279100000	29.7239	30.2525
P55795;B4DFK9	Heterogeneous nuclear ribonucleoprotein H2;Heterogeneous nuclear ribonucleoprotein H2, N-terminally processed	HNRNPH2	894620000	1528100000	29.7367	30.5091
Q9H0H0	Integrator complex subunit 2	INTS2	894870000	266050000	29.7371	27.9871
Q9Y221;Q9Y221-2	60S ribosome subunit biogenesis protein NIP7 homolog	NIP7	895880000	2315100000	29.7387	31.1084
Q9BSJ2;F5H4L0;F5H4E0;F2Z2B9;B3KTU7	Gamma-tubulin complex component 2	TUBGCP2	900230000	3129700000	29.7457	31.5434
Q08257;A6NN60;A6NP24;C9JH92;Q5HYE7	Quinone oxidoreductase	CRYZ	902420000	1076200000	29.7492	30.0033
P30405;H0Y548;Q2YDB7	Peptidyl-prolyl cis-trans isomerase F, mitochondrial	PPIF	906020000	2516100000	29.755	31.2285
Q9UBD5;Q9UBD5-2;E7ENV6;B4E025;B4DZ51	Origin recognition complex subunit 3	ORC3	906090000	727060000	29.7551	29.4375
O43324;D6RBD7;C9J1V9;C9JLK5;H0YAL7;H0YAH9;D6RCQ0	Eukaryotic translation elongation factor 1 epsilon-1	EEF1E1;EEF1E1-BLOC1S5	909780000	1425800000	29.7609	30.4091
Q13867;E7EMN3	Bleomycin hydrolase	BLMH	911270000	953560000	29.7633	29.8287
Q9BY44;B4DQ14;F8WAE5;B4DF96;Q9BY44-2;C9IZE1;F8WF18;F8WAT3	Eukaryotic translation initiation factor 2A;Eukaryotic translation initiation factor 2A, N-terminally processed	EIF2A	912420000	3800400000	29.7651	31.8235
Q15102	Platelet-activating factor acetylhydrolase IB subunit gamma	PAFAH1B3	913710000	2303000000	29.7672	31.1009
Q13547;Q5TEE2;F5GXM1	Histone deacetylase 1	HDAC1	914530000	1619400000	29.7685	30.5928
B7Z8G2;Q13451;B7Z7Z8;H0Y3A5;F5H7R1	Peptidyl-prolyl cis-trans isomerase FKBP5	FKBP5	915200000	1472100000	29.7695	30.4552
Q16850;F5H3N4;Q16850-2;C9IYR8	Lanosterol 14-alpha demethylase	CYP51A1	916240000	1336000000	29.7712	30.3153
Q8IZL8;C9JFV4;Q8IZL8-2;F8WDZ1;E7EV54	Proline-, glutamic acid- and leucine-rich protein 1	PELP1	916590000	2210300000	29.7717	31.0416
P80303-2;P80303;E9PKG6;E7EV42;E9PLR0;E9PLE9;E9PM22;E9PJP3;H0YEG8;H0YD18;C9JBD3;C9J3C1	Nucleobindin-2;Nesfatin-1	NUCB2;DCAF5	916890000	1459700000	29.7722	30.443
P27635;A6QRI9;Q96L21;B8A6G2	60S ribosomal protein L10	RPL10	917520000	752580000	29.7732	29.4873
E7EN32;O00255-2;O00255;O00255-3;E7EPR4;E7ET29;E7ENY6;E7ENS2;Q9GZQ5	Menin	MEN1	917570000	272640000	29.7732	28.0224
P49792;E9PGT0;Q99666-2;F8W705;H0YBN8;C9JRL5;C9J6W1;C9J149;Q7Z3J3-2;C9J1W9;C9JF75;F8WBP7;F8WB60;C9J1P2	E3 SUMO-protein ligase RanBP2	RANBP2	920920000	4733400000	29.7785	32.1402
G3V1U4;Q9UHB9;F5H5Y3;E7ETK6;Q9UHB9-2;F5H281;Q96K98;B3KUU5	Signal recognition particle subunit SRP68	SRP68	921480000	2229000000	29.7794	31.0537
D3YTB1;F8W727;P62910;D3YTI8	60S ribosomal protein L32	RPL32	923530000	8212100000	29.7826	32.9351
Q92688-2;Q92688;Q5T6W8	Acidic leucine-rich nuclear phosphoprotein 32 family member B	ANP32B	924240000	1035600000	29.7837	29.9478
E7ES17;O00291;C9JMG5	Huntingtin-interacting protein 1	HIP1	925370000	1730800000	29.7855	30.6888
Q96C19;C9JTI6;H0Y4Y4;B4DEE0;E9PFH3;C9JTV4;Q8WYH2	EF-hand domain-containing protein D2	EFHD2	927940000	973070000	29.7895	29.858
Q5JRI1;B4DJP9;O75494-4;Q5JRI3;O75494-3;O75494-2;O75494;Q8WXF0	Serine/arginine-rich splicing factor 10	SRSF10	932100000	1454000000	29.7959	30.4374
D6RHI9;C9JIU8;O00584;D6REQ6;H0YAE9;Q5TCT1;E7ET60;O00584-2	Ribonuclease T2	RNASET2	937230000	1192700000	29.8038	30.1516
Q9UI26;Q9UI26-2;F8WDV0;F5H4Y1;H0Y8M5;D6RJB1;D6RCN7;E7EMB7	Importin-11	IPO11	937250000	2271000000	29.8039	31.0807
Q8WVC2;Q9BYK1;P63220;Q9BYK2;Q13666	40S ribosomal protein S21	RPS21	938100000	1775300000	29.8052	30.7254
Q5SRQ6;P67870;Q5SRQ3	Casein kinase II subunit beta	CSNK2B;CSNK2B-LY6G5B-1181	940020000	2484300000	29.8081	31.2102
O95674;E7EQ83;F6VWC5	Phosphatidate cytidylyltransferase 2	CDS2	940060000	340110000	29.8082	28.3414
Q99808	Equilibrative nucleoside transporter 1	SLC29A1	940910000	1470400000	29.8095	30.4536
Q96N66;Q96N66-2;Q96N66-3;A9C4B8;C9J4E9	Lysophospholipid acyltransferase 7	MBOAT7	941720000	936010000	29.8107	29.8019
Q9BY32;A2A2N2;Q9BY32-2	Inosine triphosphate pyrophosphatase	ITPA	944700000	2339600000	29.8153	31.1236
Q8IWX8	Calcium homeostasis endoplasmic reticulum protein	CHERP	946310000	2395700000	29.8177	31.1578
H0Y7A7;P62158;E7ETZ0;E7EMB3;F8WBR5;G3V479;Q96HY3;P27482;G3V361;C9J7T9;P02585	Calmodulin	CALM2;CALM1	947490000	1958300000	29.8195	30.867
Q9HD45;Q5TB53	Transmembrane 9 superfamily member 3	TM9SF3	948070000	1435800000	29.8204	30.4192
P26196;Q8IV96	Probable ATP-dependent RNA helicase DDX6	DDX6	948450000	3829200000	29.821	31.8344
O00410;H0Y8C6;O00410-3;B4E0R6;C9JMV5;E7ETV3;H0Y3V4;E7EQT5;E7EV12;E7EWK4;E7EX05;C9JZD8;C9JQT6;E7ESA1;E7ESZ1;E7ETV8;C9J875	Importin-5	IPO5	952790000	965670000	29.8276	29.847
Q8NC51;Q8NC51-3;Q8NC51-2;Q8NC51-4	Plasminogen activator inhibitor 1 RNA-binding protein	SERBP1	956580000	1699000000	29.8333	30.662
Q04917;A2IDB2;F8WEB6;A2IDB1	14-3-3 protein eta	YWHAH	958020000	868450000	29.8355	29.6939
F5GWP1;Q92575;F8WB86;Q6PJ80;C9JLR4	UBX domain-containing protein 4	UBXN4	959050000	681610000	29.837	29.3444
Q86XP3;Q86XP3-2	ATP-dependent RNA helicase DDX42	DDX42	961350000	3301100000	29.8405	31.6203
F5H425;O75822;B4DUI3;H0YLP3;H0YGJ7	Eukaryotic translation initiation factor 3 subunit J	EIF3J	964130000	892890000	29.8447	29.7339
A6NFN4;Q13564;A8MU28;A6NCK0	NEDD8-activating enzyme E1 regulatory subunit	NAE1	965410000	318540000	29.8466	28.2469
B7Z1R5;P38606;B7Z2V6;C9JA17;C9JVW8	V-type proton ATPase catalytic subunit A	ATP6V1A	968360000	3728800000	29.851	31.7961
Q9NWW5;B4DDH6;E7ESV1	Ceroid-lipofuscinosis neuronal protein 6	CLN6	971270000	682220000	29.8553	29.3457
P08574	Cytochrome c1, heme protein, mitochondrial	CYC1	973000000	1071700000	29.8579	29.9973
P51648;P51648-2;C9JGJ2;E9PJV0;C9JKT2;C9JMC5;A8MYB8;E9PNN6;E7ERM4;H0Y3F3;P48448;P43353-2;P30838;P43353	Fatty aldehyde dehydrogenase	ALDH3A2	973930000	2884000000	29.8592	31.4254
O60256;B7ZKZ1;E7EMY2;E7EPA1;B4E329;C9JJS3;C9K0K7;C9JDU5;C9JDH0;C9JLZ5	Phosphoribosyl pyrophosphate synthase-associated protein 2	PRPSAP2	976150000	1196600000	29.8625	30.1563
Q9Y5U8;Q5TI65	Mitochondrial pyruvate carrier 1	MPC1;BRP44L	977080000	0	29.8639	#NUM!
B4DP59;E7EM60;P51398	28S ribosomal protein S29, mitochondrial	DAP3	978290000	2357300000	29.8657	31.1345
P43686;P43686-2	26S protease regulatory subunit 6B	PSMC4	985280000	10382000000	29.876	33.2734
P25098;E9PRV7;P35626;Q8N433	Beta-adrenergic receptor kinase 1	ADRBK1	985780000	4885500000	29.8767	32.1859
O60568;F5H723	Procollagen-lysine,2-oxoglutarate 5-dioxygenase 3	PLOD3	987830000	1075800000	29.8797	30.0028
E9PEN8;Q9UIA9;E7ESC6;H0YBE1;E5RIW1	Exportin-7	XPO7	989970000	1358100000	29.8828	30.3389
Q96DV4;B3KN96;B8ZZ57	39S ribosomal protein L38, mitochondrial	MRPL38	991230000	1718300000	29.8846	30.6783
Q9Y277;F5H740;Q9Y277-2;E5RJN6;E5RHZ6;E5RFP6;E5RHE1;E5RK27;F8W7Y3;E5RFL1	Voltage-dependent anion-selective channel protein 3	VDAC3	993790000	3121400000	29.8884	31.5395
A6PVN5;Q15257-2;Q15257;Q15257-3;B4DZF8;A6PVN9;Q15257-4;Q5T949;Q5T948;Q68CR8;A6PVN6;B7ZBQ0;A6PVN8;A6PVN7;C9IZ76;B7ZBP9;B7ZBP7;B4DDQ6;H0Y6E5	Serine/threonine-protein phosphatase 2A activator	PPP2R4;DKFZp781M17165	999580000	962790000	29.8967	29.8426
P08240;E9PJS4	Signal recognition particle receptor subunit alpha	SRPR	1000000000	1463900000	29.8974	30.4472
E9PDE8;E7ES43;O95757;D6RJ96	Heat shock 70 kDa protein 4L	HSPA4L	1002200000	0	29.9005	#NUM!
O94776;Q68DB1	Metastasis-associated protein MTA2	MTA2	1003000000	3805600000	29.9017	31.8255
D6RBV2;Q12907;B4DWN1;D6RIU4;D6RDX1;D6RBH1	Vesicular integral-membrane protein VIP36	LMAN2	1003900000	4328100000	29.903	32.0111
Q00688;G3V5F2	Peptidyl-prolyl cis-trans isomerase FKBP3	FKBP3	1004800000	2308200000	29.9043	31.1041
B4DT77;B4DHY4;P20073-2;P20073	Annexin;Annexin A7	ANXA7	1007000000	1102600000	29.9074	30.0383
Q99986;H0YJ50;H0YJJ9	Serine/threonine-protein kinase VRK1	VRK1	1008600000	2152500000	29.9097	31.0034
G5E9A6;P51784;Q5JXD3	Ubiquitin carboxyl-terminal hydrolase;Ubiquitin carboxyl-terminal hydrolase 11	USP11	1011400000	692490000	29.9137	29.3672
P10155;Q5LJ98;Q5LJA0;Q5LJ99;G5E9R9;P10155-2;H0Y9N5	60 kDa SS-A/Ro ribonucleoprotein	TROVE2	1014300000	3022200000	29.9178	31.493
P14317;E7EVW7;B4DQ69	Hematopoietic lineage cell-specific protein	HCLS1	1015600000	5028100000	29.9197	32.2274
Q9UBB4;E7ESH8;Q9UBB4-2;B1AHE4;E9PCY2;H0Y7N2;B1AHE3	Ataxin-10	ATXN10	1016600000	1962500000	29.9211	30.87
E9PGR0;E7EQ55;Q5LJA5;Q5LJA9;Q9Y5K5-2;Q9Y5K5-4;Q9Y5K5-3;Q9Y5K5;H0Y6Y4;Q5LJB0;B4DW59;B7Z9U9;H0Y4E0;H0Y636;H0Y4K0	Ubiquitin carboxyl-terminal hydrolase isozyme L5	UCHL5	1017800000	1180900000	29.9228	30.1372
P31949	Protein S100-A11;Protein S100-A11, N-terminally processed	S100A11	1024800000	1785900000	29.9327	30.734
P61026	Ras-related protein Rab-10	RAB10	1027300000	728040000	29.9362	29.4394
Q5JWT2;Q9ULK4-4;Q9ULK4-5;Q9ULK4-3;Q9ULK4;F5H4T7;F5H685;Q9ULK4-2;B9TX55;F5H0J5	Mediator of RNA polymerase II transcription subunit 23	MED23	1027600000	1540800000	29.9366	30.521
Q9NXH9;Q9NXH9-2	tRNA (guanine(26)-N(2))-dimethyltransferase	TRMT1	1035800000	907070000	29.9481	29.7566
P35249;C9JZI1;C9J8M3;C9JTT7;C9JXZ7;C9JGY5;F8WE44;C9JW34	Replication factor C subunit 4	RFC4	1039000000	2322900000	29.9525	31.1133
Q8IX01-4;Q8IX01-3;Q8IX01;E7ETX7	SURP and G-patch domain-containing protein 2	SUGP2	1039800000	1158500000	29.9537	30.1096
Q8TCS8;F8WBI3	Polyribonucleotide nucleotidyltransferase 1, mitochondrial	PNPT1	1041200000	2844200000	29.9556	31.4054
Q9NQG5;E9PIQ9;E9PQF3;A2A2M0	Regulation of nuclear pre-mRNA domain-containing protein 1B	RPRD1B	1046500000	2131300000	29.9629	30.9891
B0I1T2;B0I1T2-4;B0I1T2-3;F8WEW9;B0I1T2-2	Unconventional myosin-Ig;Minor histocompatibility antigen HA-2	MYO1G	1051900000	3813900000	29.9704	31.8286
E7EU18;Q9Y679-2;Q9Y679;G8JLM8;Q9Y679-3	Ancient ubiquitous protein 1	AUP1	1061900000	2193200000	29.984	31.0304
Q9NZ08;Q9NZ08-2;H0Y9X5;D6RAL9	Endoplasmic reticulum aminopeptidase 1	ERAP1	1062500000	407700000	29.9848	28.6029
Q14696	LDLR chaperone MESD	MESDC2	1063000000	234480000	29.9855	27.8049
H0YBB9;O94903;E5RFX7;E5RG77;H0YBG2;E5RH70;E5RFZ4	Proline synthase co-transcribed bacterial homolog protein	PROSC	1066100000	1074700000	29.9897	30.0013
O00743-2;O00743;O00743-3;B7Z3E2;Q5T1S7	Serine/threonine-protein phosphatase 6 catalytic subunit;Serine/threonine-protein phosphatase 6 catalytic subunit, N-terminally processed	PPP6C	1067500000	1077500000	29.9916	30.005
B4DG62;E7ENR4;P19367-4;P19367-2;P19367;P19367-3;Q2TB90;B1AR62;B1AR61;B1AR63	Hexokinase-1	HK1	1068100000	181500000	29.9924	27.4354
Q9UKZ1	CCR4-NOT transcription complex subunit 11	CNOT11	1070400000	459910000	29.9955	28.7768
P62136;Q07161;E9PDP1;A6NNR3;E9PMD7;H0Y3Y6;F5H1L6;F5H037;F8WE71	Serine/threonine-protein phosphatase PP1-alpha catalytic subunit;Serine/threonine-protein phosphatase	PPP1CA	1070600000	1548500000	29.9958	30.5282
Q9UHG3;B7Z3Y2;B7Z9P8;F8W8W4;C9K055;C9JM55;C9JGT6	Prenylcysteine oxidase 1	PCYOX1	1075400000	3408200000	30.0022	31.6664
P27694	Replication protein A 70 kDa DNA-binding subunit;Replication protein A 70 kDa DNA-binding subunit, N-terminally processed	RPA1	1076300000	2042700000	30.0034	30.9278
Q5VT94;F5GZL5;Q9H3K2;Q9Y6G2	Growth hormone-inducible transmembrane protein	GHITM	1076900000	1236300000	30.0042	30.2034
Q9BZE1;E9PB99;A6NHR2;H0Y4J2	39S ribosomal protein L37, mitochondrial	MRPL37	1078300000	1003100000	30.0061	29.9018
P84098	60S ribosomal protein L19	RPL19	1081900000	805550000	30.0109	29.5854
Q8NHQ9;F5H5U2;F5H3E5;E7EX41;Q8IYH0;F5H2I2;F5H735	ATP-dependent RNA helicase DDX55	DDX55	1089800000	466740000	30.0214	28.798
Q15008;C9IZE4;E9PHI9;Q6UV22;C9J0E9;C9J7B7	26S proteasome non-ATPase regulatory subunit 6	PSMD6	1094300000	3352900000	30.0274	31.6428
O00422	Histone deacetylase complex subunit SAP18	SAP18	1095900000	717730000	30.0295	29.4189
Q5JUR7;Q5JUR8;Q5JUS0	Testis-expressed sequence 30 protein	TEX30	1097800000	0	30.032	#NUM!
P62495;B7Z7P8;Q96CG1;D6RJE8;D6RCB3	Eukaryotic peptide chain release factor subunit 1	ETF1	1098300000	2827700000	30.0326	31.397
P67775;P62714;E5RHC1;H0YC23;E5RFI3;E5RHP4;E7ESG8;H0YBN9;E5RI56	Serine/threonine-protein phosphatase 2A catalytic subunit alpha isoform;Serine/threonine-protein phosphatase 2A catalytic subunit beta isoform;Serine/threonine-protein phosphatase	PPP2CA;PPP2CB	1100200000	3585300000	30.0351	31.7394
E9PDK5;B4DVE7;P50995;H0Y6E1;E9PDS7;Q5T0G9	Annexin A11	ANXA11	1101900000	2809000000	30.0373	31.3874
C9J9G0;Q8WVV9-4;Q8WVV9;B7WPG3;Q5JB52;C9IYN3;Q8WVV9-3;Q8WVV9-2;C9JJZ7	Heterogeneous nuclear ribonucleoprotein L-like	HNRNPLL;HNRPLL	1102500000	1862800000	30.0381	30.7948
Q05209;E9PEH9;E9PBR5;B4E105;H0YC15;C9J1X8;F8WB51;C9JJC1	Tyrosine-protein phosphatase non-receptor type 12	PTPN12	1102800000	206010000	30.0385	27.6181
Q9UIG0-2;Q9UIG0	Tyrosine-protein kinase BAZ1B	BAZ1B	1109500000	5567300000	30.0473	32.3743
E9PER8;O75915;F8WF90;C9JQU6;F8WF33;B4DWQ6	PRA1 family protein 3	ARL6IP5	1114300000	906240000	30.0535	29.7553
P15121;E9PCX2;E9PEF9;C9JRZ8-2;C9JRZ8	Aldose reductase	AKR1B1	1115200000	8075800000	30.0547	32.911
Q7Z2Q5;Q13363;D6RAX2;E7ESU7;E7EPF8;E9PGB1;H0Y8W7;H0Y9M9;H0Y8U5	C-terminal-binding protein 1	CTBP1	1115300000	3575600000	30.0548	31.7355
Q9NX58;D6RDJ1	Cell growth-regulating nucleolar protein	LYAR	1117500000	4585000000	30.0576	32.0943
Q96EY7;Q96EY7-2;B8ZZQ4;B4DF73	Pentatricopeptide repeat domain-containing protein 3, mitochondrial	PTCD3	1122200000	2375800000	30.0637	31.1458
Q5SRE5;F8W973;Q5SRE5-2;E9PET9;F2Z376	Nucleoporin NUP188 homolog	NUP188	1123200000	2824400000	30.065	31.3953
P28072	Proteasome subunit beta type-6	PSMB6	1124200000	867480000	30.0663	29.6923
P18206-2;P18206;F5H7T3;Q5JQ13;G8JLL3;F5H5H8;B4DTM7;P18206-3	Vinculin	VCL	1129700000	1210800000	30.0733	30.1733
P51991;P51991-2;E7EWI9;E7ERJ4	Heterogeneous nuclear ribonucleoprotein A3	HNRNPA3	1132100000	8733500000	30.0764	33.0239
P49406	39S ribosomal protein L19, mitochondrial	MRPL19	1138800000	709850000	30.0849	29.4029
P18621;B4E3C2	60S ribosomal protein L17	RPL17	1144600000	8993100000	30.0922	33.0662
P13073	Cytochrome c oxidase subunit 4 isoform 1, mitochondrial	COX4I1	1144800000	1500600000	30.0924	30.4829
G3V529;Q9GZR7;Q4V9L5;F5H4J5;F5H4V3;F5GYL3;E7ETZ2	ATP-dependent RNA helicase DDX24	DDX24	1146700000	1645900000	30.0948	30.6162
P40925;F5H098;B4DUN2;B9A041;B8ZZ51;C9JF79;C9JRL4;C9JLV6;C9IZI0;F8WFC2	Malate dehydrogenase, cytoplasmic;Malate dehydrogenase	MDH1	1151500000	4185600000	30.1009	31.9628
F5H1W9;O95232;B4DJ96;D6RDI2;D6RHH0;C9JL41;O95232-2;E7EN55	Luc7-like protein 3	LUC7L3	1153400000	1465800000	30.1032	30.449
Q13423;E9PCX7;D6RAI5;F5H8A9;B4DMN9;D6RHU2;D6RCR6;H0Y8P5	NAD(P) transhydrogenase, mitochondrial	NNT	1158700000	1357500000	30.1099	30.3383
Q13310-2;Q4VC03;B1ANR0;Q13310;H0Y5F5;H0YEU6;H0YCC8;H0YEQ8;B1ANR1;H0Y6X6;E9PBN1;H0YER0	Polyadenylate-binding protein 4	PABPC4	1160000000	2243900000	30.1115	31.0634
Q9NVI7-2;Q9NVI7;H0Y2W2;G3V1I6;E9PDY1;Q5SV15;Q5T9A4-2;Q5T9A2;A6NFL3;Q5SV14	ATPase family AAA domain-containing protein 3A	ATAD3A	1162700000	2730000000	30.1148	31.3463
O75534;G5E9Q2;O75534-2;E9PGZ0;E9PLT0;E9PNG3;E9PLD4;E9PJK7	Cold shock domain-containing protein E1	CSDE1	1168200000	2444200000	30.1216	31.1867
F5H3H6;Q9BQ39	ATP-dependent RNA helicase DDX50	DDX50	1171100000	3209600000	30.1252	31.5797
E9PFW3;Q96CW1-2;Q96CW1;F5H0H0;C9JJ47;B4DJB1;C9JTK4;C9JGT8;C9JJD3;C9JPV8	AP-2 complex subunit mu	AP2M1	1171700000	2023200000	30.126	30.914
P10620;F5H7F6;F5H6X2;G5EA53;F5H760;F5GX73;F5H613	Microsomal glutathione S-transferase 1	MGST1	1172900000	2518500000	30.1274	31.2299
Q96HS1;Q96HS1-2;F5GXG4	Serine/threonine-protein phosphatase PGAM5, mitochondrial	PGAM5	1175000000	2276500000	30.13	31.0842
P36957;B7Z5W8;Q86SW4;H0YJF9;G3V5M3;G3V3F0	Dihydrolipoyllysine-residue succinyltransferase component of 2-oxoglutarate dehydrogenase complex, mitochondrial	DLST	1176700000	865210000	30.1321	29.6885
Q02809;B4DR87;E7EWK8;Q5JXB9;Q5JXB7;Q5JXB8	Procollagen-lysine,2-oxoglutarate 5-dioxygenase 1	PLOD1	1177300000	1093000000	30.1328	30.0256
G3V5T9;P24941;P24941-2;E7ESI2;Q00526;G3V317;B3KX76;Q96Q40-2;Q96Q40-4;Q96Q40-3;F8W6H8;Q96Q40;Q07002;Q07002-2;Q07002-3	Cyclin-dependent kinase 2	CDK2	1180600000	2009100000	30.1369	30.9039
Q9BYD1;E5RJI7;H0YAX3;E5RFI2	39S ribosomal protein L13, mitochondrial	MRPL13	1182500000	1865000000	30.1392	30.7965
Q9H773	dCTP pyrophosphatase 1	DCTPP1	1183600000	3407700000	30.1405	31.6662
Q8WYA6;Q8WYA6-3;Q8WYA6-2;C9JS85;A2A2P1	Beta-catenin-like protein 1	CTNNBL1	1185300000	2654900000	30.1426	31.306
P62191;B4DR63;G3V4X1	26S protease regulatory subunit 4	PSMC1	1186900000	6494600000	30.1446	32.5966
F8WAN8;Q9H845;H0Y8Z9	Acyl-CoA dehydrogenase family member 9, mitochondrial	ACAD9	1188400000	709670000	30.1464	29.4026
Q8IWA0;F8WE20;F8WC81	WD repeat-containing protein 75	WDR75	1189600000	1707300000	30.1478	30.6691
Q04760-2;Q04760	Lactoylglutathione lyase	GLO1	1189800000	2651700000	30.1481	31.3043
P82673;P82673-2;H0YG82	28S ribosomal protein S35, mitochondrial	MRPS35	1195500000	1019100000	30.155	29.9246
P30085;E7EVE6;Q5T0D2;E9PGI8	UMP-CMP kinase	CMPK1	1197000000	1157800000	30.1568	30.1087
B4DNJ6;Q9Y3F4;B0AZV0;H0YH33;F5H1G1	Serine-threonine kinase receptor-associated protein	STRAP	1198900000	6163300000	30.1591	32.5211
Q9UBU9;E9PIN3;Q9UBU9-2;E9PLA7;B4E3J0;H0YDU0;E9PMV7	Nuclear RNA export factor 1	NXF1	1199400000	1135300000	30.1597	30.0804
O95486;O95486-2	Protein transport protein Sec24A	SEC24A	1205700000	806190000	30.1672	29.5865
B4DL14;P36542-2;P36542	ATP synthase subunit gamma;ATP synthase subunit gamma, mitochondrial	ATP5C1	1214300000	4148900000	30.1775	31.9501
O15145;B4DM63;C9JZD1;F8VR50	Actin-related protein 2/3 complex subunit 3	ARPC3	1214900000	5389100000	30.1782	32.3274
Q96IR7	4-hydroxyphenylpyruvate dioxygenase-like protein	HPDL	1215500000	1478100000	30.1789	30.4611
F5H656;Q8WXF1;Q8WXF1-2	Paraspeckle component 1	PSPC1	1218500000	3950600000	30.1825	31.8794
B4DJP7;P62318	Small nuclear ribonucleoprotein Sm D3	SNRPD3	1222400000	3620900000	30.1871	31.7537
Q99426;A8MVD5	Tubulin-folding cofactor B	TBCB	1222600000	1810300000	30.1873	30.7536
Q13247-3;Q13247;Q13247-2	Serine/arginine-rich splicing factor 6	SRSF6	1223100000	102950000	30.1879	26.6174
E9PIF2;Q13206;E7EUR6	Probable ATP-dependent RNA helicase DDX10	DDX10	1223900000	837320000	30.1888	29.6412
Q9H1E5;E9PIN7	Thioredoxin-related transmembrane protein 4	TMX4	1227700000	682970000	30.1933	29.3472
A1L0T0;E9PJS0;C9JNI8;E9PL44;E9PNL1	Acetolactate synthase-like protein	ILVBL	1233200000	1479400000	30.1998	30.4624
Q71UI9;P0C0S5;C9J0D1;A6NKY0;A6NN01;A6NFA8;C9J386	Histone H2A.V;Histone H2A.Z;Histone H2A	H2AFV;H2AFZ	1235800000	924970000	30.2028	29.7848
Q5QPL9;Q9UKM9-2;Q9UKM9;Q5QPM1;Q5QPM0;E9PDF3;Q5QPM2	RNA-binding protein Raly	RALY	1236200000	1223800000	30.2033	30.1887
F8W914;Q9NQC3-2;Q9NQC3-5;Q9NQC3;F8WAM4;Q9NQC3-3;Q9NQC3-4;Q9NQC3-6	Reticulon;Reticulon-4	RTN4	1238200000	2508700000	30.2056	31.2243
P49458;E9PE20;P49458-2	Signal recognition particle 9 kDa protein	SRP9	1239000000	2601600000	30.2065	31.2768
P62861;E9PR30	40S ribosomal protein S30	FAU	1240300000	2382900000	30.208	31.1501
P30046;B7Z522;B5MC82;A6NHG4	D-dopachrome decarboxylase;D-dopachrome decarboxylase-like protein	DDT;DDTL	1244300000	1050100000	30.2127	29.9679
Q7Z2Z2;Q7Z2Z2-2;H0YK75	Elongation factor Tu GTP-binding domain-containing protein 1	EFTUD1	1244500000	735440000	30.2129	29.454
P09661;H0YKK0;H0YMA0;H0YLR3;Q9UEN1;O95485	U2 small nuclear ribonucleoprotein A	SNRPA1	1244500000	4656900000	30.2129	32.1167
G8JLB6;P31943;E9PCY7;H0YB39;D6RBM0;E5RGV0;H0YBD7;D6RIT2;E7EN40;D6RIU0;D6RAM1;D6R9T0;D6RFM3;D6RDU3;D6RJ04;D6RIH9;E7EQJ0;E5RGH4;H0YBG7;D6R9D3;D6RF17;D6RDL0;H0YAQ2;F5GZT4;E5RJ94	Heterogeneous nuclear ribonucleoprotein H;Heterogeneous nuclear ribonucleoprotein H, N-terminally processed	HNRNPH1	1245100000	5977100000	30.2136	32.4768
O95816;B4DXE2;A2A296	BAG family molecular chaperone regulator 2	BAG2	1245300000	0	30.2138	#NUM!
Q15274;C9JCJ5;F8W702	Nicotinate-nucleotide pyrophosphorylase [carboxylating]	QPRT	1248500000	562560000	30.2175	29.0674
P62873;B1AKQ9;B1AKQ8;B1AKQ7;H0Y418;F5H100;F5H8J8;F5H0S8;E9PCP0;P16520	Guanine nucleotide-binding protein G(I)/G(S)/G(T) subunit beta-1	GNB1	1250100000	317420000	30.2194	28.2418
F5H4V4;P46013;P46013-2;E7EN66;Q70L72	Antigen KI-67	MKI67	1251800000	5643800000	30.2214	32.394
Q9H0S4;G5E955;F5H1N9	Probable ATP-dependent RNA helicase DDX47	DDX47	1252100000	1650800000	30.2217	30.6205
Q13630;E9PKL9;E9PP14;E9PLH9;E9PP60;H0YE90;H0YCP7	GDP-L-fucose synthase	TSTA3	1260700000	1088200000	30.2316	30.0193
O14925;E9PB91;B1APJ0;Q5SRD1;H0Y6X5;E7EP42;C9JV18;C9JSY4	Mitochondrial import inner membrane translocase subunit Tim23;Putative mitochondrial import inner membrane translocase subunit Tim23B	TIMM23;TIMM23B	1263100000	1656800000	30.2343	30.6258
Q13242;H0YIB4	Serine/arginine-rich splicing factor 9	SRSF9	1265200000	2385800000	30.2367	31.1518
Q9Y2R4;A8MTP9;F5H5G9;F5H0R7	Probable ATP-dependent RNA helicase DDX52	DDX52	1266700000	1000800000	30.2384	29.8985
P52948-5;P52948;P52948-6;P52948-2;P52948-4;P52948-3;H0YDF4;H0YEN4;H0YCT1;H0YCR0;H0YDA1	Nuclear pore complex protein Nup98-Nup96;Nuclear pore complex protein Nup98;Nuclear pore complex protein Nup96	NUP98	1269400000	1104700000	30.2415	30.041
O75746;B3KR64;F8W9J0;H0YFB2;B4DGK6	Calcium-binding mitochondrial carrier protein Aralar1	SLC25A12	1274100000	933610000	30.2468	29.7982
Q9BUB7;Q9BUB7-2;D4PHA6;E9PDY9	Transmembrane protein 70, mitochondrial	TMEM70	1280900000	329640000	30.2545	28.2963
Q8N1G4	Leucine-rich repeat-containing protein 47	LRRC47	1282300000	3878700000	30.2561	31.8529
P14550;Q5T621	Alcohol dehydrogenase [NADP(+)]	AKR1A1	1285100000	2952700000	30.2592	31.4594
P37198	Nuclear pore glycoprotein p62	NUP62	1288100000	1035600000	30.2626	29.9478
Q92947;Q92947-2;B4DK85;B4DQF2	Glutaryl-CoA dehydrogenase, mitochondrial	GCDH	1291400000	1489900000	30.2663	30.4726
Q96PK6;Q96PK6-2;F8WDX3;F2Z2W2;B8ZZ74;D6RGD8;Q2PYN1	RNA-binding protein 14	RBM14	1292000000	895000000	30.267	29.7373
P27986;P27986-4;E7EX19;P27986-3;P27986-2;E5RGI8;H0YB27;E5RJY0;H0YBC2;E5RHI0;F6TDL0;Q92569	Phosphatidylinositol 3-kinase regulatory subunit alpha	PIK3R1	1295400000	570480000	30.2708	29.0876
Q9NQR4;F8WF70	Omega-amidase NIT2	NIT2	1300200000	2894400000	30.2761	31.4306
P63173	60S ribosomal protein L38	RPL38	1302300000	2751900000	30.2784	31.3578
Q7Z4Q2;B7WNW7;Q7Z4Q2-2;Q7Z4Q2-3	HEAT repeat-containing protein 3	HEATR3	1302400000	1358600000	30.2785	30.3395
Q9H2J4;C9JST4	Phosducin-like protein 3	PDCL3	1308000000	2136300000	30.2847	30.9925
O00541-2;O00541;B5MCF9;B3KXD6;C9JXJ1	Pescadillo homolog	PES1	1309700000	3546400000	30.2866	31.7237
P52565;A8MXW0	Rho GDP-dissociation inhibitor 1	ARHGDIA	1310300000	2164900000	30.2873	31.0117
H0YJ40;G3V4X6;G3V2S9;Q9GZT3;H0YJW7;H0YJ07;H0YJU7;H0YJI1	SRA stem-loop-interacting RNA-binding protein, mitochondrial	SLIRP	1315600000	1110800000	30.2931	30.049
P62993;P62993-2	Growth factor receptor-bound protein 2	GRB2	1318300000	2190200000	30.296	31.0284
Q96GQ7;Q3MI07	Probable ATP-dependent RNA helicase DDX27	DDX27	1319700000	2947800000	30.2976	31.457
Q9NZL4;C9JNI7;Q9NZL4-2	Hsp70-binding protein 1	HSPBP1	1319900000	3715500000	30.2978	31.7909
E9PAT9;P18754;P18754-2;C9JW69;C9JRH2;C9JMJ4;C9J3R0;C9JQZ4	Regulator of chromosome condensation	RCC1	1320900000	3987000000	30.2989	31.8927
P18077;C9K025;F8WBS5;F8WB72	60S ribosomal protein L35a	RPL35A	1324400000	750430000	30.3027	29.4831
Q9UNS2;B4DY81;C9JLV5	COP9 signalosome complex subunit 3	COPS3	1324500000	3321900000	30.3028	31.6294
P49756;P49756-2;P49756-3;E9PQU5;H0YE46;E9PSE8	RNA-binding protein 25	RBM25	1327800000	3012400000	30.3064	31.4883
P10606	Cytochrome c oxidase subunit 5B, mitochondrial	COX5B	1331500000	969160000	30.3104	29.8522
P51571;A6NLM8	Translocon-associated protein subunit delta	SSR4	1332600000	4406100000	30.3116	32.0369
P09972;B7Z1N6;B7Z3K7;A8MVZ9;C9J8F3;Q5T7D5;C9J4K3;P05062	Fructose-bisphosphate aldolase C	ALDOC	1333400000	3428900000	30.3125	31.6751
P61088;F8VQQ8;F8VSD4;F8VV71;F8VZ29	Ubiquitin-conjugating enzyme E2 N	UBE2N	1337900000	4210300000	30.3173	31.9713
Q92673;E9PKB0;E9PS32;E9PP43;E9PPB3	Sortilin-related receptor	SORL1	1338300000	393050000	30.3178	28.5501
Q8TCJ2	Dolichyl-diphosphooligosaccharide--protein glycosyltransferase subunit STT3B	STT3B	1338800000	3565200000	30.3183	31.7313
Q14008-2;Q14008;Q14008-3;E7ER31;H0YEK7;E9PQH5;H0YDX5;H0YCF6	Cytoskeleton-associated protein 5	CKAP5	1339900000	5059000000	30.3195	32.2362
P61289;P61289-2;B3KQ25;B7Z8D3	Proteasome activator complex subunit 3	PSME3	1340900000	2370200000	30.3206	31.1424
P33176;Q12840;H0YIN5	Kinesin-1 heavy chain	KIF5B	1350800000	1120500000	30.3312	30.0615
Q92878;Q92878-2;Q92878-3;E7EN38;E7ESD9;C9JNH8;E9PM98	DNA repair protein RAD50	RAD50	1356000000	419880000	30.3367	28.6454
P50502;Q8IZP2;F6VDH7;Q3KNR6;Q8NFI4	Hsc70-interacting protein;Putative protein FAM10A4;Putative protein FAM10A5	ST13;ST13P4;ST13P5	1358600000	3840900000	30.3395	31.8388
O43615	Mitochondrial import inner membrane translocase subunit TIM44	TIMM44	1362900000	4766100000	30.344	32.1502
Q9H4A4;A6NKB8;C9JMZ3	Aminopeptidase B	RNPEP	1363600000	4379200000	30.3448	32.028
P20042	Eukaryotic translation initiation factor 2 subunit 2	EIF2S2	1365600000	1392800000	30.3469	30.3753
P39748;F5H1Y3	Flap endonuclease 1	FEN1	1367500000	5794500000	30.3489	32.432
Q9HD33-2;Q9HD33;Q9HD33-3	39S ribosomal protein L47, mitochondrial	MRPL47	1372700000	622250000	30.3544	29.2129
Q15435-2;Q15435;C9J177;C9JD73;B5MCY6;Q15435-4;Q15435-3;B5MBZ8;C9JRC4	Protein phosphatase 1 regulatory subunit 7	PPP1R7	1374300000	2209200000	30.356	31.0409
P42858	Huntingtin	HTT	1379300000	1090400000	30.3613	30.0222
Q96ST3	Paired amphipathic helix protein Sin3a	SIN3A	1381400000	5199400000	30.3635	32.2757
F5H4U5;P04899;B4E2X5;B4DYA0;P04899-2;B3KTZ0;F5GZL8;P63096;B4E2V1;P09471-2;P11488;P09471;P19087;A8MTJ3;C9JPP4	Guanine nucleotide-binding protein G(i) subunit alpha-2	GNAI2	1382300000	4743700000	30.3644	32.1434
Q5JPE7-2;P69849;Q5JPE7;F5H826;Q4G177;Q15155;F5GX42	Nodal modulator 2;Nodal modulator 3;Nodal modulator 1	NOMO2;NOMO3;NOMO1	1383300000	2710100000	30.3655	31.3357
Q9UIQ6-3;Q9UIQ6-2;Q9UIQ6	Leucyl-cystinyl aminopeptidase;Leucyl-cystinyl aminopeptidase, pregcy serum form	LNPEP	1393100000	1016400000	30.3757	29.9208
P02545;P02545-3;P02545-2;Q6UYC3;D6RAQ3;E7EUI9;Q3BDU5;Q5TCJ4;Q5TCI8;H0YAB0	Prelamin-A/C;Lamin-A/C	LMNA	1398100000	3487600000	30.3808	31.6996
P24158;F5H8B6	Myeloblastin	PRTN3	1400000000	5294800000	30.3828	32.3019
Q7Z4H8;Q7Z4H8-2;Q7Z4H8-3;H0YEM3	KDEL motif-containing protein 2	KDELC2	1400400000	999340000	30.3832	29.8964
P46977;E9PNQ1;E9PIJ8;E9PN73;E9PI32;H0YET6	Dolichyl-diphosphooligosaccharide--protein glycosyltransferase subunit STT3A	STT3A	1410900000	2986700000	30.394	31.4759
Q9Y3Z3;Q9Y3Z3-2;A6NDZ3	Deoxynucleoside triphosphate triphosphohydrolase SAMHD1	SAMHD1	1416100000	1840300000	30.3993	30.7773
Q7Z7H8;A6NGJ4	39S ribosomal protein L10, mitochondrial	MRPL10	1416300000	396740000	30.3995	28.5636
O00231	26S proteasome non-ATPase regulatory subunit 11	PSMD11	1417000000	6654200000	30.4002	32.6316
Q9Y3E5	Peptidyl-tRNA hydrolase 2, mitochondrial	PTRH2	1422200000	609710000	30.4055	29.1835
Q99436;Q5TBG5;B4E0P1	Proteasome subunit beta type-7	PSMB7	1423800000	1840300000	30.4071	30.7773
Q8TEQ6	Gem-associated protein 5	GEMIN5	1425200000	3699900000	30.4085	31.7848
Q9BYD3;Q9BYD3-2	39S ribosomal protein L4, mitochondrial	MRPL4	1425800000	2370600000	30.4091	31.1426
B7Z4B8;Q9BUJ2-4;Q9BUJ2-2;Q9BUJ2;Q9BUJ2-3;Q9BUJ2-5	Heterogeneous nuclear ribonucleoprotein U-like protein 1	HNRNPUL1	1433500000	3746300000	30.4169	31.8028
Q9BT78;D6RAX7;D6RFN0;B3KST5;D6RD63	COP9 signalosome complex subunit 4	COPS4	1434200000	1451400000	30.4176	30.4348
O95456;O95456-2;F8WBH7	Proteasome assembly chaperone 1	PSMG1	1438800000	2559700000	30.4222	31.2533
Q02750;Q02750-2	Dual specificity mitogen-activated protein kinase kinase 1	MAP2K1	1442200000	0	30.4256	#NUM!
Q9NUQ8;Q9NUQ8-2;F8WCU6	ATP-binding cassette sub-family F member 3	ABCF3	1442800000	609850000	30.4262	29.1839
Q13435;E9PPJ0;E9PJT3;E9PJ04;H0YCG1;H0YEX5;H0YDT7;E9PIL8	Splicing factor 3B subunit 2	SF3B2	1445900000	5622600000	30.4293	32.3886
Q9UNX4;Q6PDA5	WD repeat-containing protein 3	WDR3	1450300000	4441000000	30.4337	32.0482
O75153;C9J6D7;Q9Y5I4-2;Q9Y5I4	Clustered mitochondria protein homolog	CLUH	1453400000	4518700000	30.4368	32.0733
Q07021	Complement component 1 Q subcomponent-binding protein, mitochondrial	C1QBP	1454400000	2712900000	30.4378	31.3372
P11216;H0Y4Z6	Glycogen phosphorylase, brain form	PYGB	1455200000	3008300000	30.4386	31.4863
P15170-2;P15170;Q8IYD1;F5GWG9	Eukaryotic peptide chain release factor GTP-binding subunit ERF3A;Eukaryotic peptide chain release factor GTP-binding subunit ERF3B	GSPT1;GSPT2	1468900000	5386400000	30.4521	32.3267
Q7L014;D6RJA6;H0Y9U3	Probable ATP-dependent RNA helicase DDX46	DDX46	1469400000	3546100000	30.4526	31.7236
Q9H269;Q9H269-2;Q5JUA8;Q5JUA9;Q5JUB0	Vacuolar protein sorting-associated protein 16 homolog	VPS16	1470300000	704700000	30.4535	29.3924
Q5BJF2;Q86XC5	Transmembrane protein 97	TMEM97	1470400000	655270000	30.4536	29.2875
P07099;B1AQP9;B1AQP8	Epoxide hydrolase 1	EPHX1	1477700000	0	30.4607	#NUM!
P52888;B3KSE2	Thimet oligopeptidase	THOP1	1482200000	332900000	30.4651	28.3105
Q9Y276;C9J8G3;C9JKM6;C9JAS4;C9J1S9;C9J4Q9	Mitochondrial chaperone BCS1	BCS1L	1482200000	1167000000	30.4651	30.1202
O95881	Thioredoxin domain-containing protein 12	TXNDC12	1483500000	2301100000	30.4664	31.0997
P18583-2;P18583-5;P18583-7;P18583;P18583-9;P18583-10;P18583-4;P18583-3;P18583-6;P18583-8	Protein SON	SON	1487700000	1821200000	30.4704	30.7622
Q9NY61	Protein AATF	AATF	1488500000	903190000	30.4712	29.7505
Q13011	Delta(3,5)-Delta(2,4)-dienoyl-CoA isomerase, mitochondrial	ECH1	1489700000	4522400000	30.4724	32.0744
Q9NSE4;F6SBX2	Isoleucine--tRNA ligase, mitochondrial	IARS2	1490100000	1825900000	30.4728	30.766
P52907	F-actin-capping protein subunit alpha-1	CAPZA1	1496600000	3483000000	30.479	31.6977
Q5VYK3;B3KXF2;Q5VYK5	Proteasome-associated protein ECM29 homolog	ECM29	1500900000	3205800000	30.4832	31.578
Q9UBB9;E7EMD1;E9PHU6;Q9UBB9-2;F6SQZ1;F6XM96;F6UKU9;F6UQ07;H0Y4U8;E9PBM7	Tuftelin-interacting protein 11	TFIP11	1501900000	651200000	30.4841	29.2785
F8W7K3;Q13813-3;Q13813;A6NG51;Q13813-2;B4DGT1;A6NN88	Spectrin alpha chain, non-erythrocytic 1	SPTAN1	1504500000	6112200000	30.4866	32.509
O00487	26S proteasome non-ATPase regulatory subunit 14	PSMD14	1506700000	2069800000	30.4887	30.9468
O76094;G5E9Z8;H0YH39;D6RDY6	Signal recognition particle subunit SRP72	SRP72	1507200000	4109200000	30.4892	31.9362
Q96C86	m7GpppX diphosphatase	DCPS	1508200000	2579800000	30.4902	31.2646
F8VZJ2;H0YHX9;Q13765;F8VU71;E9PAV3;F8W0W4;F8W1N5;F8VNW4;F8VZ58;Q9BZK3	Nascent polypeptide-associated complex subunit alpha;Nascent polypeptide-associated complex subunit alpha, muscle-specific form	NACA	1511800000	2959700000	30.4936	31.4628
D6RBW1;P06730;B7Z6V1;P06730-2;H0Y8J7;D6RHE2;H0Y8X3;A6NMX2	Eukaryotic translation initiation factor 4E	EIF4E	1512600000	0	30.4944	#NUM!
H0YN26;F2Z3H3;P39687;O95626;O43423	Acidic leucine-rich nuclear phosphoprotein 32 family member A	ANP32A	1512800000	1031500000	30.4946	29.9421
Q9UQ13;Q9UQ13-2	Leucine-rich repeat protein SHOC-2	SHOC2	1515300000	794050000	30.497	29.5647
P34932;Q9BUK9	Heat shock 70 kDa protein 4	HSPA4	1517000000	1706900000	30.4986	30.6687
F8WJN3;C9JGC2;Q16630-3;Q16630;Q16630-2;F8W084	Cleavage and polyadenylation specificity factor subunit 6	CPSF6	1529300000	1777400000	30.5102	30.7271
Q8TDN6	Ribosome biogenesis protein BRX1 homolog	BRIX1	1529900000	3071100000	30.5108	31.5161
P48444;B0YIW6;E9PEU4;Q6P1Q5;E9PK34	Coatomer subunit delta	ARCN1	1543200000	6957400000	30.5233	32.6959
P54920	Alpha-soluble NSF attachment protein	NAPA	1546500000	3322100000	30.5264	31.6294
Q8N163-2;Q8N163;G3V119;H0YB24;E5RFJ3;H0YC69;E5RGU7;E5RHJ4;H0YC58;E5RHH8	Cell cycle and apoptosis regulator protein 2	CCAR2	1554900000	5782900000	30.5342	32.4291
O43776;B4DN60;B4DG16;F5H015	Asparagine--tRNA ligase, cytoplasmic	NARS	1555800000	8575800000	30.535	32.9976
E9PCI3;P08243;E9PCX6;F8WEJ5;C9J057;C9JT45;C9JM09;C9JLN6	Asparagine synthetase [glutamine-hydrolyzing]	ASNS	1557900000	4452400000	30.537	32.0519
P62314	Small nuclear ribonucleoprotein Sm D1	SNRPD1	1558200000	3784000000	30.5372	31.8173
Q2TAY7;B4E3L0	WD40 repeat-containing protein SMU1;WD40 repeat-containing protein SMU1, N-terminally processed	SMU1	1558300000	4091100000	30.5373	31.9298
O75629	Protein CREG1	CREG1	1561000000	376810000	30.5398	28.4893
Q9Y673-2;Q9Y673;B4DR67	Dolichyl-phosphate beta-glucosyltransferase	ALG5	1564800000	406360000	30.5433	28.5982
Q14683;G8JLG1;H0Y7K8;E7EPI6	Structural maintece of chromosomes protein 1A	SMC1A	1567600000	7464000000	30.5459	32.7973
Q9BVP2-2;Q9BVP2;C9JZT7;B4DMU5;C9JYH9	Guanine nucleotide-binding protein-like 3	GNL3	1575700000	1568900000	30.5533	30.5471
G5E9Y2;Q5T6H7;Q9NQW7;G8JLB2;Q9NQW7-2;Q5T6H2;Q5T6H3	Xaa-Pro aminopeptidase 1	XPNPEP1	1579600000	4544700000	30.5569	32.0815
B7WP74;B7WP27;Q9HCG8	Pre-mRNA-splicing factor CWC22 homolog	CWC22	1580700000	929440000	30.5579	29.7918
Q9BXP5-4;Q9BXP5-2;Q9BXP5-3;Q9BXP5;Q9BXP5-5;E7EPT2;F5H3Y8	Serrate RNA effector molecule homolog	SRRT	1581900000	2308300000	30.559	31.1042
B2R5P6;E2QRB9;B7Z2S5;E9PNQ6;E7EW10;Q16881-5;Q16881-2;Q16881-4;Q16881-3;Q16881-6;Q16881;E9PIR7;E7ESI6;F5H780;E9PMY9;E9PKD3;E9PIZ5;E9PLT3;E9PKI4;E9PRI8;E9PQI3	Thioredoxin reductase 1, cytoplasmic	GML;TXNRD1	1581900000	3367100000	30.559	31.6489
C9J3L8;C9J5W0;E9PAL7;C9IZQ1;P43307;F5H5Y2;P43307-2;C9JY01;C9JBX5	Translocon-associated protein subunit alpha	SSR1	1585500000	1871900000	30.5623	30.8019
O95747;C9JIG9	Serine/threonine-protein kinase OSR1	OXSR1	1587200000	3166900000	30.5638	31.5604
O60884	DnaJ homolog subfamily A member 2	DNAJA2	1591300000	4142800000	30.5676	31.948
O43390;E7ERE4;O43390-2;Q2L7G6;E7ETM7	Heterogeneous nuclear ribonucleoprotein R	HNRNPR	1594800000	3068200000	30.5707	31.5147
P16278-3;P16278;P16278-2;E7EQ29;C9JF15;C9J539;C9J4G9;F8WF40;C9JWX1;Q6UWU2-2;Q6UWU2	Beta-galactosidase	GLB1	1597700000	1242800000	30.5733	30.2109
A2A274;Q99798;F5H2A5;B4DW08;B4DEC3	Aconitate hydratase, mitochondrial	ACO2	1598400000	4201600000	30.574	31.9683
Q5T5C7;P49591	Serine--tRNA ligase, cytoplasmic	SARS	1615800000	2920100000	30.5896	31.4434
Q9Y376;B7ZBJ4;Q5TAW7;E9PEW4;Q9H9S4	Calcium-binding protein 39	CAB39	1616500000	4381200000	30.5902	32.0287
Q9BW72	HIG1 domain family member 2A, mitochondrial	HIGD2A	1617700000	338940000	30.5913	28.3365
P60953;Q5JYX0;E7ETU3	Cell division control protein 42 homolog	CDC42	1618200000	0	30.5917	#NUM!
Q92979	Ribosomal RNA small subunit methyltransferase NEP1	EMG1	1619200000	2278000000	30.5926	31.0851
D6RG39;D6RIT9;Q9NX40-3;Q9NX40-2;G8JLN7;Q9NX40;D6RDI5;D6RI08;D6RA54;D6RC55;D6RDK1;D6RIV2;D6R9T5;D6RDK6;D6RBN5;D6R918;D6RBC5;D6RF07	OCIA domain-containing protein 1	OCIAD1	1620000000	2594900000	30.5933	31.273
Q9BYG3;E9PFS2;C9J6C5;C9J808	MKI67 FHA domain-interacting nucleolar phosphoprotein	NIFK	1621500000	3299900000	30.5947	31.6198
Q8IVD9;C9IYD9	NudC domain-containing protein 3	NUDCD3	1625600000	1348800000	30.5983	30.329
Q9NXK8;Q9NXK8-2	F-box/LRR-repeat protein 12	FBXL12	1627100000	1533200000	30.5997	30.5139
P46459;F5H2E1;B4DFA2	Vesicle-fusing ATPase	NSF	1637800000	2771600000	30.6091	31.3681
Q02790;F5H1U3;H0YFG2;F5H120	Peptidyl-prolyl cis-trans isomerase FKBP4;Peptidyl-prolyl cis-trans isomerase FKBP4, N-terminally processed	FKBP4	1638700000	5109000000	30.6099	32.2504
P57088;D6RAA6;H0Y8N0;D6RBY2	Transmembrane protein 33	TMEM33	1639500000	4608800000	30.6106	32.1017
Q9BZE4;B7Z7A3;B4DY13;Q5T3R7	Nucleolar GTP-binding protein 1	GTPBP4	1647400000	7009300000	30.6175	32.7066
Q15437;Q5QPE2;E9PBH1;Q5QPE1;G3V5K1;G3V299	Protein transport protein Sec23B	SEC23B	1648300000	2669400000	30.6183	31.3139
P23921;E9PD78;H0YFI0;E9PL69;F5H861;E9PP77;H0YCY7	Ribonucleoside-diphosphate reductase large subunit	RRM1	1649800000	4504500000	30.6196	32.0687
Q16181;E7ES33;E7EPK1;Q16181-2;H0Y3Y4;H0YFF6;B4DNE4;G3V1Q4;F5GZE5;F2Z3D3;Q5JXL7;Q5W161	Septin-7	2016-09-07	1654100000	1821300000	30.6234	30.7623
O00232;A6NP15	26S proteasome non-ATPase regulatory subunit 12	PSMD12	1655300000	2722600000	30.6244	31.3423
O94826;B4DZ87	Mitochondrial import receptor subunit TOM70	TOMM70A	1655700000	3441200000	30.6248	31.6803
F5H0L8;Q9Y6Y8-2;Q9Y6Y8;REV__E2QRA2;REV__H0Y502;REV__O15068-5;REV__O15068-3;REV__O15068-2;REV__O15068-6;REV__O15068-8;REV__O15068-9;REV__O15068;REV__G5E9A1	SEC23-interacting protein	SEC23IP	1666300000	1924100000	30.634	30.8415
Q9HA82;H0YKR4;H0YNR6;H0YN04;H0YKC9;H0YLY3;H0YMY6;H0YKS3	Ceramide synthase 4	CERS4	1667100000	955480000	30.6347	29.8317
P31942-2;P31942;P31942-3;B4DHY1;P31942-4;P31942-6;P31942-5	Heterogeneous nuclear ribonucleoprotein H3	HNRNPH3	1668800000	2479100000	30.6362	31.2072
Q9Y2Z0;Q9Y2Z0-2;F5H5A9	Suppressor of G2 allele of SKP1 homolog	SUGT1	1671900000	2986400000	30.6388	31.4758
Q96RP9;Q96RP9-2;C9IZ01;F8WAU4;Q9H9M0;C9JA25	Elongation factor G, mitochondrial	GFM1	1672200000	2963600000	30.6391	31.4647
Q9Y5M8;C9J5Z8	Signal recognition particle receptor subunit beta	SRPRB	1673700000	1194900000	30.6404	30.1542
F5GYN4;Q96FW1;F5H6Q1;F5GYJ8;F5H3F0;Q96FW1-2	Ubiquitin thioesterase OTUB1	OTUB1	1674100000	2679700000	30.6407	31.3194
P19623	Spermidine synthase	SRM	1683000000	6549500000	30.6484	32.6087
P43897;P43897-2;C9JT21;F8W6R3;C9JG32;F8VPA7;F8VS27;F5H2T7;B4E391;F8WCK2	Elongation factor Ts, mitochondrial;Elongation factor Ts	TSFM	1683300000	1390900000	30.6486	30.3734
C9JU56;B7Z4E3;B7Z4C8;Q6IRZ0;P62899;P62899-2;B8ZZK4	60S ribosomal protein L31	RPL31	1683600000	5690400000	30.6489	32.4059
Q9BW27;B4DMQ3;B4DPW1;F5H0B4;F5H0W7	Nuclear pore complex protein Nup85	NUP85	1692900000	1317600000	30.6568	30.2953
Q8IYB8;B1AR60	ATP-dependent RNA helicase SUPV3L1, mitochondrial	SUPV3L1	1706500000	2317200000	30.6684	31.1097
P61160;E9PF41;G3V1L8;F5H6T1	Actin-related protein 2	ACTR2	1709300000	5449500000	30.6708	32.3435
Q15392;B7Z817;F5H0H1;B7Z943	Delta(24)-sterol reductase	DHCR24	1718000000	2174400000	30.6781	31.018
B4DVY1;A8MWD3;O15371;B0QYA5;B0QYA3;B0QYA4;B0QYA6;B0QYA7;B0QYA8	Eukaryotic translation initiation factor 3 subunit D	EIF3D	1722600000	4326100000	30.6819	32.0104
O94973;O94973-2;C9J1S3;O94973-3;E7ESQ4;E9PJJ7;E7EVC3;E9PR62;E9PBJ2;E9PNC4;H0YEG0;H0YDE9;E9PPY8;E9PQP4	AP-2 complex subunit alpha-2	AP2A2	1723100000	651030000	30.6824	29.2781
P22061;P22061-2;B7Z972;F8WDT3;F8WAV5;F8WAX2;C9J0F2	Protein-L-isoaspartate(D-aspartate) O-methyltransferase;Protein-L-isoaspartate O-methyltransferase	PCMT1	1725300000	4047500000	30.6842	31.9144
Q9NS69	Mitochondrial import receptor subunit TOM22 homolog	TOMM22	1731000000	1573300000	30.689	30.5511
Q15942;H0Y2Y8;B4DQX7;B4DQR8;C9IZ41;C9JJK5	Zyxin	ZYX	1740100000	3641600000	30.6965	31.7619
Q9BXW9-2;Q9BXW9;Q9BXW9-3;Q9BXW9-4	Fanconi anemia group D2 protein	FANCD2	1742400000	1561400000	30.6984	30.5402
Q9BTT0;E9PPH5;Q5TB20;Q5TB19;E9PLC4;E9PEA6;E9PI45;Q5TB25	Acidic leucine-rich nuclear phosphoprotein 32 family member E	ANP32E	1742600000	1550500000	30.6986	30.5301
Q99460;Q99460-2;C9J9M4;F8WCE3	26S proteasome non-ATPase regulatory subunit 1	PSMD1	1746100000	3732100000	30.7015	31.7973
Q16563-2;C9JYN0;Q16563	Synaptophysin-like protein 1	SYPL1	1757400000	2086200000	30.7108	30.9582
P41240;E7EQW6	Tyrosine-protein kinase CSK	CSK	1757800000	1506800000	30.7111	30.4888
P16930;Q53XA7;H0YLK5;H0YN60;H0YLC7;B7Z4W2	Fumarylacetoacetase	FAH	1758800000	3790900000	30.7119	31.8199
O15143;F8WCG3;C9J4Z7;C9JEY1;C9JQM8;C9JFG9;C9J6C8;C9JBJ7;C9K057;C9JTT6;F8VXW2;C9JM51;F8WEB3	Actin-related protein 2/3 complex subunit 1B	ARPC1B	1762600000	4778800000	30.7151	32.154
Q05655;C9K0E3;C9J9P1;C9JZU8;B4DF52	Protein kinase C delta type;Protein kinase C delta type regulatory subunit;Protein kinase C delta type catalytic subunit	PRKCD	1768500000	3713900000	30.7199	31.7903
Q7Z7A4;Q7Z7A4-2;Q7Z7A4-4;Q7Z7A4-6;E9PD56;Q7Z7A4-7;Q7Z7A4-5;F5H0Z4;Q7Z7A4-3;F8WDF7;C9IYJ2;F8WAW8	PX domain-containing protein kinase-like protein	PXK	1771000000	2082500000	30.7219	30.9557
P42765	3-ketoacyl-CoA thiolase, mitochondrial	ACAA2	1771300000	3897000000	30.7222	31.8597
P55160;B4DUT5;F8W050;Q9Y2A7;Q9Y2A7-2	Nck-associated protein 1-like	NCKAP1L	1777400000	1122700000	30.7271	30.0643
P18085;C9JPM4;C9JAK5	ADP-ribosylation factor 4	ARF4	1787200000	3561700000	30.7351	31.7299
F5H6W1;E7ERK9;Q9UI10-3;Q9UI10;Q9UI10-2;F8W8L6	Translation initiation factor eIF-2B subunit delta	EIF2B4	1790200000	2239300000	30.7375	31.0604
E7ENP4;P14678-2;P14678;P14678-3;P63162;B3KVR1;E7ERB2;A8MT02	Small nuclear ribonucleoprotein-associated proteins B and B;Small nuclear ribonucleoprotein-associated protein N	SNRPB;SNRPN	1790300000	6074800000	30.7376	32.5002
E7EVL4;Q9H490-2;Q9H490	Phosphatidylinositol glycan anchor biosynthesis class U protein	PIGU	1795500000	404100000	30.7417	28.5901
P38159;P38159-2;B4E3U4;O75526	RNA-binding motif protein, X chromosome;RNA-binding motif protein, X chromosome, N-terminally processed	RBMX	1796600000	738560000	30.7426	29.4601
B7ZAM9;Q9UBQ5;B4DQ48	Eukaryotic translation initiation factor 3 subunit K	EIF3K	1801300000	2601900000	30.7464	31.2769
Q9Y2L1;Q9Y2L1-2;G3V1J5;F2Z2C0	Exosome complex exonuclease RRP44	DIS3	1802900000	5569200000	30.7477	32.3748
Q9UKD2	mRNA turnover protein 4 homolog	MRTO4	1803000000	932050000	30.7478	29.7958
Q14498-2;Q14498;A2RRD3;E1P5S2;G3XAC6;E9PCZ6;H0Y4X3;Q5QP23;Q5QP22;Q5QP21;F8WF24;F2Z3E6;F2Z2Z5;F8WF73;A8MYG5	RNA-binding protein 39	RBM39;RNPC2	1805000000	6975600000	30.7494	32.6997
P22695	Cytochrome b-c1 complex subunit 2, mitochondrial	UQCRC2	1808300000	7200300000	30.752	32.7454
D6RFM0;D6RAH7;Q96RP6;P62837;P61077;P61077-2;P61077-3;D6RAW0;D6RA11	Ubiquitin-conjugating enzyme E2 D2;Ubiquitin-conjugating enzyme E2 D3	UBE2D2;UBE2D3	1818500000	1192700000	30.7601	30.1516
Q99729-3;D6R9P3;D6RD18;D6RBZ0;Q99729-2;Q99729-4;Q99729	Heterogeneous nuclear ribonucleoprotein A/B	HNRNPAB	1820700000	5447200000	30.7618	32.3429
P50213;H0YL72;H0YMU3;P50213-2;B7Z9J8;H0YLI6;H0YKD0;H0YNF5;H0YM64;Q68D72;H0YLF8;H0YNF8;H0YL05;H0YM46	Isocitrate dehydrogenase [NAD] subunit alpha, mitochondrial	IDH3A	1821100000	3868500000	30.7622	31.8491
G3V5Z7;P60900;G3V295;B4DXJ9;G3V3I1;G3V3U4;B4DQR4;H0YJC4;G3V4S5;G3V2S7	Proteasome subunit alpha type;Proteasome subunit alpha type-6	PSMA6	1824600000	7337400000	30.7649	32.7726
O43156	TELO2-interacting protein 1 homolog	TTI1	1825700000	541280000	30.7658	29.0118
A4FU92;P56282;P56282-2	DNA polymerase epsilon subunit 2	POLE2	1828600000	420730000	30.7681	28.6483
Q5VTL8;Q5VTL8-2	Pre-mRNA-splicing factor 38B	PRPF38B	1829100000	647670000	30.7685	29.2707
P68036;E7EWS7;B4DDG1	Ubiquitin-conjugating enzyme E2 L3	UBE2L3	1830600000	2821000000	30.7697	31.3936
P30044-2;P30044;A6NG06;A6NC19	Peroxiredoxin-5, mitochondrial	PRDX5	1831600000	4405600000	30.7705	32.0367
Q9P000;B4DQW0;Q9P000-2;E9PJ95	COMM domain-containing protein 9	COMMD9	1834500000	541690000	30.7727	29.0129
P15153;B1AH77;B1AH80;B1AH78	Ras-related C3 botulinum toxin substrate 2	RAC2	1843000000	3273600000	30.7794	31.6082
Q9UH99;B0QY62;B0QY60;E9PGW0;H0Y686;B0QY64;B0QY63;E9PDF7	SUN domain-containing protein 2	SUN2	1843900000	681710000	30.7801	29.3446
P68402;E9PEJ5;A8DPS6;E9PLP3	Platelet-activating factor acetylhydrolase IB subunit beta	PAFAH1B2	1846900000	3639000000	30.7825	31.7609
P35998;B7Z5E2;C9JLS9	26S protease regulatory subunit 7	PSMC2	1854800000	7494900000	30.7886	32.8033
Q6FI81;Q6FI81-3;Q6FI81-2	Anamorsin	CIAPIN1	1857100000	1185500000	30.7904	30.1428
Q9H2U2;Q9H2U2-2;E2QRM6;Q9H2U2-3;F8WDN9;H0Y9D8;D6R967;Q9H2U2-4;D6RGV9;B4DFH3;D6RGI1;D6RAD3;H0Y8X2;F8W7R6;H0YAK2	Inorganic pyrophosphatase 2, mitochondrial	PPA2	1862200000	2353500000	30.7944	31.1322
Q7L1Q6;Q7L1Q6-2;C9IZ80;C9JFN4;H0Y503;C9J188;C9JWF5;C9JV57	Basic leucine zipper and W2 domain-containing protein 1	BZW1	1863700000	4968600000	30.7955	32.2102
A6NJA2;P54578;B7Z4N8	Ubiquitin carboxyl-terminal hydrolase;Ubiquitin carboxyl-terminal hydrolase 14	USP14	1871800000	4494300000	30.8018	32.0654
P63279;B0QYN7	SUMO-conjugating enzyme UBC9	UBE2I	1873800000	3011800000	30.8033	31.488
O95983-2;O95983	Methyl-CpG-binding domain protein 3	MBD3	1874200000	968230000	30.8036	29.8508
P00395	Cytochrome c oxidase subunit 1	MT-CO1	1882800000	463750000	30.8102	28.7888
P37268;E9PNM1;B7Z1J3;B4DJE5;B4DT56;B3KQ95;E9PJG4;E9PS69;E9PQ90;E9PNJ2;E9PSH1	Squalene synthase	FDFT1	1884900000	2154600000	30.8118	31.0048
O00425;O00425-2;F8WD15	Insulin-like growth factor 2 mRNA-binding protein 3	IGF2BP3	1889300000	3406900000	30.8152	31.6658
C9JIF9;P13798;C9JLK2;F8WEH5;H0YFE5	Acylamino-acid-releasing enzyme	APEH	1894300000	4286600000	30.819	31.9972
Q3ZCM7;F5H0I4;C9JAA5;Q5SQY0	Tubulin beta-8 chain	TUBB8	1894500000	2097300000	30.8192	30.9659
Q9NR45;Q5TBR1;E9PGK0;Q5TBR0	Sialic acid synthase	S	1896300000	1847500000	30.8205	30.7829
Q969X0;G8JLD1;Q5EBL4-3;Q5EBL4-2;Q5EBL4	RILP-like protein 2	RILPL2	1899200000	0	30.8227	#NUM!
Q92900-2;Q92900	Regulator of nonsense transcripts 1	UPF1	1903100000	7158300000	30.8257	32.737
P42766;H0Y3A0;F2Z388	60S ribosomal protein L35	RPL35	1903100000	11946000000	30.8257	33.4758
Q86Y56;Q86Y56-2;H0Y650;F5H8D4;E9PGY2;Q86Y56-3	HEAT repeat-containing protein 2	HEATR2	1906900000	5285800000	30.8286	32.2995
Q00341;E7EM71;H0Y394;E7EU12;C9JIZ1;C9J5E5;C9JZI8;C9JHZ8;C9JES8;C9JHS7;C9JT62;C9JK79;C9JMQ6;C9JQ82;C9JBS3;C9JEJ8;C9JKQ5;C9JHN6;C9JHS9;C9J739	Vigilin	HDLBP	1909000000	4763700000	30.8302	32.1494
P40763-2;P40763;G8JLH9	Signal transducer and activator of transcription 3;Signal transducer and activator of transcription	STAT3	1913700000	1588100000	30.8337	30.5647
Q8NFH4;F8VTY2;H0YHK8	Nucleoporin Nup37	NUP37	1915500000	812380000	30.8351	29.5976
Q13509;A8K854;G3V2A3;G3V5W4;G3V2R8;G3V3R4;G3V2N6;G3V542	Tubulin beta-3 chain	TUBB3	1916500000	1732200000	30.8358	30.69
P23368;Q9BWL6	NAD-dependent malic enzyme, mitochondrial	ME2	1921400000	1845800000	30.8395	30.7816
P17858;P17858-2;F5H3H2;E9PDI3;H0YIX6	ATP-dependent 6-phosphofructokinase, liver type	PFKL	1924300000	3947300000	30.8417	31.8782
O43818	U3 small nucleolar RNA-interacting protein 2	RRP9	1926000000	1259500000	30.843	30.2302
Q92759;A2ABL5;B4DTJ5	General transcription factor IIH subunit 4	GTF2H4	1949300000	429490000	30.8603	28.678
P05198;G3V4T5;H0YJS4;B4DM12	Eukaryotic translation initiation factor 2 subunit 1	EIF2S1	1949800000	1400100000	30.8607	30.3829
E9PAU8;P23141;P23141-2;B7Z795;Q9UKY3;Q9UKY3-2	Liver carboxylesterase 1	CES1	1951400000	4731700000	30.8619	32.1397
O95671;O95671-2;F5GXH4;E7ER97	N-acetylserotonin O-methyltransferase-like protein	ASMTL	1954100000	1659200000	30.8639	30.6278
Q16718;Q5H9R2;F8WAS3;C9IZN5	NADH dehydrogenase [ubiquinone] 1 alpha subcomplex subunit 5	NDUFA5	1962700000	433620000	30.8702	28.6919
P55010;H0YLZ1;H0YN40;H0YMJ8;H0YM54;H0YK11;H0YK29	Eukaryotic translation initiation factor 5	EIF5	1966100000	5315900000	30.8727	32.3077
Q12874;E7EUT8	Splicing factor 3A subunit 3	SF3A3	1970500000	4153400000	30.8759	31.9516
B5MD66;Q9Y320;Q9Y320-2;E9PSF0;E9PRL5;E9PLR1;G3V155	Thioredoxin-related transmembrane protein 2	TMX2	1974800000	1278500000	30.8791	30.2518
Q06124;Q06124-2;Q06124-3;H0YF12	Tyrosine-protein phosphatase non-receptor type 11	PTPN11	1975700000	1042300000	30.8797	29.9571
A8MZ22;Q99733;F5HFY4;C9JZI7;C9J6D1;A8MXH2;E9PNW0;E9PJJ2;E9PS34;E9PNJ7;E9PKT8;E9PP22;E9PKI2;H0YCI4;C9J1B1	Nucleosome assembly protein 1-like 4	NAP1L4	1976500000	4317600000	30.8803	32.0076
Q16543	Hsp90 co-chaperone Cdc37;Hsp90 co-chaperone Cdc37, N-terminally processed	CDC37	1980600000	4817300000	30.8833	32.1656
Q14980-2;Q14980;F5H2L0;H0YFY6;Q9BTE9;F5H4J1;F5H6Y5;H0YH75;F5H0Z7;F5H763;F5H2F3;F5H3L6;F8W6T3;F5H1L0;F5GZW1;F5GWK2;F5H073;F5H068;F5H7R5;F5H4Y4;F5GWA2	Nuclear mitotic apparatus protein 1	NUMA1	1981900000	3652900000	30.8842	31.7664
Q15418-2;E9PRI4;E9PGT3;Q15418;Q15418-3;E9PAN7;E9PMM7;Q5SVM7;E9PGT4	Ribosomal protein S6 kinase alpha-1;Ribosomal protein S6 kinase	RPS6KA1	1985000000	3494600000	30.8865	31.7025
Q9H488;B4DUV4;Q9H488-2	GDP-fucose protein O-fucosyltransferase 1	POFUT1	1991200000	4477500000	30.891	32.06
Q5UIP0;Q5UIP0-2;B4DS49;C9J1D6	Telomere-associated protein RIF1	RIF1	1994800000	3770300000	30.8936	31.812
P11766;H0YAG8;D6RFE4;D6RAY0;D6R9G2	Alcohol dehydrogenase class-3	ADH5	1996000000	2699200000	30.8945	31.3299
Q9BXJ9;F5H5A7;Q9BXJ9-4;Q6N069-5;Q6N069-4;Q6N069-3;Q6N069-2	N-alpha-acetyltransferase 15, NatA auxiliary subunit	NAA15	1999500000	5454600000	30.897	32.3448
Q15061;C9IZK7;C9JEE7	WD repeat-containing protein 43	WDR43	2011500000	1699500000	30.9056	30.6625
Q9NSD9;F5H6Y1	Phenylalanine--tRNA ligase beta subunit	FARSB	2012100000	8101100000	30.9061	32.9155
Q01082;Q01082-3;Q01082-2;F8W6C1;Q59FP5;P11277-3;P11277;P11277-2;E9PJZ2	Spectrin beta chain, non-erythrocytic 1	SPTBN1	2013600000	7245900000	30.9071	32.7545
B4DQ51;P45954	Short/branched chain specific acyl-CoA dehydrogenase, mitochondrial	ACADSB	2018600000	585530000	30.9107	29.1252
Q15149;Q15149-7;Q15149-8;Q15149-9;Q15149-5;Q15149-4;Q15149-6;Q15149-3;Q15149-2;E9PMV1;E9PKG0;H0YDN1;E9PIA2;E9PQ28	Plectin	PLEC	2020200000	6560400000	30.9119	32.6111
P37108;H0YLA2;H0YLW0	Signal recognition particle 14 kDa protein	SRP14	2020900000	536760000	30.9124	28.9997
Q53GQ0;E9PI21;Q96EA9	Estradiol 17-beta-dehydrogenase 12	HSD17B12	2035300000	3074200000	30.9226	31.5176
Q9HB71;Q5R370;B3KSF1;B2ZWH1;Q9HB71-2	Calcyclin-binding protein	CACYBP	2040900000	5336000000	30.9266	32.3131
Q9UBQ0;F8VXU5;Q9UBQ0-2;Q05DG7	Vacuolar protein sorting-associated protein 29	VPS29	2045800000	4625400000	30.93	32.1069
P40692;H0Y818;E9PCU2;H0Y3I0;B4DI13;F5H745;E9PEB4;B7Z821;F5H6L5;H0Y806;E9PE33;F2Z298;E9PF25;H0Y5L7;H0Y4N0;H0Y793;E7EUC9	DNA mismatch repair protein Mlh1	MLH1	2052400000	631620000	30.9347	29.2345
E9PH09;Q8NF50-3;Q8NF50-2;Q8NF50;F8W9H3;A2A369;E9PDJ4;A2A370;C9JE73;C9J7A3;F8W9H6;H0Y7L2;Q96N67-4;Q96N67-3;Q96N67-5;Q96N67-2;Q96N67-6;Q96N67;C9J613	Dedicator of cytokinesis protein 8	DOCK8	2058400000	5753300000	30.9389	32.4217
Q15459;E9PAW1;F5H048;F8WB66;F8WC79	Splicing factor 3A subunit 1	SF3A1	2064200000	6958900000	30.9429	32.6962
O15160-2;O15160;H0Y723;E9PBA4;E7EQB9;D6RDJ3;E9PDD3	DNA-directed RNA polymerases I and III subunit RPAC1	POLR1C	2069300000	3679300000	30.9465	31.7768
A8MUB1;P68366;C9JEV8;C9JQ00;C9JJQ8;C9JDS9;C9JDL2;C9K0S6;Q9H853	Tubulin alpha-4A chain	TUBA4A	2077400000	2445300000	30.9521	31.1874
O95336	6-phosphogluconolactonase	PGLS	2082300000	2828800000	30.9555	31.3975
B4E0K9;O00754;G5E928	Lysosomal alpha-mannosidase;Lysosomal alpha-mannosidase A peptide;Lysosomal alpha-mannosidase B peptide;Lysosomal alpha-mannosidase C peptide;Lysosomal alpha-mannosidase D peptide;Lysosomal alpha-mannosidase E peptide	MAN2B1	2083300000	3571900000	30.9562	31.734
D3DQV9;P78344;H0Y3P2;P78344-2;H0YCH5;E9PKF8;E9PCV8;H0YD77;H0YEC5;H0YE22;H0YDP4;H0YCF8;H0YD99;H0YEN8;H0YDC0;H0YE44	Eukaryotic translation initiation factor 4 gamma 2	EIF4G2	2085200000	5676100000	30.9575	32.4023
Q9HAV7;B4DWV5	GrpE protein homolog 1, mitochondrial;GrpE protein homolog	GRPEL1	2113000000	3171100000	30.9766	31.5623
P31930	Cytochrome b-c1 complex subunit 1, mitochondrial	UQCRC1	2125400000	2752000000	30.9851	31.3578
P06703	Protein S100-A6	S100A6	2126200000	22104000	30.9856	24.3978
P11177-2;P11177;B4DDD7;C9J634;F8WF02	Pyruvate dehydrogenase E1 component subunit beta, mitochondrial	PDHB	2127700000	4721300000	30.9866	32.1365
C9JGP9;E7ESZ7;O95299;Q8WXC9;C9J6X0;Q8N1B9	NADH dehydrogenase [ubiquinone] 1 alpha subcomplex subunit 10, mitochondrial	NDUFA10	2136900000	1666700000	30.9929	30.6343
E5RI99;P62888;E5RJH3	60S ribosomal protein L30	RPL30	2140700000	6864300000	30.9954	32.6765
Q9UJX5;E9PCR4;Q9UJX5-2;D6RAP6;D6RFM7	Anaphase-promoting complex subunit 4	ANAPC4	2140800000	605380000	30.9955	29.1733
Q86TB9;Q86TB9-4;Q86TB9-2;Q86TB9-3	Protein PAT1 homolog 1	PATL1	2141000000	0	30.9956	#NUM!
P46087;Q3KQS4;P46087-2;Q05BA7;F5GYR3;F5H5X6;F5GWB7;F5H709;F5H359;F5H8G6	Probable 28S rRNA (cytosine(4447)-C(5))-methyltransferase	NOP2	2142200000	2470300000	30.9964	31.202
Q9BS26	Endoplasmic reticulum resident protein 44	ERP44	2147100000	3057400000	30.9997	31.5097
F5H8J3;O96005;O96005-2;B4DDS3	Cleft lip and palate transmembrane protein 1	CLPTM1	2148700000	631090000	31.0008	29.2333
Q15717;B1AM48;B1APY9;B1APY8;Q12926-2;Q12926;P26378-4;P26378-2;B7Z4G7;P26378;P26378-3	ELAV-like protein 1	ELAVL1	2149500000	9336700000	31.0014	33.1203
Q9P0L0;Q9P0L0-2	Vesicle-associated membrane protein-associated protein A	VAPA	2150600000	5180200000	31.0021	32.2704
Q8N543;Q8N543-2;F5GZ85	Prolyl 3-hydroxylase OGFOD1	OGFOD1	2151800000	726770000	31.0029	29.4369
Q12788	Transducin beta-like protein 3	TBL3	2154300000	4728500000	31.0046	32.1387
Q9H8M2;Q9H8M2-3;Q9H8M2-1;B4DMQ2;B4DXI2;C9JBY0;Q9H8M2-2;Q9H8M2-4;H0YBR9;H0YAW8;H0YBF1	Bromodomain-containing protein 9	BRD9	2163400000	1387200000	31.0107	30.3695
F8W1A4;P54819-2;P54819;P54819-5;E7EWH4;P54819-6;P54819-3;F8VZG5;F8VY04;P54819-4;G3V213;F8VPP1	Adenylate kinase 2, mitochondrial;Adenylate kinase 2, mitochondrial;Adenylate kinase 2, mitochondrial, N-terminally processed	AK2	2165200000	6299600000	31.0119	32.5526
Q07020;G3V203;H0YHA7;F8VWC5;F8VYV2;E7EW92;F8VUA6;F8VXR6	60S ribosomal protein L18	RPL18	2167400000	1050600000	31.0133	29.9686
Q9H9Y6;F5GZX4;Q9H9Y6-2;F8W898;F5H643;F5GWZ8;C9JJG2;C9JS83;F8WDS4;F8WAK7;F8WBB9;F8WCS3	DNA-directed RNA polymerase I subunit RPA2;DNA-directed RNA polymerase	POLR1B	2169300000	1904700000	31.0146	30.8269
Q9UN86-2;Q9UN86;D6RFJ8;D6RAC7;D6RB17;D6RGJ4;D6RE13;D6RBW8;D6RBM9;D6REX8;D6RBR0;D6R9X5;D6R9A4	Ras GTPase-activating protein-binding protein 2	G3BP2	2171100000	2095700000	31.0158	30.9648
P63151;B4E1T7;E5RIY1;E5RFR9;G3V149;Q00005;Q00005-2;Q00005-3;Q66LE6;Q00005-4;Q00005-5;E5RHQ2;E5RJV2;F5GXJ6;A8MZB4;Q9Y2T4-3;B7Z3Y1;Q9Y2T4-2	Serine/threonine-protein phosphatase 2A 55 kDa regulatory subunit B alpha isoform	PPP2R2A	2179000000	1293900000	31.021	30.2691
P61758;F5H2A7	Prefoldin subunit 3	VBP1	2187500000	871270000	31.0266	29.6985
H0YG33;P08107;F8VZJ4;F5H1D3;F5GZ62;E7EQL7;E7EP94;Q5SP16;E7EP11;C9IYI3	Heat shock 70 kDa protein 1A/1B	HSPA1A	2190800000	2883100000	31.0288	31.425
E7EUE1;P28288;F5GYC1;P28288-2;P28288-3	ATP-binding cassette sub-family D member 3	ABCD3	2194200000	1135700000	31.031	30.0809
Q14978-2;Q14978	Nucleolar and coiled-body phosphoprotein 1	NOLC1	2199000000	493620000	31.0342	28.8788
P62750;A8MXA8;A8MUS3	60S ribosomal protein L23a	RPL23A	2202200000	1145100000	31.0363	30.0928
Q13151	Heterogeneous nuclear ribonucleoprotein A0	HNRNPA0	2204500000	4020700000	31.0378	31.9048
O15067;F5GWT9;H0YGH1	Phosphoribosylformylglycinamidine synthase	PFAS	2211400000	5113100000	31.0423	32.2516
Q9Y3E0;G3V1U5;F5H6U7;F5GWD8;F5GXH6	Vesicle transport protein GOT1B	GOLT1B	2222800000	976610000	31.0497	29.8632
Q07955;Q07955-3;Q07955-2	Serine/arginine-rich splicing factor 1	SRSF1	2229200000	2472700000	31.0539	31.2034
B4E241;P84103	Serine/arginine-rich splicing factor 3	SRSF3	2241200000	5864800000	31.0616	32.4494
Q92945;Q92945-2;E7EP96	Far upstream element-binding protein 2	KHSRP	2245300000	4635600000	31.0643	32.1101
B1AH87;P30536	Translocator protein	TSPO	2245600000	662540000	31.0645	29.3034
C9J4M6;C9J2Y9;P30876	DNA-directed RNA polymerase;DNA-directed RNA polymerase II subunit RPB2	POLR2B	2248900000	2690900000	31.0666	31.3254
Q10570;E9PIM1	Cleavage and polyadenylation specificity factor subunit 1	CPSF1	2250500000	2606700000	31.0676	31.2796
B9ZVN9;O95602	DNA-directed RNA polymerase;DNA-directed RNA polymerase I subunit RPA1	POLR1A	2255000000	2616100000	31.0705	31.2848
F5GYJ5;Q9NX18;F8W679;F5GXW4;F5H5T6	Succinate dehydrogenase assembly factor 2, mitochondrial	SDHAF2	2261700000	541960000	31.0748	29.0136
P50454;B4DN87;E9PPV6;E9PR70;E9PKH2;E9PK86;E9PMI5;E9PNX1;E9PQ34;E9PJH8;E9PIG2;E9PRS3;H0YEP8;E9PLA6	Serpin H1	SERPINH1	2267400000	4482000000	31.0784	32.0615
B7Z3U6;P05023;F5H3A1;P05023-2;F5GXJ7;B1AKY9;P50993;H0Y7C1;B4DIQ8;Q13733;Q5TC01;E9PRA5;Q5TC02;Q5TC05;E9PHR6	Sodium/potassium-transporting ATPase subunit alpha-1	ATP1A1	2272300000	3439800000	31.0815	31.6797
E7EUA5;F5GWS0;F8WA11;Q7Z460-2;B7ZLX3;Q7Z460-3;Q7Z460;C9JW97;F5H2E2;F5GWM7;H0Y5T1;F5H436;C9J151;C9JP76;H0YHV8	CLIP-associating protein 1	CLASP1	2273700000	908950000	31.0824	29.7596
Q9NWU2;B4DS00	Glucose-induced degradation protein 8 homolog	GID8	2275900000	296510000	31.0838	28.1435
P46778;G3V1B3	60S ribosomal protein L21	RPL21	2276500000	3248100000	31.0842	31.5969
Q16222-2;Q16222-3;Q16222;B1AR80	UDP-N-acetylhexosamine pyrophosphorylase;UDP-N-acetylgalactosamine pyrophosphorylase;UDP-N-acetylglucosamine pyrophosphorylase	UAP1	2277400000	1268000000	31.0847	30.2399
Q14739;C9JXK0;E7EVK9;C9JES9	Lamin-B receptor	LBR	2280500000	363700000	31.0867	28.4382
Q9BRR6-2;Q9BRR6;E7EQY8;Q9BRR6-3;Q9BRR6-4;Q9BRR6-5;Q9BRR6-6	ADP-dependent glucokinase	ADPGK	2281200000	2055500000	31.0871	30.9368
Q96AG4	Leucine-rich repeat-containing protein 59	LRRC59	2282100000	7642700000	31.0877	32.8314
P00918;E5RID5;E5RK37	Carbonic anhydrase 2	CA2	2282800000	2725000000	31.0882	31.3436
E9PLK3;P55786;B7Z463;F5H6U8;F5H0W3;E5RJ24;E7EWZ2;F5GZY4;A6NEC2;H0YDG0;E9PP11;H0YAQ6;A6NEC2-2;H0YCQ5;E9PJ74;H0YBP6;E9PRQ5;E9PJY4;E9PPD4;E9PJF9;E9PPT3;E9PP53;E9PPZ2;A6NEC2-3	Puromycin-sensitive aminopeptidase	NPEPPS	2290200000	5596400000	31.0928	32.3819
F6S0T5;O60341;O60341-2	Lysine-specific histone demethylase 1A	KDM1A	2291100000	5185100000	31.0934	32.2717
P42224;P42224-2;E7EPD2;D2KFR9;E7ENM1;E9PH66;H0YG89;Q14765	Signal transducer and activator of transcription 1-alpha/beta	STAT1	2292000000	4630300000	31.094	32.1085
Q9Y617;Q9Y617-2	Phosphoserine aminotransferase	PSAT1	2297000000	5503200000	31.0971	32.3576
O75367-2;O75367-3;O75367;B4DJC3;D6RCF2;Q5SQT3	Core histone macro-H2A.1;Histone H2A	H2AFY	2301300000	5513200000	31.0998	32.3602
P78316;E9PFK5;P78316-2;F5H653	Nucleolar protein 14	NOP14	2306900000	2336000000	31.1033	31.1214
P46779;H0YKD8;B4DEP9;E9PB24;H0YMF4;C9JB50;G5E9L2;H0YLP6	60S ribosomal protein L28	RPL28	2308300000	712720000	31.1042	29.4088
Q9Y4E8;E9PCQ3;Q9Y4E8-2;Q9Y4E8-3;H0YI31;Q9H8G9;F8W0H4;F8VZG8;H0YI26;H0YH96;F8VVY7	Ubiquitin carboxyl-terminal hydrolase 15	USP15	2309400000	1266900000	31.1049	30.2387
P35659;B4DFG0;B4DN37;D6RDA2;D6R9L5;H0Y8X0;H0Y993	Protein DEK	DEK	2332500000	5122300000	31.1192	32.2541
Q6PKG0;Q6PKG0-3;E5RH50;H0YBW1;H0YC73;H0YC33;Q659C4-7;Q659C4-6;Q659C4-5;Q659C4-2;E5RHK4;H0YAN4;H0YBR8;H0YAX9;H0YBM7	La-related protein 1	LARP1	2347500000	7471800000	31.1285	32.7988
Q5VW36	Focadhesin	FOCAD	2354200000	2844400000	31.1326	31.4055
Q96G03;F5H6V2;B4E0G8;E7ENQ8;E9PD70;H0Y921	Phosphoglucomutase-2	PGM2	2355000000	5105500000	31.1331	32.2494
P49643;P49643-2	DNA primase large subunit	PRIM2	2358100000	1090400000	31.135	30.0222
P48047	ATP synthase subunit O, mitochondrial	ATP5O	2378600000	5656600000	31.1475	32.3973
D6REN6;P12081;B3KWE1;B4DDD8;B4DY73;B4E1C5;E7ETE2;F5GZR5;C9JWK3;D6RF05	Histidine--tRNA ligase, cytoplasmic	HARS	2382700000	2081100000	31.15	30.9547
Q8NI36;D6R922;D6RIY8;D6RFM8	WD repeat-containing protein 36	WDR36	2383400000	5593500000	31.1504	32.3811
P47756-2;B1AK87;B1AK88;E7EQ40;P47756;B1AK85;F6USW4;F6Q0E3	F-actin-capping protein subunit beta	CAPZB	2388100000	3341700000	31.1532	31.6379
Q6GMV3	Putative peptidyl-tRNA hydrolase PTRHD1	PTRHD1	2395900000	649650000	31.1579	29.2751
P48556	26S proteasome non-ATPase regulatory subunit 8	PSMD8	2396200000	5659200000	31.1581	32.398
G3V1D3;G3V180;Q9NY33;F5H8L6;F5GXD5;Q9NY33-2;E9PQ14;E9PPK9;E9PKK8;E9PNX5;E9PQF2	Dipeptidyl peptidase 3	DPP3	2398400000	7038100000	31.1594	32.7125
O60888-3;O60888;O60888-2;C9IZG4;C9IZQ5	Protein CutA	CUTA	2404500000	1056300000	31.1631	29.9764
F5H604;E7ERI8;E7EW49;E3W994;O75122;F5H3X0;E9PBA6;B3KR06;E7ENG2;O75122-2;D6RBU8;C9J668	CLIP-associating protein 2	CLASP2	2405200000	604130000	31.1635	29.1703
Q9Y3U8	60S ribosomal protein L36	RPL36	2408700000	2817300000	31.1656	31.3917
P11387;E7ES89;Q969P6;E5RIC7;E7ESI1;E5RJ95;E5RFS0;E5RJ33;H0YBR3;H0YAR3;H0YC03;E5RGE7;E5RGR4;E5RFE3;E5RGR2	DNA topoisomerase 1	TOP1	2410400000	3759100000	31.1666	31.8077
B4DP11;Q15185;B4DP21;B4DDC6;B4DHP2	Prostaglandin E synthase 3	PTGES3	2417200000	9283200000	31.1707	33.112
Q16836;Q16836-2;E9PF18	Hydroxyacyl-coenzyme A dehydrogenase, mitochondrial	HADH	2418100000	1310900000	31.1712	30.2879
O60841	Eukaryotic translation initiation factor 5B	EIF5B	2430100000	9148900000	31.1784	33.091
P50914;E7EPB3;B7Z6S8	60S ribosomal protein L14	RPL14	2437900000	5589300000	31.183	32.38
Q14669;Q14CA3;Q14CF1;B4DYJ6;G5E9G6	E3 ubiquitin-protein ligase TRIP12	TRIP12	2438800000	1591400000	31.1835	30.5676
O60264;F5GZI1;F6TQG2;E9PCY3;P28370-2;P28370	SWI/SNF-related matrix-associated actin-dependent regulator of chromatin subfamily A member 5	SMARCA5	2440100000	6000000000	31.1843	32.4823
Q13283;F5H4D6;F8W7N6;E5RIZ6;E5RIF8;E5RH42;E5RJU8;Q5HYE9;E5RI46;E5RH00	Ras GTPase-activating protein-binding protein 1	G3BP1	2446900000	11033000000	31.1883	33.3611
P78417;Q5TA02;D3DRA3;F5H7H0;Q5TA01	Glutathione S-transferase omega-1	GSTO1	2448400000	2660000000	31.1892	31.3088
Q59F66;Q92841;C9JMU5;Q92841-1;Q92841-3;Q92841-2;G5E9L5;Q9UQL5	Probable ATP-dependent RNA helicase DDX17	DDX17	2448800000	7775200000	31.1894	32.8562
Q96PZ0;E7EUH7;H0Y863	Pseudouridylate synthase 7 homolog	PUS7	2449100000	2076700000	31.1896	30.9516
P26583;D6R9A6	High mobility group protein B2	HMGB2	2449300000	1254500000	31.1897	30.2245
A8MUW5;Q52LJ0;H0YNA1	Protein FAM98B	FAM98B	2450100000	1072400000	31.1902	29.9982
Q9ULZ3;Q9ULZ3-2;Q9ULZ3-3	Apoptosis-associated speck-like protein containing a CARD	PYCARD	2457700000	4027700000	31.1947	31.9073
Q5SY16	Polynucleotide 5-hydroxyl-kinase NOL9	NOL9	2508300000	831850000	31.2241	29.6317
P61011;B4DUW6;G3V4F7;G3V480;G3V346;G3V3L9	Signal recognition particle 54 kDa protein	SRP54	2508500000	3644500000	31.2242	31.7631
Q13619;A8MSH7;Q13619-2	Cullin-4A	CUL4A	2512600000	535850000	31.2265	28.9973
Q9P258	Protein RCC2	RCC2	2527900000	5346900000	31.2353	32.3161
E9PH12;Q7Z5K2;Q7Z5K2-2;Q7Z5K2-3;Q8WVX6	Wings apart-like protein homolog	WAPAL	2553900000	970050000	31.2501	29.8535
B4E2S7;P13473-2;P13473;P13473-3;H0YCG2;E7EVR5;B7Z2R9	Lysosome-associated membrane glycoprotein 2	LAMP2	2559100000	3299100000	31.253	31.6194
P24752;H0YEL7;G3XAB4;E9PRQ6;E9PKF3	Acetyl-CoA acetyltransferase, mitochondrial	ACAT1	2560700000	3784200000	31.2539	31.8173
P61221;D6R9I9;D6RGF4;H0Y990	ATP-binding cassette sub-family E member 1	ABCE1	2564100000	8958000000	31.2558	33.0605
P15374;E9PBF1;Q5TBK7	Ubiquitin carboxyl-terminal hydrolase isozyme L3	UCHL3	2575500000	967710000	31.2622	29.85
Q96TA1-2;Q96TA1;F5H3T0	Niban-like protein 1	FAM129B	2577600000	580130000	31.2634	29.1118
O15355;F5H7G7;Q59GB2	Protein phosphatase 1G	PPM1G	2578800000	2337600000	31.2641	31.1224
Q92835-2;Q92835;Q92835-3;F5GXI6;H0Y5Q9;C9JLW2;C9JF09	Phosphatidylinositol 3,4,5-trisphosphate 5-phosphatase 1	INPP5D	2581100000	7396000000	31.2653	32.7841
Q8NI27;H0Y815;E9PHG2;F2Z2V2;H0Y594;H0Y7U4;Q8NI27-2;B7ZBA0	THO complex subunit 2	THOC2	2584700000	4831200000	31.2673	32.1697
Q9H2D1;F5H2Q1;B4DUQ5;E5RGK5;E5RFL3;E5RGT9	Mitochondrial folate transporter/carrier	SLC25A32	2587300000	0	31.2688	#NUM!
P41091;Q2VIR3;F8W810;Q2VIR3-2	Eukaryotic translation initiation factor 2 subunit 3;Putative eukaryotic translation initiation factor 2 subunit 3-like protein	EIF2S3;EIF2S3L	2589900000	2354100000	31.2702	31.1325
P35250;P35250-2;F8WC37	Replication factor C subunit 2	RFC2	2596300000	4292800000	31.2738	31.9993
O75489;B4DFM8;E9PS48;G3V194;E9PKL8;E9PJE7	NADH dehydrogenase [ubiquinone] iron-sulfur protein 3, mitochondrial	NDUFS3	2599300000	3217800000	31.2755	31.5834
Q9Y6A4	Cilia- and flagella-associated protein 20	CFAP20	2604500000	1903600000	31.2784	30.8261
Q9Y3D6	Mitochondrial fission 1 protein	FIS1	2608000000	2794500000	31.2803	31.3799
P52732	Kinesin-like protein KIF11	KIF11	2608700000	3549100000	31.2807	31.7248
P49773;D6REP8;D6RE99;D6RD60;D6RC06	Histidine triad nucleotide-binding protein 1	HINT1	2619700000	4814700000	31.2868	32.1648
P16435;H0Y4R2;E7EVY7;F5H468;E7EMD0;E7EPN3;E7EWU0	NADPH--cytochrome P450 reductase	POR	2620500000	1033600000	31.2872	29.945
Q13347;Q5TFK1	Eukaryotic translation initiation factor 3 subunit I	EIF3I	2632600000	4445300000	31.2938	32.0496
P35244;B5MC59	Replication protein A 14 kDa subunit	RPA3	2632900000	1630200000	31.294	30.6024
Q8WWQ0;B5MEB1;E9PEB7;Q9NSI6-3;Q9NSI6-2;Q9NSI6	PH-interacting protein	PHIP	2633400000	593700000	31.2943	29.1452
O43684-2;O43684;B4DDM6	Mitotic checkpoint protein BUB3	BUB3	2644500000	2667100000	31.3003	31.3126
P25786;P25786-2;F5GX11;B4DEV8;F5H112	Proteasome subunit alpha type-1;Proteasome subunit alpha type	PSMA1	2648300000	6961100000	31.3024	32.6967
Q9P0J0;E7ENQ6	NADH dehydrogenase [ubiquinone] 1 alpha subcomplex subunit 13	NDUFA13	2648500000	1768500000	31.3025	30.7199
P40121;B4DU58;B8ZZS7;E7EUR2;E7EUE9;E7ENU9;B8ZZL6	Macrophage-capping protein	CAPG	2652600000	10238000000	31.3048	33.2532
Q9H3N1;G3V448	Thioredoxin-related transmembrane protein 1	TMX1	2657400000	4215800000	31.3074	31.9732
O75475;O75475-2	PC4 and SFRS1-interacting protein	PSIP1	2659500000	6293600000	31.3085	32.5512
P08621;P08621-2;P08621-3;P08621-4	U1 small nuclear ribonucleoprotein 70 kDa	SNRNP70	2679300000	1407700000	31.3192	30.3907
P51812;F5GYC4;B4DG22;B7ZB17;B1AXG1;F2Z2J1;Q15349;Q15349-3;Q15349-2;B7Z3B5;B1AXG2;Q9UK32;B7ZL90;D6R910;D6RHW7;D6RA62;D6RE03;Q5TI62;F5H2S9;B4DKT8;E7EWQ5;F8WAQ9;Q9Y2H9;O15021-2;O15021-3;O15021-1;O15021	Ribosomal protein S6 kinase alpha-3	RPS6KA3	2684800000	1617900000	31.3222	30.5915
P52597;B4DKS8	Heterogeneous nuclear ribonucleoprotein F;Heterogeneous nuclear ribonucleoprotein F, N-terminally processed	HNRNPF	2691400000	12384000000	31.3257	33.5278
F8WAK8;Q8N3U4;Q8N3U4-2;B1AMT4;B1AMT3;B1AMT1;B1AMT2;Q9UJ98-2;Q9UJ98;B1AMT0;C9J3T3	Cohesin subunit SA-2	STAG2	2704200000	1533000000	31.3326	30.5137
Q9NZ01;B3KSQ1;Q9NZ01-2	Very-long-chain enoyl-CoA reductase	TECR	2704700000	4536600000	31.3328	32.079
B7ZKK9;Q16537	Serine/threonine-protein phosphatase 2A 56 kDa regulatory subunit epsilon isoform	PPP2R5E	2705100000	157970000	31.333	27.2351
O15397;O15397-2;H0YFL8;F5H244;F5H2I3;H0YH64;F5GXT5	Importin-8	IPO8	2710900000	854410000	31.3361	29.6704
Q10713;B4DKL3;Q5SXN0;Q5SXN9	Mitochondrial-processing peptidase subunit alpha	PMPCA	2712300000	3895200000	31.3369	31.8591
P43246;E9PHA6;B4E2Z2;E7EU21;B4DL39;B4DSB9;E7EQQ1;E9PCI8;C9J809	DNA mismatch repair protein Msh2	MSH2	2712400000	5386100000	31.3369	32.3266
P36871;F5H857;P36871-2;B4DPV0	Phosphoglucomutase-1	PGM1	2715200000	3481600000	31.3384	31.6971
O00116;F5H632;B8ZZ81	Alkyldihydroxyacetonephosphate synthase, peroxisomal	AGPS	2716500000	9134400000	31.3391	33.0887
A6NHR9;A6NHR9-2;A6NHR9-3	Structural maintece of chromosomes flexible hinge domain-containing protein 1	SMCHD1	2716700000	6920700000	31.3392	32.6883
Q15019;Q15019-2;B5MCX3;C9JB25;C9J2Q4;C9J938;C9IY94;B5MC08;C9IZU3;C9JQJ4;C9JFT1;F8WB65;C9JZI2;C9JT15;C9JSE7;B5MD47	Septin-2	2016-09-02	2726400000	4160600000	31.3444	31.9541
Q32Q12;P22392-2;P22392;E7ERL0;O60361;E5RHP0;C9K028	Nucleoside diphosphate kinase;Nucleoside diphosphate kinase B	NME1-NME2;NME2;NME1	2726600000	9290000000	31.3445	33.113
Q7Z4W1	L-xylulose reductase	DCXR	2728600000	5096600000	31.3455	32.2469
P00492;F8WCE0;Q9NRG1-2;Q9NRG1	Hypoxanthine-guanine phosphoribosyltransferase	HPRT1	2736600000	9397700000	31.3497	33.1297
Q15907;P62491;P57735	Ras-related protein Rab-11B;Ras-related protein Rab-11A	RAB11B;RAB11A	2742700000	4787300000	31.3529	32.1566
P07339;C9JH19;F8WD96;F8W787	Cathepsin D;Cathepsin D light chain;Cathepsin D heavy chain	CTSD	2754700000	3163800000	31.3592	31.559
P61163;B4DXP9;F5H3I4	Alpha-centractin	ACTR1A	2759000000	2290800000	31.3615	31.0932
Q9BQA1;B4DP38;H0Y711	Methylosome protein 50	WDR77	2760500000	782890000	31.3623	29.5442
P30086;B4DRT4	Phosphatidylethanolamine-binding protein 1;Hippocampal cholinergic neurostimulating peptide	PEBP1	2762800000	7402900000	31.3635	32.7854
P55039;A8MZF9	Developmentally-regulated GTP-binding protein 2	DRG2	2774100000	1383900000	31.3694	30.3661
P55957;P55957-2;P55957-4;P55957-3	BH3-interacting domain death agonist;BH3-interacting domain death agonist p15;BH3-interacting domain death agonist p13;BH3-interacting domain death agonist p11	BID	2781900000	2391800000	31.3734	31.1554
Q8WXX5	DnaJ homolog subfamily C member 9	DNAJC9	2785700000	4068300000	31.3754	31.9218
O14976;E9PGR2;Q6P490;H0Y8H5;D6RC24;H0Y9M4;D6RAW3	Cyclin-G-associated kinase	GAK	2792700000	1910300000	31.379	30.8312
Q9Y3I0;E9PCW3;E7EQS9;E7EVP9	tRNA-splicing ligase RtcB homolog	RTCB	2801400000	3653200000	31.3835	31.7665
Q93009;H0Y3G8;F5H8E5;B7Z7T5;F5H2X1	Ubiquitin carboxyl-terminal hydrolase 7;Ubiquitin carboxyl-terminal hydrolase	USP7	2816200000	3346700000	31.3911	31.6401
Q9UMS4;F5GY56;H0YGZ5;H0YGF3;F5H2I0	Pre-mRNA-processing factor 19	PRPF19	2821500000	9173300000	31.3938	33.0948
Q9UHY7;D6RA00;F5GW88;Q9UHY7-2	Enolase-phosphatase E1	ENOPH1	2824900000	2151100000	31.3956	31.0024
P24539;Q5QNZ2	ATP synthase F(0) complex subunit B1, mitochondrial	ATP5F1	2839300000	2813800000	31.4029	31.3899
E7EU96;Q5U5J2;P68400;P68400-2	Casein kinase II subunit alpha	CSNK2A1	2855600000	7081500000	31.4111	32.7214
P54136;P54136-2;F5H3T8;E5RJM9;E5RH09;E5RI24	Arginine--tRNA ligase, cytoplasmic	RARS	2857500000	8625900000	31.4121	33.006
O75223;E7EU55;B8ZZK2;B8ZZN4;O75223-2;B8ZZR8	Gamma-glutamylcyclotransferase	GGCT	2861600000	1806900000	31.4142	30.7509
Q70J99;Q70J99-3;B4DTQ6;Q70J99-2	Protein unc-13 homolog D	UNC13D	2876600000	1702900000	31.4217	30.6653
P28066;B4E2V4	Proteasome subunit alpha type-5	PSMA5	2876800000	2709100000	31.4218	31.3352
P16615;P16615-5;P16615-2;P16615-3;P16615-4;O14983-2;O14983;Q8N3X5;B3KY17;F8VSH0	Sarcoplasmic/endoplasmic reticulum calcium ATPase 2	ATP2A2	2882200000	8806500000	31.4245	33.0359
P51149;C9J8S3;C9J592;C9J4V0;C9IZZ0;C9J4S4;C9J7D1	Ras-related protein Rab-7a	RAB7A	2882600000	14281000000	31.4247	33.7334
Q1KMD3	Heterogeneous nuclear ribonucleoprotein U-like protein 2	HNRNPUL2	2884400000	3378700000	31.4256	31.6538
Q9Y230;B3KQ59	RuvB-like 2	RUVBL2	2910900000	4764700000	31.4388	32.1497
Q96HE7;G3V2H0;G3V3E6;G3V5B3;G3V503	ERO1-like protein alpha	ERO1L	2912100000	5504400000	31.4394	32.3579
P00387-2;P00387;B7Z7L3;B1AHF3;F8WCX7	NADH-cytochrome b5 reductase 3;NADH-cytochrome b5 reductase 3 membrane-bound form;NADH-cytochrome b5 reductase 3 soluble form	CYB5R3	2921300000	5004600000	31.444	32.2206
O00160;H0Y2Q6;H0YLJ4;H0YNQ8	Unconventional myosin-If	MYO1F	2923800000	5394100000	31.4452	32.3287
H0YGW7;Q8NE71-2;Q8NE71;F8VQZ0;E9PC67;Q5STZ7;Q5STZ8	ATP-binding cassette sub-family F member 1	ABCF1	2939300000	5893000000	31.4528	32.4564
P84090;G3V279	Enhancer of rudimentary homolog	ERH	2941400000	1463300000	31.4539	30.4466
F5H801;E9PDF2;E9PCR7;Q02218-2;Q02218;E9PFG7;Q96DD3;C9J4G7;Q9ULD0;Q9ULD0-3;Q9ULD0-2	2-oxoglutarate dehydrogenase, mitochondrial	OGDH	2947300000	4661000000	31.4567	32.118
Q06210-2;Q06210;O94808;E5RJP4	Glutamine--fructose-6-phosphate aminotransferase [isomerizing] 1	GFPT1	2957900000	3429700000	31.4619	31.6754
Q02543;B4DM74	60S ribosomal protein L18a	RPL18A	2958100000	5986200000	31.462	32.479
Q9HDC9;H0Y512;Q9HDC9-2	Adipocyte plasma membrane-associated protein	APMAP	2966700000	2630000000	31.4662	31.2924
Q9BPX3;D6RA93;H0Y9Z8	Condensin complex subunit 3	NCAPG	2985000000	4077400000	31.4751	31.925
P16885	1-phosphatidylinositol 4,5-bisphosphate phosphodiesterase gamma-2	PLCG2	2986800000	1422700000	31.476	30.406
Q9H7Z7;A6NHH0	Prostaglandin E synthase 2;Prostaglandin E synthase 2 truncated form	PTGES2	3001900000	735250000	31.4832	29.4537
B4DYV2;Q9NXF1;E7ERG2;B7Z9D5	Testis-expressed sequence 10 protein	TEX10	3003300000	1714700000	31.4839	30.6753
F5H4I0;P09622;E9PEX6;B4DT69;B4DHG0;F8WDM5;F2Z2E3	Dihydrolipoyl dehydrogenase, mitochondrial	DLD	3010900000	6646000000	31.4875	32.6298
Q12849;B3KP14;F5H5I6;H0Y8R1;H0YAK1;B3KPW0	G-rich sequence factor 1	GRSF1	3016700000	2744500000	31.4903	31.3539
C9JNW5;P83731;C9JXB8	60S ribosomal protein L24	RPL24	3026100000	3871400000	31.4948	31.8502
P54577	Tyrosine--tRNA ligase, cytoplasmic;Tyrosine--tRNA ligase, cytoplasmic, N-terminally processed	YARS	3026200000	7570500000	31.4949	32.8177
Q86UX7-2;Q86UX7;F5H1C6;H0YFT5;F5H3I6	Fermitin family homolog 3	FERMT3	3041800000	6906300000	31.5023	32.6853
P0CW22;P08708;H0YN88;H0YK46;H0YN73	40S ribosomal protein S17-like;40S ribosomal protein S17	RPS17L;RPS17	3047500000	5196400000	31.505	32.2749
P05387;H0YDD8	60S acidic ribosomal protein P2	RPLP2	3064000000	7501100000	31.5128	32.8045
P07384;E9PRM1;E9PJJ3;E9PLC9;E9PMC6;E9PJA6;E9PSA6;E9PLQ6;E9PQB3;E9PLX0;E9PL37;E9PIA9	Calpain-1 catalytic subunit	CAPN1	3069100000	6923200000	31.5152	32.6888
P46776;E9PLL6;E9PJD9;E9PLX7	60S ribosomal protein L27a	RPL27A	3074000000	2420900000	31.5175	31.1729
O95782-2;O95782;E9PPZ3;E9PS94	AP-2 complex subunit alpha-1	AP2A1	3076400000	5618600000	31.5186	32.3876
P15311;E7EQR4	Ezrin	EZR	3084700000	8243200000	31.5225	32.9406
P31153;B4DN45;E9PBA7;E7EPQ0;Q00266	S-adenosylmethionine synthase isoform type-2	MAT2A	3086400000	7714100000	31.5233	32.8449
Q96FX7;H0Y2Q1	tRNA (adenine(58)-N(1))-methyltransferase catalytic subunit TRMT61A	TRMT61A	3101200000	3433100000	31.5302	31.6769
P39656;E7EWT1	Dolichyl-diphosphooligosaccharide--protein glycosyltransferase 48 kDa subunit	DDOST	3110200000	8873500000	31.5344	33.0469
P08754	Guanine nucleotide-binding protein G(k) subunit alpha	GNAI3	3121100000	336820000	31.5394	28.3274
Q4LE60;O14787-2;O14787;F5H8J7;E7EM99	Transportin-2	TNPO2 variant protein;TNPO2	3122700000	1091800000	31.5401	30.0241
B7Z3N1;Q969N2;Q969N2-4;F5GWY0;G8JLF5;Q969N2-2;B7Z1N3;Q969N2-3	GPI transamidase component PIG-T	PIGT	3122900000	1150600000	31.5402	30.0997
O75694;B4DLT2;O75694-2;E9PF10;D6RA13	Nuclear pore complex protein Nup155	NUP155	3132600000	8756700000	31.5447	33.0277
O43929;B7Z3D0;F5H069;CON__Q2YDI2;Q53SE3;C9JGH7;C9J2X8;B7Z632;Q5THS9;E9PHS2;B7Z4E2;B7Z346;Q96NJ5	Origin recognition complex subunit 4	ORC4	3133500000	1284300000	31.5451	30.2583
P09960;F8VV40;P09960-2;P09960-3;B4DEH5	Leukotriene A-4 hydrolase	LTA4H	3174000000	6849100000	31.5637	32.6733
Q92973-2;Q92973;Q92973-3;E5RI07;B4DSC0;E7EW37	Transportin-1	TNPO1	3182200000	3510300000	31.5674	31.7089
P21796;E7ER14;C9JI87	Voltage-dependent anion-selective channel protein 1	VDAC1	3182300000	8065600000	31.5674	32.9091
Q15427;Q5SZ64	Splicing factor 3B subunit 4	SF3B4	3186300000	891210000	31.5692	29.7312
Q9NU22;Q5T795;REV__P21359-3;REV__Q14931;REV__P21359-4;REV__P21359-2;REV__P21359	Midasin	MDN1	3189700000	3770000000	31.5708	31.8119
B3KXS5;P36776;F5GZ27	Lon protease homolog, mitochondrial	LONP1	3221800000	6118800000	31.5852	32.5106
Q12996;F5H0G6;E9PLP8;Q96QK4;E9PJ06;H0YE74;E9PB40	Cleavage stimulation factor subunit 3	CSTF3	3229900000	1578400000	31.5888	30.5558
P22087	rRNA 2-O-methyltransferase fibrillarin	FBL	3232600000	4500800000	31.59	32.0675
E7ENA8;Q9NTI5-2;Q9NTI5;B7Z5S1;Q9NTI5-3;A9IYQ1;E9PBP3;Q9NTI5-4;Q9NTI5-5	Sister chromatid cohesion protein PDS5 homolog B	PDS5B	3234600000	3268900000	31.5909	31.6062
A8K3Z3;P62195	26S protease regulatory subunit 8	PSMC5	3235700000	5614800000	31.5914	32.3866
P14868;Q68CR9;C9J7S3;C9JLC1;C9JQM9	Aspartate--tRNA ligase, cytoplasmic	DARS	3236600000	6249100000	31.5918	32.541
O75663;O75663-2	TIP41-like protein	TIPRL	3238000000	754670000	31.5925	29.4913
P14618;B4DUU6;E9PF79	Pyruvate kinase PKM	PKM	3249100000	4598800000	31.5974	32.0986
E7ETZ4;Q9Y6E2;B5MCH7;Q75MG1;B5MCE7;E7EMS9;C9JF98;E9PFD4;F8WDX8	Basic leucine zipper and W2 domain-containing protein 2	BZW2	3251800000	3717200000	31.5986	31.7916
E9PGT1;Q15631;B7Z5D9;B7Z3X8	Translin	TSN	3278200000	5216200000	31.6103	32.2804
Q86U38;A8MY76;B3KVY3;H0YJP7	Nucleolar protein 9	NOP9	3289300000	1201700000	31.6151	30.1624
Q96P11;Q96P11-2;B4DP79;C9JJU9;G3V0G9;Q63ZY6-5;Q63ZY6;Q63ZY6-4;Q3KNT7-2;Q3KNT7-3;Q3KNT7;Q63ZY6-6;Q63ZY6-2	Probable 28S rRNA (cytosine-C(5))-methyltransferase	NSUN5	3294200000	3773600000	31.6173	31.8133
B0V043;P26640;H0Y4A6;E7EVJ6;Q5SP20;B4DZ61;B0V044;A2ABF4;H0Y426;H0Y3X9	Valine--tRNA ligase	VARS	3297300000	4398300000	31.6186	32.0343
Q9NZI8;C9JT33;REV__F5GXG3;REV__Q15833	Insulin-like growth factor 2 mRNA-binding protein 1	IGF2BP1	3311300000	7752500000	31.6248	32.852
F5HGG6;P53634;H0YCY8;P53634-2;Q2HIY8	Dipeptidyl peptidase 1;Dipeptidyl peptidase 1 exclusion domain chain;Dipeptidyl peptidase 1 heavy chain;Dipeptidyl peptidase 1 light chain	CTSC	3315900000	13060000000	31.6268	33.6044
P06865;E9PGL4;B4DKE7	Beta-hexosaminidase subunit alpha	HEXA	3330800000	1930100000	31.6332	30.846
P35268	60S ribosomal protein L22	RPL22	3338500000	2675400000	31.6366	31.3171
O15144;E7EWG5;C9JTV5;G5E9J0;G5E9S7	Actin-related protein 2/3 complex subunit 2	ARPC2	3361300000	2685400000	31.6464	31.3225
P51659;E7EWE5;E9PB82;F5HE57;G5E9S2;E7ET17;E7ER27;E7EPL9	Peroxisomal multifunctional enzyme type 2;(3R)-hydroxyacyl-CoA dehydrogenase;Enoyl-CoA hydratase 2	HSD17B4	3375200000	4473000000	31.6523	32.0586
Q9BRF8;Q9BRF8-2	Serine/threonine-protein phosphatase CPPED1	CPPED1	3379000000	1918800000	31.6539	30.8376
O95831-3;O95831;O95831-2;E9PMA0;Q2QKE4;Q1L6K4;Q1L6K6	Apoptosis-inducing factor 1, mitochondrial	AIFM1	3388900000	7557400000	31.6582	32.8152
Q5T8R5;P53985;Q49A45;Q5T8R3;Q5T8R4	Monocarboxylate transporter 1	SLC16A1	3390300000	0	31.6588	#NUM!
Q15269;C9J544	Periodic tryptophan protein 2 homolog	PWP2	3395900000	5413600000	31.6611	32.3339
Q29RF7;Q29RF7-3;H0Y9L9;H0Y9X6	Sister chromatid cohesion protein PDS5 homolog A	PDS5A	3409900000	3704300000	31.6671	31.7866
O43837;O43837-2;E9PGU4;O43837-3	Isocitrate dehydrogenase [NAD] subunit beta, mitochondrial	IDH3B	3412400000	3685100000	31.6681	31.7791
O00505;H0Y4S9	Importin subunit alpha-4	KPNA3	3425800000	1683700000	31.6738	30.649
P31689;B7Z5C0;F5GZ88	DnaJ homolog subfamily A member 1	DNAJA1	3426700000	6029100000	31.6742	32.4893
P12814;Q1HE25;P12814-2;B7TY16;G3V2N5;H0YJW3;G3V2W4;H0YJ11;Q08043;G3V2X9;G3V5M4;G3V2E8;G3V380	Alpha-actinin-1	ACTN1	3427600000	12924000000	31.6746	33.5893
F5GZ28;P18858;B4DTU4;H0YFI6;B4E135	DNA ligase;DNA ligase 1	LIG1	3434200000	8336400000	31.6773	32.9568
B4DMT5;B3KSH1;O00303;H0YDT6;E9PQV8	Eukaryotic translation initiation factor 3 subunit F	EIF3F	3435500000	8816700000	31.6779	33.0376
P09382;F8WEI7	Galectin-1	LGALS1	3450400000	5283100000	31.6841	32.2987
Q13162;E9PEN3;A6NJJ0;A6NG45	Peroxiredoxin-4	PRDX4	3450500000	8434300000	31.6842	32.9736
P78346;E9PB02;C9JJX7;E9PFP4;Q5VU11;Q5VU10	Ribonuclease P protein subunit p30	RPP30	3457200000	1705900000	31.687	30.6679
P42695;G3V1A9;E9PKK4;E9PLE0;E9PQA3;E9PJ63;E9PL84;E9PJM8;E9PR72;E9PL95	Condensin-2 complex subunit D3	NCAPD3	3458800000	2308600000	31.6876	31.1044
Q8IXH7-4;Q8IXH7;Q8IXH7-3	Negative elongation factor C/D	NELFCD	3479300000	1432200000	31.6961	30.4156
Q04837;E7EUY5;C9K0U8	Single-stranded DNA-binding protein, mitochondrial	SSBP1	3479700000	891580000	31.6963	29.7318
Q9NTJ5;E9PGZ4;B4DK71;F8WDN7;C9JV50;F8WD07;F8WCQ2;C9J3E3	Phosphatidylinositide phosphatase SAC1	SACM1L	3484500000	5424100000	31.6983	32.3367
Q9H9J2	39S ribosomal protein L44, mitochondrial	MRPL44	3500700000	1171500000	31.705	30.1257
P26368-2;P26368	Splicing factor U2AF 65 kDa subunit	U2AF2	3512700000	8291300000	31.7099	32.949
O75531	Barrier-to-autointegration factor;Barrier-to-autointegration factor, N-terminally processed	BANF1	3513200000	2500300000	31.7101	31.2195
P60866;B4DW28;E5RJX2;E5RIP1;G3XAN0	40S ribosomal protein S20	RPS20	3548900000	1995400000	31.7247	30.894
P25789;H0YMZ1;H0YN18;H0YL69;H0YMA1;Q567Q5;H0YLC2;H0YKT8;H0YMI6;H0YKS0;H0YMV3;H0YLS6	Proteasome subunit alpha type-4;Proteasome subunit alpha type;Proteasome subunit beta type	PSMA4	3575100000	7534600000	31.7353	32.8109
D6RCM8;O95379-3;O95379-2;O95379;B7Z713;E5RIJ3	Tumor necrosis factor alpha-induced protein 8	TNFAIP8	3577900000	867260000	31.7365	29.6919
Q92769;B3KRS5;E5RFP9;E5RFI6;E5RJ04;E5RGV4;E5RHE7;E5RH52;E5RG37;E5RK19	Histone deacetylase 2	HDAC2	3584500000	2531800000	31.7391	31.2375
P49321-2;P49321;P49321-3;Q5T624;B4DS57;F5H3J2;H0YDS9;E9PI86;E9PRH9;H0YF33;E9PPQ8;E9PPR5	Nuclear autoantigenic sperm protein	NASP	3588200000	6401200000	31.7406	32.5757
P28482;B4DHN0;A8CZ64	Mitogen-activated protein kinase 1;Mitogen-activated protein kinase	MAPK1	3588700000	2013700000	31.7408	30.9072
Q13576;E7EWC2;F5H7S7;Q13576-2;D6R939;E9PDT6;F5H3D5;D6RDK8;D6R999;H0YA28;D6RGC6	Ras GTPase-activating-like protein IQGAP2	IQGAP2	3603100000	7081900000	31.7466	32.7215
Q8TEA8	D-tyrosyl-tRNA(Tyr) deacylase 1	DTD1	3607900000	1532500000	31.7485	30.5132
P30050;P30050-2	60S ribosomal protein L12	RPL12	3610100000	8007000000	31.7494	32.8986
F8W1R7;G8JLA2;G3V1V0;B7Z6Z4;P60660-2;P60660;F8VPF3;F8VZV5;G3V1Y7;F8VZU9;F8W180;H0YI43;F8VXL3	Myosin light polypeptide 6	PDE6H;MYL6	3611800000	8057300000	31.7501	32.9076
P05141	ADP/ATP translocase 2;ADP/ATP translocase 2, N-terminally processed	SLC25A5	3622400000	7041500000	31.7543	32.7132
P62942;Q5W0X3;Q1JUQ5;A8MSS1;Q5VVH2	Peptidyl-prolyl cis-trans isomerase FKBP1A;Peptidyl-prolyl cis-trans isomerase	FKBP1A	3625200000	3727700000	31.7554	31.7956
P49736;F5H3V0;F5H1E9;H0Y8E6;C9J013;C9JZ21;F8WDM3	DNA replication licensing factor MCM2	MCM2	3628700000	18878000000	31.7568	34.136
O75083;A8MVA9;O75083-3;D6RD66;B4DY05	WD repeat-containing protein 1	WDR1	3636700000	11799000000	31.76	33.4579
P14174	Macrophage migration inhibitory factor	MIF	3641000000	6846600000	31.7617	32.6727
P19105;O14950;P24844;Q9BUF9	Myosin regulatory light chain 12A;Myosin regulatory light chain 12B;Myosin regulatory light polypeptide 9	MYL12A;MYL12B;MYL9	3643400000	7493400000	31.7626	32.803
Q9P1F3;Q5SZC9	Costars family protein ABRACL	ABRACL	3651500000	1848300000	31.7658	30.7836
E5RHW4;O94905;E5RJ09;O94905-2;O94905-3	Erlin-2	ERLIN2	3717700000	1288400000	31.7918	30.2629
P38919;E9PBH4;F8WE11;C9JUF0	Eukaryotic initiation factor 4A-III;Eukaryotic initiation factor 4A-III, N-terminally processed	EIF4A3	3720900000	1780800000	31.793	30.7299
Q96P70	Importin-9	IPO9	3729300000	1530600000	31.7963	30.5115
Q53GS9;B9A018;B8ZZD1;B4DHT4;G5E9H0;C9JIU2;F8WC91;C9J0X5	U4/U6.U5 tri-snRNP-associated protein 2	USP39	3732000000	4731100000	31.7973	32.1395
P61978;P61978-2;B4DFF1;Q5T6W1	Heterogeneous nuclear ribonucleoprotein K	HNRNPK	3732800000	901780000	31.7976	29.7482
P37802;C9J5W6;Q9UI15	Transgelin-2	TAGLN2	3741400000	3014400000	31.8009	31.4892
Q5JVF3;C9J439;Q5JVF3-3;Q5JVF3-2;Q5JVF3-4;F8W955;F8WEF4	PCI domain-containing protein 2	PCID2	3746700000	2693500000	31.803	31.3268
Q00796;H0YLA4;H0YKB3;B7Z3A6	Sorbitol dehydrogenase	SORD	3763600000	15013000000	31.8095	33.8055
Q9Y316;Q5R2V8;Q9Y316-2;F8WCZ0;B5MCI6	Protein MEMO1	MEMO1	3778600000	3584000000	31.8152	31.7389
Q13085-2;Q13085;Q13085-4;Q13085-3;F8W6G0;F8W8T8;O00763-2;O00763;F6QQI9;H0YGH5;A8MYL5;E9PEW7	Acetyl-CoA carboxylase 1;Biotin carboxylase	ACACA	3783500000	5361200000	31.8171	32.3199
B4DK30;Q15029	116 kDa U5 small nuclear ribonucleoprotein component	EFTUD2	3790300000	13429000000	31.8197	33.6446
P10515;H0YDD4;E9PEJ4;F5H7M3;E7ESJ9;F5H0X9	Dihydrolipoyllysine-residue acetyltransferase component of pyruvate dehydrogenase complex, mitochondrial;Acetyltransferase component of pyruvate dehydrogenase complex	DLAT	3807700000	8064100000	31.8263	32.9089
C9JFR7;P99999;CON__P62894	Cytochrome c	CYCS	3808400000	7616200000	31.8265	32.8264
Q96RQ1;H0YI50;H0YI58;F8VPA6;F8W0R1;F8VR88;F8VUZ2;H0YHS0;H0YHJ8	Endoplasmic reticulum-Golgi intermediate compartment protein 2	ERGIC2;RLN3	3821700000	1429400000	31.8316	30.4128
Q9BQ52;G5E9D5;E9PGJ0;B4DPL9;E7ES68;Q9BQ52-3;Q9BQ52-2	Zinc phosphodiesterase ELAC protein 2	ELAC2	3823900000	4647800000	31.8324	32.1139
O43707;D6PXK4;E7EV83;F5GXS2	Alpha-actinin-4	ACTN4	3839100000	6283200000	31.8381	32.5489
F8WCF6;P59998;C9JWM7;F8WDD7;F6TTL5;E7ETI0;F8WE39;F8WDW3	Actin-related protein 2/3 complex subunit 4	ARPC4-TTLL3;ARPC4	3839100000	7697100000	31.8381	32.8417
P62854;Q5JNZ5;F8VZW7	40S ribosomal protein S26;Putative 40S ribosomal protein S26-like 1	RPS26;RPS26P11	3846500000	4931400000	31.8409	32.1994
P49755;G3V2K7	Transmembrane emp24 domain-containing protein 10	TMED10	3874300000	1503400000	31.8513	30.4856
Q16531;F5GY55;E7EPB0;B4DZP5;B4DG00;F5H2L3;F5H581;F5GWI0;F5GZY8;F5H0Y5;F5H775;F5GYG8;F5H6C5;F5H4N9;F5H238;F8WF81;F5H198;F5GZ34;F5H7A0	DNA damage-binding protein 1	DDB1	3874900000	11366000000	31.8515	33.404
B0UX83;G3V1Z5;P46379-2;P46379;P46379-3;F8VX53;E7EMZ4;F8VXY4;F6TH84;F6S6P2;F6UR09;F6U1F2;F6XTU0;F6RG75;F6WML8;F6VEM6;F6X9W3;F6U341;F6TC96;C9JAY9;E9PEC8;E7EPC5;H0Y4L1;H0Y710;H0Y7K4;H0Y759;H0Y410;H0Y583;H0Y571	Large proline-rich protein BAG6	BAG6	3885600000	5078500000	31.8555	32.2418
Q13043;Q13043-2;F5H5B4	Serine/threonine-protein kinase 4;Serine/threonine-protein kinase 4 37kDa subunit;Serine/threonine-protein kinase 4 18kDa subunit	STK4	3891200000	777600000	31.8576	29.5345
P62277;E9PS50	40S ribosomal protein S13	RPS13	3952600000	9396900000	31.8802	33.1295
P41218;H0Y6P3	Myeloid cell nuclear differentiation antigen	MNDA	3959700000	8764100000	31.8827	33.029
F5H365;Q15436;F5H6C4;B3KXI2;E7ES38;G3V531;G3V4V1;G3V1W4;G3V3G5;G3V2R6;G3V5X8;G3V4Q2	Protein transport protein Sec23A	SEC23A	3960000000	1375600000	31.8829	30.3574
E9PKF6;G8JLI3;Q5H9R7-6;Q5H9R7-2;Q5H9R7;Q5H9R7-5;Q5H9R7-3;Q5H9R7-4;E9PQP7;E9PNN8;H0YEN2;E9PK08;B4DP39;H0YDW1;E9PKG4;E9PJD8	Serine/threonine-protein phosphatase 6 regulatory subunit 3	PPP6R3	3968600000	1467100000	31.886	30.4503
P50416;P50416-2;E9PCP2;B7Z4U4;Q92523	Carnitine O-palmitoyltransferase 1, liver isoform	CPT1A	3981600000	3764000000	31.8907	31.8096
Q6DKI1;B7Z652	60S ribosomal protein L7-like 1	RPL7L1	3982700000	2387400000	31.8911	31.1528
P04183	Thymidine kinase, cytosolic	TK1	3987500000	532030000	31.8928	28.9869
O75607	Nucleoplasmin-3	NPM3	3990200000	1838400000	31.8938	30.7758
Q9BWS9;Q9BWS9-2;Q9BWS9-3;E9PPA0;E9PI70;E9PIP0;E9PRL3;E9PPH0;H0YDL6;H0YEA3;H0YCC4;E9PKF1;H0YC89	Chitinase domain-containing protein 1	CHID1	4006500000	2295100000	31.8997	31.0959
Q15404;A8KA46;F2Z2H2	Ras suppressor protein 1	RSU1	4025000000	1447100000	31.9063	30.4305
B4DZI8;P35606;D6RBT6;D6R997;D6RBZ7;D6RCL6;D6RBG7;H0YAC7;H0Y938	Coatomer subunit beta	COPB2	4039700000	9498500000	31.9116	33.1451
Q8N0U8;E7ETM5	Vitamin K epoxide reductase complex subunit 1-like protein 1	VKORC1L1	4053400000	652200000	31.9165	29.2807
Q5T4S7-3;Q5T4S7-4;Q5T4S7;Q5T4S7-2;Q5T4S7-5;B4DYV5;B4DPF6;Q5T4S7-6;Q5TBN9	E3 ubiquitin-protein ligase UBR4	UBR4	4092200000	2898000000	31.9302	31.4324
O95202;F8WBN9;O95202-2;O95202-3	LETM1 and EF-hand domain-containing protein 1, mitochondrial	LETM1	4105700000	4739900000	31.935	32.1422
P47897;B4DNN3;B4DWJ2;C9J165;B7Z840;C9JSG9;F2Z2V6	Glutamine--tRNA ligase	QARS	4125200000	12631000000	31.9418	33.5562
Q06187;Q5JY90;Q572P5;Q3MS94;Q3MS88;Q3MS95;Q3MS90;H0YGJ4	Tyrosine-protein kinase BTK	BTK	4127900000	2145000000	31.9428	30.9983
Q8IYS1	Peptidase M20 domain-containing protein 2	PM20D2	4132100000	1549700000	31.9442	30.5293
Q7L2E3;Q7L2E3-3;Q7L2E3-2;F6R0H4	Putative ATP-dependent RNA helicase DHX30	DHX30	4149200000	6936600000	31.9502	32.6916
A5YKK6;A5YKK6-2;F8WA87;A5YKK6-3;B5MDN3;A5YKK6-4;B3KPW6;F5H1F4	CCR4-NOT transcription complex subunit 1	CNOT1	4151500000	4587500000	31.951	32.0951
P62917;E9PKZ0;E9PKU4;E9PIZ3;G3V1A1;E7EW01;E9PP36	60S ribosomal protein L8	RPL8	4154400000	3137500000	31.952	31.547
Q96S52;Q96S52-2;F5H019;F5H3C8	GPI transamidase component PIG-S	PIGS	4159300000	832900000	31.9537	29.6336
B0QY89;Q9Y262;G8JLH4;B0QY90;B3KNG0;C9JHP4;C9K0Q7;H0Y7E6	Eukaryotic translation initiation factor 3 subunit L	EIF3L	4176100000	12101000000	31.9595	33.4944
P56192;A6NC17;B3KVK7;H0YIP0;H0YHV5;F5H2V6;F8VS26;F8W0M7;F8W0S4;F8VZZ9;H0YI94;H0YIC2;F8VPL7;H0YHL6;H0YI27	Methionine--tRNA ligase, cytoplasmic	MARS	4176700000	12844000000	31.9597	33.5804
P35754	Glutaredoxin-1	GLRX	4177600000	803330000	31.96	29.5814
Q9BVJ6;E9PEL7;F8WD00;Q9BVJ6-2;Q5TAP6	U3 small nucleolar RNA-associated protein 14 homolog A	UTP14A	4182000000	4270100000	31.9615	31.9916
P16401	Histone H1.5	HIST1H1B	4189600000	3133200000	31.9642	31.545
Q15833-2;Q15833;E7EQD5;F5GXG3;F5H146;B7Z3F4;F5H5Q4;B7Z1V5;P61764;P61764-2	Syntaxin-binding protein 2	STXBP2	4191100000	5274400000	31.9647	32.2964
E7ERH2;F8W8N3;P63208-2;P63208;E5RJR5;E5RGM3	S-phase kinase-associated protein 1	SKP1	4221700000	3245100000	31.9752	31.5956
F5GYQ5;Q5TBB1;G3XAJ1	Ribonuclease H2 subunit B	RNASEH2B	4224100000	783690000	31.976	29.5457
Q99714;Q99714-2;Q5H928	3-hydroxyacyl-CoA dehydrogenase type-2	HSD17B10	4249200000	5849600000	31.9845	32.4457
Q8WWY3;E7ESA8;E7EVX8;Q8WWY3-2;E7EU94;E7ESX0;E7EN72;Q8WWY3-3	U4/U6 small nuclear ribonucleoprotein Prp31	PRPF31	4258000000	1670600000	31.9875	30.6377
Q02880-2;Q02880;E9PCY5;B4DLV2	DNA topoisomerase 2-beta;DNA topoisomerase 2	TOP2B	4281100000	10663000000	31.9953	33.3119
Q9UHI6;E9PJ60;B4DWV7	Probable ATP-dependent RNA helicase DDX20	DDX20	4311200000	1309400000	32.0054	30.2863
P35270	Sepiapterin reductase	SPR	4321600000	780480000	32.0089	29.5398
P45880;P45880-2;P45880-1;Q5JSD2;Q5JSD1;B4DKM5;A2A3S1	Voltage-dependent anion-selective channel protein 2	VDAC2	4322400000	13307000000	32.0092	33.6315
A8MZ62;P40937;F8W9B4;F5H5S0;C9JH72;F5H304;E9PEP3;F5H0U6	Replication factor C subunit 5	RFC5	4336400000	7662400000	32.0139	32.8351
Q07960;E9PCG8;H0YE29;E9PNR6	Rho GTPase-activating protein 1	ARHGAP1	4352400000	3546000000	32.0192	31.7235
O60306;H0YH15;H0YLN9;REV__Q5JR59-4;REV__B4DYN0;REV__Q5JR59-3;REV__E7EPJ2;REV__C9JP63;REV__Q9NZM3-4;REV__E7EUQ1;REV__Q9NZM3-3;REV__Q5JR59;REV__E9PBE9;REV__Q9NZM3-2;REV__Q9NZM3	Intron-binding protein aquarius	AQR	4359500000	3167100000	32.0215	31.5605
P04040	Catalase	CAT	4362800000	8887000000	32.0226	33.049
Q14166;B1AH89;E9PGR8	Tubulin--tyrosine ligase-like protein 12	TTLL12	4364100000	6589500000	32.023	32.6175
P62879;E7EP32;C9JIS1;C9JXA5;C9JZN1;B3KPU1	Guanine nucleotide-binding protein G(I)/G(S)/G(T) subunit beta-2	GNB2	4391200000	1629700000	32.032	30.602
Q03701;F5H3Y6;C9J9W7	CCAAT/enhancer-binding protein zeta	CEBPZ	4406100000	3487200000	32.0369	31.6994
P49720	Proteasome subunit beta type-3	PSMB3	4416100000	5324800000	32.0401	32.3101
P12268;H0Y4R1;F5H247;E7ETK5	Inosine-5-monophosphate dehydrogenase 2	IMPDH2	4449200000	18075000000	32.0509	34.0733
Q13895;F8WBL2	Bystin	BYSL	4456300000	2431600000	32.0532	31.1793
P45974-2;P45974;F5H571	Ubiquitin carboxyl-terminal hydrolase 5	USP5	4458900000	3628000000	32.054	31.7565
Q92620;B4DVG8;B4DN69	Pre-mRNA-splicing factor ATP-dependent RNA helicase PRP16	DHX38	4464100000	1618200000	32.0557	30.5917
P58546;C9JL85	Myotrophin	MTPN	4483000000	3550000000	32.0618	31.7252
P52292;A8MYJ9	Importin subunit alpha-1	KPNA2	4514000000	12942000000	32.0718	33.5913
E9PRQ7;Q04323;B4E0P8;E9PJ81;Q04323-2;E9PS08	UBX domain-containing protein 1	UBXN1	4538000000	4457400000	32.0794	32.0536
P41250;F8WCK4	Glycine--tRNA ligase	GARS	4558200000	10320000000	32.0858	33.2647
P61353	60S ribosomal protein L27	RPL27	4578400000	4712100000	32.0922	32.1337
E9PD66;E7EVU8;Q7Z6Z7-2;Q7Z6Z7-3;Q7Z6Z7;H0Y5W0;Q5H962;H0Y659;H0Y7U1;E9PEH3;F5H1P2	E3 ubiquitin-protein ligase HUWE1	HUWE1	4581400000	6061900000	32.0931	32.4971
P06737;F5H816;E9PK47;E9PMM6	Glycogen phosphorylase, liver form;Phosphorylase	PYGL	4631800000	11540000000	32.1089	33.4259
Q8WX92	Negative elongation factor B	NELFB	4662200000	2190400000	32.1184	31.0285
B4E2V5;P27105;E7EQ93;B1AM77	Erythrocyte band 7 integral membrane protein	STOM	4663000000	1356300000	32.1186	30.337
P42285;F5H7E2;H0YAC4;H0Y8U3	Superkiller viralicidic activity 2-like 2	SKIV2L2	4672800000	3696300000	32.1216	31.7834
D6RIY6;Q06265;Q06265-2;D6R905;Q06265-3;Q06265-4;D6RA17;H0Y9L5;D6RAP4	Exosome complex component RRP45	EXOSC9	4673100000	418180000	32.1217	28.6395
O60763;O60763-2;F5H4X1;F5GYR8;F5GZ76;H0Y7C0;REV__Q5VZ89-5;REV__Q5VZ89-6;REV__Q5VZ89	General vesicular transport factor p115	USO1	4685900000	811700000	32.1257	29.5964
P37837;F2Z393;E9PM01;E9PKI8	Transaldolase	TALDO1	4686600000	3749400000	32.1259	31.804
P54886-2;P54886	Delta-1-pyrroline-5-carboxylate synthase;Glutamate 5-kinase;Gamma-glutamyl phosphate reductase	ALDH18A1	4696700000	11328000000	32.129	33.3992
Q8WVM8;B7Z738;B7Z594;B7Z4U7;B7Z5N7;G3V2M8;G3V4I1;G3V5F3;H0YJY1;G3V3K9;G3V363;H0YJS6	Sec1 family domain-containing protein 1	SCFD1	4732000000	1115000000	32.1398	30.0544
F5H8K4;O43242;B4DT72;H0YGV8	26S proteasome non-ATPase regulatory subunit 3	PSMD3	4737700000	5110500000	32.1415	32.2508
O43592;F8WDU6;F5GZM3;F5GYW6	Exportin-T	XPOT	4752100000	2935200000	32.1459	31.4508
P08758;D6RBL5;E7ENQ5;D6RBE9;E9PHT9;D6RCN3	Annexin A5;Annexin	ANXA5	4790200000	3295100000	32.1574	31.6177
Q96CS3;B4E2M8;D6RBG6	FAS-associated factor 2	FAF2	4818800000	878590000	32.166	29.7106
Q9NQZ2	Something about silencing protein 10	UTP3	4841000000	0	32.1727	#NUM!
O14975;Q6PF09;G3V1R7	Very long-chain acyl-CoA synthetase	SLC27A2	4846300000	2971200000	32.1742	31.4684
P06493;P06493-2;E5RIU6	Cyclin-dependent kinase 1	CDK1	4854800000	9847700000	32.1768	33.1971
P62280	40S ribosomal protein S11	RPS11	4878600000	3426800000	32.1838	31.6742
P62241;Q5JR95	40S ribosomal protein S8	RPS8	4887900000	16633000000	32.1866	33.9533
Q92922;F8WE13	SWI/SNF complex subunit SMARCC1	SMARCC1	4891600000	4237200000	32.1877	31.9805
P61086;P61086-2;B4DIZ2;D6RDM7;C9JGP1;D6RFX1	Ubiquitin-conjugating enzyme E2 K	UBE2K	4894100000	2820200000	32.1884	31.3932
P56182;F8W984;D6RE82	Ribosomal RNA processing protein 1 homolog A	RRP1	4895200000	1831800000	32.1887	30.7706
P50613;D6RAD4;D6R9G1;D6REC6;D6RFL0;D6RGG9;D6RI01;D6R9Z2;D6RF14;D6RIG9;Q9C098	Cyclin-dependent kinase 7	CDK7	4899000000	0	32.1898	#NUM!
Q06323;H0YNE3;A6NJG9;H0YKK6;H0YLU2	Proteasome activator complex subunit 1	PSME1	4906800000	11038000000	32.1921	33.3618
Q9H6R4-4;Q9H6R4;G8JLK7;Q9H6R4-2;F5H6M7;Q9H6R4-3	Nucleolar protein 6	NOL6	4910500000	5223700000	32.1932	32.2824
F5H897;Q12931	Heat shock protein 75 kDa, mitochondrial	TRAP1	4923100000	11977000000	32.1969	33.4795
Q8N995;Q01581;D6RIW1	Hydroxymethylglutaryl-CoA synthase, cytoplasmic	HMGCS1	4929900000	2132000000	32.1989	30.9896
Q9UHX1-4;Q9UHX1-6;Q9UHX1-2;Q9UHX1-3;Q9UHX1-5;Q9UHX1;E9PQ56;H0YEM1;E9PN18;E9PMU7;E9PL19;H0YCP8	Poly(U)-binding-splicing factor PUF60	PUF60	4953500000	5117100000	32.2058	32.2527
P52701;B4DF41;P52701-2;F5H769;F5H2F9;E7ER38;F8WAX8;C9JH55;C9J8Y8;C9J7Y7;F5H3S1;F8W7G9	DNA mismatch repair protein Msh6	MSH6	4956400000	8422000000	32.2066	32.9715
Q15021;F5GZJ1;E7EN77;F6SSY4;F5GZK7;F5H431;REV__Q02790	Condensin complex subunit 1	NCAPD2	4956600000	7032100000	32.2067	32.7113
F5GZ16;Q13200;E7EW34;E9PCS3;H0Y305;C9JPC0;F8WBS8	26S proteasome non-ATPase regulatory subunit 2	PSMD2	4964300000	21687000000	32.2089	34.3361
Q6NUQ4;Q6NUQ4-2;F5H3N2;B4DLT7	Transmembrane protein 214	TMEM214	5002300000	595280000	32.2199	29.149
Q15813;B7Z3P1	Tubulin-specific chaperone E	TBCE	5007100000	1235300000	32.2213	30.2022
Q99471;Q9C083;Q9C084;F8VNW6;F8VQZ2	Prefoldin subunit 5	PFDN5	5016800000	2047000000	32.2241	30.9309
Q6PJG6;Q6PJG6-2;Q6PJG6-3;F8WDN5	BRCA1-associated ATM activator 1	BRAT1	5063800000	2518700000	32.2376	31.23
P10599;B1ALW1	Thioredoxin	TXN	5082400000	12095000000	32.2429	33.4937
P30520;F8W9D6;Q5SY84;G3V2N1;Q8N142;Q8N142-2	Adenylosuccinate synthetase isozyme 2	ADSS	5095300000	5954400000	32.2465	32.4713
P00505;E7ERW2;B4DY39	Aspartate aminotransferase, mitochondrial	GOT2	5112900000	14032000000	32.2515	33.708
Q9H0D6;B4DZC3;Q9H0D6-2	5-3 exoribonuclease 2	XRN2	5124100000	7646700000	32.2547	32.8322
P27348;B4DMT8;E9PG15	14-3-3 protein theta	YWHAQ	5208200000	5483500000	32.2781	32.3524
Q6P1J9;B4DV47	Parafibromin	CDC73	5231500000	2018800000	32.2846	30.9109
P46063;F8WA66;F8WD97;F5H2L2;F5H4P4;F5H3W0;F5GYB7	ATP-dependent DNA helicase Q1	RECQL	5246200000	10599000000	32.2886	33.3032
P62269;Q5GGW2	40S ribosomal protein S18	RPS18	5272700000	4562200000	32.2959	32.0871
P12270;Q5SWX9	Nucleoprotein TPR	TPR	5273900000	7512600000	32.2962	32.8067
O14818;Q5JXJ2;O14818-2;H0Y586;E9PBC8;F5H3G5;Q8TAA3-2;Q8TAA3-5;Q8TAA3;F5GY34	Proteasome subunit alpha type-7	PSMA7	5294100000	7797700000	32.3017	32.8604
P32119;A6NIW5;A8K0C0	Peroxiredoxin-2	PRDX2	5296200000	7466800000	32.3023	32.7978
P07814;F5H7I7;E7EMN0	Bifunctional glutamate/proline--tRNA ligase;Glutamate--tRNA ligase;Proline--tRNA ligase	EPRS	5301600000	20772000000	32.3038	34.2739
B4DVQ5;F5H4V1;Q99613;B5ME19;B4DVU3;C9J1F3;B4DDN4;F5GZC5;B4DRU0;C9JJ55;F5H1I1;F5GZ22	Eukaryotic translation initiation factor 3 subunit C;Eukaryotic translation initiation factor 3 subunit C-like protein	EIF3C;EIF3CL	5318800000	7743500000	32.3085	32.8503
P53999;F5H1H8;D6RC37;D6R970	Activated RNA polymerase II transcriptional coactivator p15	SUB1	5345000000	10681000000	32.3155	33.3143
E7ETK0;P62847-2;P62847-3;P62847;E7EPK6	40S ribosomal protein S24	RPS24	5350200000	7515200000	32.3169	32.8072
F5GYQ4;P00367;F8WA20;B4DGN5;B3KV55;P49448;H0YFJ0	Glutamate dehydrogenase 1, mitochondrial;Glutamate dehydrogenase 2, mitochondrial	GLUD1;GLUD2	5364300000	13120000000	32.3207	33.611
P62851	40S ribosomal protein S25	RPS25	5413400000	9111300000	32.3339	33.085
E7EVW0;P28340;H0Y3D1	DNA polymerase delta catalytic subunit	POLD1	5418900000	2605700000	32.3354	31.279
P11940;E7EQV3;E7ERJ7;P11940-2;H0YAR2;Q9H361;H0YBQ4;H0YBN4;H0YB75;H0YB86;H0YAS6;E5RJB9;E5RGH3;E5RH24;H0YAS7;H0YAW6;Q4VXU2;H0YAP2;E5RHG7;Q4VY17;H0YC10;E5RGC4;E5RFD8;Q96DU9;E5RJM8	Polyadenylate-binding protein 1	PABPC1	5419100000	9575700000	32.3354	33.1567
P13995;Q7Z650;B4DY35;B8ZZU9;B9A062;F8W7P9;Q9H903-3;Q9H903-1;Q9H903-5;Q9H903	Bifunctional methylenetetrahydrofolate dehydrogenase/cyclohydrolase, mitochondrial;NAD-dependent methylenetetrahydrofolate dehydrogenase;Methenyltetrahydrofolate cyclohydrolase	MTHFD2	5430900000	1912300000	32.3385	30.8327
P62753;A2A3R5;A2A3R7	40S ribosomal protein S6	RPS6	5444000000	15166000000	32.342	33.8201
P41212;H0YG25	Transcription factor ETV6	ETV6	5447000000	807150000	32.3428	29.5883
A6NN80;P08133;E9PGK1;B7Z582;E5RK69;E7EMC6;E5RK63;E5RFF0;E5RJF5;E5RI05;E5RJR0;E5RIU8;H0YC77	Annexin A6;Annexin	ANXA6	5453500000	9076100000	32.3445	33.0794
O75947-2;O75947;F5H608	ATP synthase subunit d, mitochondrial	ATP5H	5456200000	2533900000	32.3452	31.2387
Q12769;C9JIP0;G3V198;E9PR16;C9J0U6;Q12769-3;E9PSI3;Q12769-2;E9PQY5	Nuclear pore complex protein Nup160	NUP160	5458700000	4125700000	32.3459	31.942
P61313;E7EQV9;E7ENU7;E7EX53;Q642I1;E7ERA2	60S ribosomal protein L15;Ribosomal protein L15	RPL15	5464100000	4393200000	32.3473	32.0326
Q8NBJ5;E9PC06	Procollagen galactosyltransferase 1	COLGALT1	5466200000	4780300000	32.3479	32.1545
O76003	Glutaredoxin-3	GLRX3	5469800000	6673900000	32.3488	32.6359
C9J5P2;P11388;P11388-2;P11388-3;P11388-4;C9J4C3	DNA topoisomerase 2-alpha	TOP2A	5485000000	6343100000	32.3528	32.5625
O00567;Q5JXT2;H0Y653;E9PDI8;H0YDU4	Nucleolar protein 56	NOP56	5491500000	12907000000	32.3546	33.5874
P53618;E9PP73;E9PP63;E9PKQ1	Coatomer subunit beta	COPB1	5535000000	9290300000	32.3659	33.1131
P33992;B1AHB1;E7EQY5;B1AHB2;C9JMJ8;B1AHA9;F8WBR1	DNA replication licensing factor MCM5	MCM5	5543600000	18820000000	32.3682	34.1315
O60832;A8MUT5;O60832-2;C9IYT0	H/ACA ribonucleoprotein complex subunit 4	DKC1	5548400000	9030700000	32.3694	33.0722
P40429;Q6NVV1;B4DNC8	60S ribosomal protein L13a	RPL13A	5556500000	9760800000	32.3715	33.1844
P14735;B7ZAU2;Q5T5N3	Insulin-degrading enzyme	IDE	5563600000	7730300000	32.3734	32.8479
Q6IN85-2;Q6IN85;G3V5Z3;Q6IN85-4;H0YIY8;Q6IN85-5;G3V5A2;G3V4R3;G3V231;H0YJN6	Serine/threonine-protein phosphatase 4 regulatory subunit 3A	SMEK1	5615100000	892780000	32.3867	29.7337
P31948;G3XAD8;F5H0T1;F5H783;F5GXD8;H0YGI8	Stress-induced-phosphoprotein 1	STIP1	5632800000	5887100000	32.3912	32.4549
P62249;Q6IPX4	40S ribosomal protein S16	RPS16	5644800000	11006000000	32.3943	33.3576
F5H698;Q9P2J5;B4DJ10;B4DER1;Q2TU79;F5H2Z9;E7EN15	Leucine--tRNA ligase, cytoplasmic	LARS	5652700000	13077000000	32.3963	33.6063
P15927;P15927-2;P15927-3;Q5TEJ7;Q5TEJ0	Replication protein A 32 kDa subunit	RPA2	5688000000	8000700000	32.4053	32.8975
P43490;Q5SYT8;F5H246;C9JG65;C9JF35	Nicotinamide phosphoribosyltransferase	NAMPT;NAMPTL	5693700000	3071000000	32.4067	31.5161
Q9Y2X3;F8WED0	Nucleolar protein 58	NOP58	5699100000	5772500000	32.4081	32.4265
Q9H993;F5GZY1	UPF0364 protein C6orf211	C6orf211	5710500000	977010000	32.411	29.8638
P46777;B3KTM6;Q5T7N0	60S ribosomal protein L5	RPL5	5714400000	13303000000	32.412	33.631
P26639;B4DEG8;G3XAN9;E7ERI3;D6R9F8;D6RCA5;D6RDJ6	Threonine--tRNA ligase, cytoplasmic	TARS	5734200000	13148000000	32.4169	33.6141
P04083;Q5T3N1;Q5T3N0	Annexin A1;Annexin	ANXA1	5745900000	7236000000	32.4199	32.7525
P62244	40S ribosomal protein S15a	RPS15A	5752700000	7196200000	32.4216	32.7446
Q13148;Q13148-2;B1AKP7;G3V162;Q13148-3;B4DJ45	TAR DNA-binding protein 43	TARDBP	5765200000	3415300000	32.4247	31.6694
Q8N1F7;B3KPQ8	Nuclear pore complex protein Nup93	NUP93	5768900000	11609000000	32.4256	33.4345
P26440;B3KVI7;H0YLC3;C9JUI0;H0YN10;H0YKV0	Isovaleryl-CoA dehydrogenase, mitochondrial	IVD	5788500000	0	32.4305	#NUM!
P57737;P57737-2;B3KSY4;E7EP81	Coronin-7;Coronin	CORO7;hCG_1787779	5808600000	4633100000	32.4355	32.1093
P51665;B4DXI8	26S proteasome non-ATPase regulatory subunit 7	PSMD7	5811700000	13301000000	32.4363	33.6308
P60228;E5RGA2;H0YBR5;E5RHS5;H0YAW4;E5RIT4;E5RII3;H0YBP5;E5RIP5;E5RJ25	Eukaryotic translation initiation factor 3 subunit E	EIF3E	5888400000	12050000000	32.4552	33.4883
E7EQZ9;A8K318;P14314	Glucosidase 2 subunit beta	PRKCSH	5898900000	5824500000	32.4578	32.4395
Q9Y2Z4;H0YHS6	Tyrosine--tRNA ligase, mitochondrial	YARS2	5901300000	2502300000	32.4584	31.2206
P62913;P62913-2;Q5VVC8;Q5VVC9	60S ribosomal protein L11	RPL11	5915800000	13544000000	32.4619	33.6569
Q9BUF5;B4DP54;B3KS31	Tubulin beta-6 chain	TUBB6	5992300000	4875900000	32.4805	32.183
Q68DQ7;P54687;F5H5E4;B7Z5L0;B3KY27;F5H2F2	Branched-chain-amino-acid aminotransferase, cytosolic	BCAT1	5994400000	6258400000	32.481	32.5431
F6RFD5;P60981;B4DYA6	Destrin	DSTN	6014200000	1060100000	32.4857	29.9816
P09429;Q5T7C4;Q5T7C6;E9PFF0;B2RPK0;Q5T7C0	High mobility group protein B1;Putative high mobility group protein B1-like 1	HMGB1;HMGB1P1	6016600000	8300600000	32.4863	32.9506
P46060;F8W7I9;H0Y4Q3;B0QYT5;B0QYT4;B0QYT6	Ran GTPase-activating protein 1	RANGAP1	6031300000	6304600000	32.4898	32.5538
Q14019	Coactosin-like protein	COTL1	6045800000	2067500000	32.4933	30.9452
P17812;B4DR64;B7Z9C4	CTP synthase 1	CTPS1	6074200000	3289300000	32.5	31.6151
Q08945;E9PMD4;E9PPZ7	FACT complex subunit SSRP1	SSRP1	6105000000	9200200000	32.5073	33.099
Q96KP4;Q96KP4-2	Cytosolic non-specific dipeptidase	CNDP2	6108600000	3489200000	32.5082	31.7002
Q9Y295;H0YI06;F8WEE0	Developmentally-regulated GTP-binding protein 1	DRG1	6123400000	6897100000	32.5117	32.6833
Q15843	NEDD8	NEDD8	6140900000	1339400000	32.5158	30.3189
Q9P035;B4DRF4	Very-long-chain (3R)-3-hydroxyacyl-CoA dehydratase 3	PTPLAD1	6149700000	5901300000	32.5179	32.4584
E9PKG1;Q99873-3;Q99873-2;G5E9B6;Q99873;E9PIX6;B4DJ87;E9PQ98;H0YDE4;E9PNR9;E9PMW9;E9PI83;Q9NR22-2;Q9NR22;E9PMZ2	Protein arginine N-methyltransferase 1	PRMT1	6157300000	16844000000	32.5197	33.9715
P31350;C9JXC1;H0Y855	Ribonucleoside-diphosphate reductase subunit M2	RRM2	6165000000	4854000000	32.5215	32.1765
F5H6I0;P61769;H0YLF3	Beta-2-microglobulin;Beta-2-microglobulin form pI 5.3	B2M	6170900000	6446500000	32.5228	32.5859
O75477;B0QZ43	Erlin-1	ERLIN1	6233400000	1025000000	32.5374	29.933
P21964-2;P21964;E7EMS6;E7EUU8;F8WBW9	Catechol O-methyltransferase	COMT	6265900000	3739600000	32.5449	31.8002
O43175;Q5SZU1;F5H634;F5GYN9	D-3-phosphoglycerate dehydrogenase	PHGDH	6273900000	2890600000	32.5467	31.4287
F5H345;P08397-2;P08397;G3V1P4;G5EA58;F5GY90;F5H226;F5H0P4;F5H4W5;F5H4X2	Porphobilinogen deaminase	HMBS	6288100000	1885600000	32.55	30.8124
Q9UBE0;B3KNJ4;F5GXX7;G3XAK6;B4DY66	SUMO-activating enzyme subunit 1;SUMO-activating enzyme subunit 1, N-terminally processed	SAE1	6300900000	6258900000	32.5529	32.5433
P08567	Pleckstrin	PLEK	6367300000	4312400000	32.568	32.0058
P55263;P55263-2;B7Z783;B7Z800	Adenosine kinase	ADK	6399900000	7544200000	32.5754	32.8127
O75323;C9IYJ3;C9K068;F8WBI5;C9J7B1	Protein NipSnap homolog 2	GBAS	6413100000	1473600000	32.5784	30.4567
P12236;Q9H0C2	ADP/ATP translocase 3;ADP/ATP translocase 3, N-terminally processed	SLC25A6	6426600000	967590000	32.5814	29.8498
P33316;H0YNW5;P33316-2;H0YKC5;H0YKI0;H0YMM5;H0YNJ9;H0Y477;H0YMP1	Deoxyuridine 5-triphosphate nucleotidohydrolase, mitochondrial	DUT	6434100000	8120300000	32.5831	32.9189
Q8TEM1;Q8TEM1-2	Nuclear pore membrane glycoprotein 210	NUP210	6449600000	16578000000	32.5866	33.9486
P62333;H0YJC0;H0YJS8;H0YJX2;H0YJE9;H0YJT1;H0YJD2;H0YJY8	26S protease regulatory subunit 10B	PSMC6	6492600000	3541600000	32.5961	31.7218
Q06830	Peroxiredoxin-1	PRDX1	6510600000	14064000000	32.6001	33.7113
P48735;B4DFL2;B4DSZ6;H0YL11	Isocitrate dehydrogenase [NADP], mitochondrial	IDH2	6521500000	9092400000	32.6026	33.082
P46940;H0YLE8;F5H7A1;F2Z2E2;Q86VI3;H0YKA5	Ras GTPase-activating-like protein IQGAP1	IQGAP1	6525200000	18378000000	32.6034	34.0973
Q14566	DNA replication licensing factor MCM6	MCM6	6527900000	15583000000	32.604	33.8593
P32969;D6RAN4;H0Y9V9;E7ESE0;B4E1M5;H0Y9R4	60S ribosomal protein L9	RPL9	6540400000	6892200000	32.6067	32.6823
B4DLN1;P52815;F8W9G5		MRPL12	6540600000	807300000	32.6068	29.5885
P46781;B5MCT8;C9JM19;F2Z3C0;A8MXK4	40S ribosomal protein S9	RPS9	6574200000	14049000000	32.6142	33.7097
O75691	Small subunit processome component 20 homolog	UTP20	6625700000	10631000000	32.6254	33.3076
Q9BVI4;F5H303;F5H5K6	Nucleolar complex protein 4 homolog	NOC4L	6676600000	2867100000	32.6365	31.4169
O14929;O14929-2;F8WEW1;F8W9G7	Histone acetyltransferase type B catalytic subunit	HAT1	6679500000	7607000000	32.6371	32.8247
P61247;D6RG13;F5H4F9;E9PFI5;H0Y8L7;D6RAT0;D6RB09;H0Y9Y4;D6R9B6;D6RAS7;D6RI02;D6RED7;D6RGE0	40S ribosomal protein S3a	RPS3A	6688000000	6943200000	32.6389	32.693
B3KTM8;Q9UBU8-2;H0YLJ3;Q9UBU8;B7Z6R1;H0YMJ0;H0YM21;H0YMT8;H0YLV1;H0YNE0	Mortality factor 4-like protein 1	MORF4L1	6704600000	2806100000	32.6425	31.3859
Q9Y265;Q9Y265-2;E7ETR0	RuvB-like 1	RUVBL1	6709300000	16514000000	32.6435	33.943
Q13057;Q13057-2;E9PDM5	Bifunctional coenzyme A synthase;Phosphopantetheine adenylyltransferase;Dephospho-CoA kinase	COASY	6731000000	3537500000	32.6482	31.7201
P61970	Nuclear transport factor 2	NUTF2	6732500000	9552500000	32.6485	33.1532
Q15691	Microtubule-associated protein RP/EB family member 1	MAPRE1	6742400000	5612500000	32.6506	32.386
P13667;C9JMN9	Protein disulfide-isomerase A4	PDIA4	6758100000	14297000000	32.654	33.735
Q8NF37	Lysophosphatidylcholine acyltransferase 1	LPCAT1	6763400000	16773000000	32.6551	33.9654
P54727;Q5W0S5;Q5W0S4;G5E9P0;H0Y579;E9PGR9	UV excision repair protein RAD23 homolog B	RAD23B	6770600000	1149800000	32.6566	30.0987
P62424;Q5T8U2;Q5T8U3	60S ribosomal protein L7a	RPL7A	6792100000	10902000000	32.6612	33.3439
O75821	Eukaryotic translation initiation factor 3 subunit G	EIF3G	6803000000	12482000000	32.6635	33.5391
Q08J23;B4DQW2;G3V1R4;D6RAS3	tRNA (cytosine(34)-C(5))-methyltransferase	NSUN2	6841300000	12947000000	32.6716	33.5919
Q15393;Q15393-3;Q15393-2	Splicing factor 3B subunit 3	SF3B3	6975200000	18400000000	32.6996	34.099
B7Z254;Q15084;F8WA83;B5MCQ5;Q15084-2	Protein disulfide-isomerase A6	PDIA6	7016500000	18000000000	32.7081	34.0673
Q58FF8	Putative heat shock protein HSP 90-beta 2	HSP90AB2P	7021900000	11442000000	32.7092	33.4136
Q15181;Q5SQT6	Inorganic pyrophosphatase	PPA1	7088200000	15723000000	32.7228	33.8722
P20700;E9PBF6	Lamin-B1	LMNB1	7109600000	4020300000	32.7271	31.9047
B1AVU8;P07602;C9JIZ6;F8W6Z6;P07602-2;P07602-3;F5H0X6;Q5BJH1	Prosaposin;Saposin-A;Saposin-B-Val;Saposin-B;Saposin-C;Saposin-D	PSAP	7154600000	5590000000	32.7362	32.3802
Q9GZS3;H0YN81;H0YL19;H0YMF9;H0YM76;H0YLA1	WD repeat-containing protein 61;WD repeat-containing protein 61, N-terminally processed	WDR61	7179700000	1033900000	32.7413	29.9454
Q86VP6;Q86VP6-2;H0YGP5;H0YH27;Q86VP6-3;F5H6I6;F8WBB8	Cullin-associated NEDD8-dissociated protein 1	CAND1	7206600000	14440000000	32.7467	33.7494
P62829;C9JD32;B9ZVP7	60S ribosomal protein L23	RPL23	7208100000	12612000000	32.747	33.5541
P53621;P53621-2	Coatomer subunit alpha;Xenin;Proxenin	COPA	7209000000	17352000000	32.7472	34.0144
P52209;F5H7U0;B4DQJ8;F5H0L3;B4DV68	6-phosphogluconate dehydrogenase, decarboxylating	PGD	7229400000	8267700000	32.7512	32.9448
P52789;E9PB90;P52790;Q2TB90-3;Q2TB90-2	Hexokinase-2	HK2	7299400000	7651000000	32.7651	32.833
B4DH52;P78347-2;P78347-4;P78347-3;P78347;Q86U51;C9J6M0;G8JLD9;Q86UP8-3;Q86UP8;Q6EKJ0	General transcription factor II-I	GTF2I	7331200000	13603000000	32.7714	33.6632
P23526;F5H737	Adenosylhomocysteinase	AHCY	7386200000	3910400000	32.7822	31.8647
P26373;F5H1S2	60S ribosomal protein L13	RPL13	7392200000	3724800000	32.7834	31.7945
P10768	S-formylglutathione hydrolase	ESD	7414400000	8921400000	32.7877	33.0546
Q13769;F8WCP5;C9JXG5;C9JCL9;C9JXU6;F5GZF3	THO complex subunit 5 homolog	THOC5	7420700000	1455800000	32.7889	30.4392
O00764;F2Z3F8;F2Z2Y4;O00764-3;O00764-2;A8MV33	Pyridoxal kinase	PDXK	7440100000	2241300000	32.7927	31.0617
Q5VY93;Q92974-3;Q92974-2;Q92974;F5H3H5;B7Z977;REV__E7ES93;REV__B4DTM4;REV__P0DJD0;REV__P0DJD1;REV__F8VYC4;REV__E7ESF1;REV__A6NKT7;REV__Q99666;REV__O14715	Rho guanine nucleotide exchange factor 2	ARHGEF2	7467600000	8246300000	32.798	32.9411
Q14152;F5H335	Eukaryotic translation initiation factor 3 subunit A	EIF3A	7492100000	16805000000	32.8027	33.9682
O75608;E5RGR0;O75608-2;E5RJA0;B4DP64;E5RH74;E5RK58;E5RJ48	Acyl-protein thioesterase 1	LYPLA1	7565000000	2139300000	32.8167	30.9945
G5E9M5;Q12906;Q12906-4;Q12906-6;C9JFV5;Q12906-5;Q12906-2;Q12906-3;B4DFG4	Interleukin enhancer-binding factor 3	ILF3	7606900000	23551000000	32.8247	34.4551
P24390	ER lumen protein-retaining receptor 1	KDELR1	7653500000	1585600000	32.8335	30.5624
A0FGR8-2;A0FGR8;A0FGR8-6;C9JGI7;A0FGR8-4;F2Z3K9;A0FGR8-5;A6NFV7	Extended synaptotagmin-2	ESYT2	7675200000	7794000000	32.8376	32.8597
O76021;B4DJ58	Ribosomal L1 domain-containing protein 1	RSL1D1	7720200000	5488600000	32.846	32.3538
Q9NR31;B4DQ19;H0Y5E8;E9PBN0;Q5SQT8	GTP-binding protein SAR1a	SAR1A	7721100000	1575000000	32.8462	30.5527
Q99623;F5GY37;B4DP75;B4DW05;F5GWA7;F5H3X6;F5H0C5;F5H2D2;F5H0S4	Prohibitin-2	PHB2	7722400000	18609000000	32.8464	34.1153
P30084	Enoyl-CoA hydratase, mitochondrial	ECHS1	7726500000	2846000000	32.8472	31.4063
P60842;B4DKP9;B4E102;E7EMV8	Eukaryotic initiation factor 4A-I	EIF4A1	7736200000	14664000000	32.849	33.7716
E7EU23;P50395;Q5SX88;Q5SX87;Q5SX90;Q5SX91;E9PFL7;Q5SX86	Rab GDP dissociation inhibitor beta	GDI2	7750400000	11345000000	32.8516	33.4013
Q09161	Nuclear cap-binding protein subunit 1	NCBP1	7757200000	4606900000	32.8529	32.1011
P62263;E5RH77;H0YB22	40S ribosomal protein S14	RPS14	7759000000	8627500000	32.8532	33.0063
Q15738;C9JDR0	Sterol-4-alpha-carboxylate 3-dehydrogenase, decarboxylating	NSDHL	7783200000	1621800000	32.8577	30.5949
P05388;F8VWS0;Q3B7A4;F8VU65;F8VW21;F8VPE8;G3V210;F8VQY6;F8VRK7;F8VZS0;F8VWV4;Q8NHW5;F8VS58;F8W1K8	60S acidic ribosomal protein P0;60S acidic ribosomal protein P0-like	RPLP0;RPLP0P6	7819700000	15418000000	32.8645	33.8439
P63244;D6RAC2;D6RHH4;D6RDF4;H0Y8W2;D6REE5;H0YAF8;D6R9Z1;D6R9L0;D6RFX4;H0YAM7;D6RAU2;E9PD14;D6RBD0;D6RFZ9;H0Y8R5;D6RF23;D6R909;D6RGK8;H0Y9P0;D6RHJ5;D6RDI0	Guanine nucleotide-binding protein subunit beta-2-like 1;Guanine nucleotide-binding protein subunit beta-2-like 1, N-terminally processed	GNB2L1	7824300000	14716000000	32.8653	33.7767
P39019	40S ribosomal protein S19	RPS19	7835900000	10036000000	32.8675	33.2245
Q9UJS0;Q546F9;F5GX33	Calcium-binding mitochondrial carrier protein Aralar2	SLC25A13	7926200000	3023900000	32.884	31.4938
P08670;B0YJC4;F5H288;B0YJC5;Q5JVS8;P41219;P17661;P41219-2;E7EMV2;E7ESP9;F8WC76;Q16352;E9PBF7;P07196;P07197;P12036-2;P12036	Vimentin	VIM	7934400000	25408000000	32.8855	34.5646
P29350;P29350-3;G3V0F8;P29350-2;F5H0N8;F5GZM7;F5H5H9;F5GY79;F5H1Z8;F5H1V7;F5H4Z1;F5GXD4	Tyrosine-protein phosphatase non-receptor type 6	PTPN6	7935400000	14994000000	32.8857	33.8037
P20618;H0Y3J2	Proteasome subunit beta type-1	PSMB1	8019200000	5274700000	32.9008	32.2964
Q9Y266	Nuclear migration protein nudC	NUDC	8040700000	5594300000	32.9047	32.3813
B4E2W0;P55084;F5GZQ3;B5MD38;C9JEY0;C9JE81;C9K0M0	Trifunctional enzyme subunit beta, mitochondrial;3-ketoacyl-CoA thiolase	HADHB	8055100000	9604800000	32.9073	33.1611
F5H2G1;F5GWX5;Q14839;Q14839-2;Q8TDI0;B1AK51;F5H2K7;F5GXP9;Q5TG85;F5GZM9;F2Z2R5;F5H6N4	Chromodomain-helicase-DNA-binding protein 4	CHD4	8062300000	8712000000	32.9085	33.0204
P02786;G3V0E5;F5H6B1;F8WBE5	Transferrin receptor protein 1;Transferrin receptor protein 1, serum form	TFRC	8107000000	14049000000	32.9165	33.7097
P46782	40S ribosomal protein S5;40S ribosomal protein S5, N-terminally processed	RPS5	8129400000	6902200000	32.9205	32.6844
A8MXP9;P43243;D6REM6;D6R991;H0Y8T4;B3KM87;B7ZAV5;D6R8Z5;Q68E03;D6RCM3;D6REK4;D6RBI2;D6RBK5;D6RE02;D6RIA2;D6RB45;D6R9F3;D6RAM9;D6RAY2;D6RBS2	Matrin-3	MATR3	8175200000	18476000000	32.9286	34.1049
P17980;E9PM69;E9PKD5;E9PMD8;E9PN50;E9PS45;E9PLG2;E9PLQ8;E9PRB8	26S protease regulatory subunit 6A	PSMC3	8194000000	7032200000	32.9319	32.7113
Q8NBS9;Q86UY0;B2RDM2	Thioredoxin domain-containing protein 5	TXNDC5	8261700000	14778000000	32.9438	33.7827
P23381;P23381-2;G3V3H8;G3V3Y5;G3V277;G3V423;G3V5U1;G3V456;H0YJP3;G3V3P2;G3V227;G3V2Y7;G3V3X0;G3V5W1;G3V3S7;G3V2F2;G3V3R3;G3V4S4;G3V313;G3V339;G3V2C0;G3V4C7;G3V4N8	Tryptophan--tRNA ligase, cytoplasmic;T1-TrpRS;T2-TrpRS	WARS	8265000000	16327000000	32.9444	33.9265
P48643;E7EWW2;E7ENZ3;B7ZAR1;E9PCA1;B4DYD8;D6RIZ7;H0Y914	T-complex protein 1 subunit epsilon	CCT5	8310400000	9944100000	32.9523	33.2112
P22102;P22102-2;F8WD69;B4DJ93;C9JBJ1;C9JTV6;C9JZG2;C9JKQ7	Trifunctional purine biosynthetic protein adenosine-3;Phosphoribosylamine--glycine ligase;Phosphoribosylformylglycinamidine cyclo-ligase;Phosphoribosylglycinamide formyltransferase	GART	8333600000	13725000000	32.9563	33.6761
P14866;A6NIT8	Heterogeneous nuclear ribonucleoprotein L	HNRNPL	8360300000	17424000000	32.9609	34.0204
Q9NVI1;Q9NVI1-2;Q9NVI1-1;F8W7R3;Q9NVI1-4	Fanconi anemia group I protein	FANCI	8393300000	4113000000	32.9666	31.9375
P27824;B4E2T8;D6RGY2;E7ETH2;H0Y9Q7;D6RFL1;F5H856;H0Y9H1;D6RDP7;D6RB85;D6RAU8;D6RAQ8;D6RHJ3;D6RD16;B4DRG2;O14967	Calnexin	CANX	8437800000	15895000000	32.9742	33.8879
P24534;C9JZW3;F2Z2G2;F8WF65	Elongation factor 1-beta	EEF1B2	8511400000	6077800000	32.9867	32.5009
P49902;B7Z382;Q5JUV4;E9PHF2;Q5JUV3;Q5JUV6;H0YHR8;REV__H0YES7;REV__F5GWJ3;REV__Q17RW3	Cytosolic purine 5-nucleotidase	NT5C2	8527300000	3429500000	32.9894	31.6754
P26358-2;P26358;F5GX68;H0YFC7;P26358-3	DNA (cytosine-5)-methyltransferase 1;Cytosine-specific methyltransferase	DNMT1	8539200000	17657000000	32.9915	34.0395
Q15397	Pumilio domain-containing protein KIAA0020	KIAA0020	8611200000	2368800000	33.0036	31.1415
B7Z9F1;P34897;Q8N1A5;B4DLV4;G3V2Y4;H0YIZ0;G3V5L0;G3V4W5;G3V540;G3V2W0;G3V241;G3V3Y8;G3V4T0;G3V4X0;G3V2E4;G3V2D2;G3V2Y1;G3V3C6	Serine hydroxymethyltransferase, mitochondrial;Serine hydroxymethyltransferase	SHMT2	8642500000	18002000000	33.0088	34.0674
Q13263;Q13263-2	Transcription intermediary factor 1-beta	TRIM28	8762300000	14871000000	33.0287	33.7918
P28838-2;P28838;H0Y9Q1;H0Y983	Cytosol aminopeptidase	LAP3	8777700000	9970600000	33.0312	33.215
Q16891-2;Q16891;B9A067;F5GZ32;Q16891-3;F8W9I1;C9J406;B8ZZQ7;B7WPJ1;D6RAW4	MICOS complex subunit MIC60	IMMT	8815200000	13914000000	33.0373	33.6958
P17987;E7ERF2;E7EQR6;F5H282;F5GZ03;F5H136;F5H676;F5H726;F5GZI8;F5GYL4;F5H7Y1	T-complex protein 1 subunit alpha	TCP1	8846300000	16092000000	33.0424	33.9056
P63010;P63010-2;Q7Z451;F5GYG9	AP-2 complex subunit beta	AP2B1	8886000000	4791100000	33.0489	32.1577
P62906	60S ribosomal protein L10a	RPL10A	8898200000	20779000000	33.0509	34.2744
Q99829;A6PVH9;F2Z2V0;E7ENH5;Q5JX58;Q5JX59;Q5JX60;Q5JX44;Q5JX56;Q5JX55;Q5JX54;E7EV27;H0Y524;Q5JX53	Copine-1	CPNE1	8947900000	2610000000	33.0589	31.2814
Q92797;Q92797-2;Q92797-3;H0Y2X6	Symplekin	SYMPK	8954100000	3923200000	33.0599	31.8694
F5GZS6;F5H4J7;P08195-2;P08195-3;P08195;P08195-4;B4E2Z3;F5H0E2;H0YFS2;F5GZI0;F5H867;F5GZR9;H0YFX4	4F2 cell-surface antigen heavy chain	SLC3A2	9010300000	15297000000	33.0689	33.8325
O00148;Q8N5M0;B1Q2N1	ATP-dependent RNA helicase DDX39A	DDX39A;DDX39	9019500000	4415700000	33.0704	32.04
Q9H8H0;B7Z5V9	Nucleolar protein 11	NOL11	9032200000	3157500000	33.0724	31.5561
E9PAL9;Q9H857-2;Q9H857;C9JTZ6;Q9H857-3;Q9H857-4;C9J036	5-nucleotidase domain-containing protein 2	NT5DC2	9037600000	1272300000	33.0733	30.2448
P23284	Peptidyl-prolyl cis-trans isomerase B	PPIB	9063300000	12314000000	33.0774	33.5196
E7ENH9;P53396;P53396-2;B4E3P0	ATP-citrate synthase	ACLY	9064600000	28889000000	33.0776	34.7498
P04632;Q96L46	Calpain small subunit 1	CAPNS1	9152900000	2478400000	33.0916	31.2068
Q9NTK5;Q9NTK5-3;Q9NTK5-2;C9JCJ9;C9JTK6	Obg-like ATPase 1	OLA1	9161500000	10307000000	33.0929	33.2629
Q7KZF4;E7ESM6	Staphylococcal nuclease domain-containing protein 1	SND1	9179600000	11625000000	33.0958	33.4365
P25398	40S ribosomal protein S12	RPS12	9197400000	14860000000	33.0986	33.7907
Q96T76;F8W9Y2;Q96T76-5;H0Y746;Q5T454;Q96T76-7;B0QZ77;F8WCH8;E9PDQ4;E9PGH9;H0Y7V3	MMS19 nucleotide excision repair protein homolog	MMS19	9305300000	4780700000	33.1154	32.1546
P63241;P63241-2;Q6IS14;F8WCJ1;C9J7B5;C9J4W5;Q9GZV4	Eukaryotic translation initiation factor 5A-1;Eukaryotic translation initiation factor 5A-1-like;Eukaryotic translation initiation factor 5A-2	EIF5A;EIF5AL1;EIF5A2	9410500000	10159000000	33.1316	33.242
P41252;F5H1M4;Q5TCD1;Q5TCC4;F5H434;Q5TCC5;Q5TCC6;Q5TCD2;Q5TCC9	Isoleucine--tRNA ligase, cytoplasmic	IARS	9434600000	15262000000	33.1353	33.8292
O00571;B4E3E8;B4DXX7;O15523;B4DLU5;B4E132;C9J081;B4E3C4;C9J8G5;B4DLA0;D6RCM4;E9PCD8;Q9NQI0-2;D6RDK4;Q9NQI0;H0Y960	ATP-dependent RNA helicase DDX3X;ATP-dependent RNA helicase DDX3Y	DDX3X;DDX3Y	9566100000	22609000000	33.1553	34.3962
P33991;E7EM48;E5RG31;E7ER43;E5RFJ8;E5RHP5;E5RK04;E5RFR3;E5RG53;Q9UJA3-2;E7EQU7	DNA replication licensing factor MCM4	MCM4	9568100000	19004000000	33.1556	34.1456
Q9P0S9	Transmembrane protein 14C	TMEM14C	9577700000	2541600000	33.157	31.2431
Q15046;Q15046-2;E9PDU1	Lysine--tRNA ligase	KARS	9650500000	14834000000	33.168	33.7882
O75844	CAAX prenyl protease 1 homolog	ZMPSTE24	9666500000	515060000	33.1703	28.9402
P61158;B4DXW1;F5H3P5;B4DTI0;C9IZN3;F8WEW2;F8WE84	Actin-related protein 3	ACTR3	9706500000	11637000000	33.1763	33.438
P31939;E9PBU3;F5GWY2;C9JLK0;F8WEF0	Bifunctional purine biosynthesis protein PURH;Phosphoribosylaminoimidazolecarboxamide formyltransferase;IMP cyclohydrolase	ATIC	9762800000	17664000000	33.1846	34.0401
P09874;F8WC10;Q5VX84;Q5VX85	Poly [ADP-ribose] polymerase 1	PARP1	9773500000	18211000000	33.1862	34.0841
B5MDF5;P62826;F5H018;B4DV51;H0YFC6	GTP-binding nuclear protein Ran	RAN	9773900000	26848000000	33.1863	34.6441
Q13838;F8VQ10;Q13838-2;Q5STU3;H0Y7G4;B4DP52;F6WLT2;F8VZL8;H0Y7X6;H0Y800;H0Y557;F6UN21;F6TRA5;F6UJC5;E9PP12;F6S4E6;B4DIJ6;H0Y4V8;H0Y6G9;H0Y6N8;F8W0J0;H0Y400;F6V772;F6QYI9;H0YCC6;F6R6M7;F6U6E2;F6QWI5;F6S2B7;F6SXL5;E7EMX2;H0Y6J9;H0Y6Y9	Spliceosome RNA helicase DDX39B	DDX39B;hCG_2005638	9865500000	14755000000	33.1997	33.7805
Q99497	Protein DJ-1	PARK7	9990700000	15478000000	33.2179	33.8495
Q7L2H7;B4E2Q4;H0YCQ8;E9PN86;E9PRY0;E9PRI2;E7ESM3	Eukaryotic translation initiation factor 3 subunit M	EIF3M	10010000000	20603000000	33.2207	34.2621
Q04446;E9PGM4;F5H378	1,4-alpha-glucan-branching enzyme	GBE1	10023000000	15507000000	33.2226	33.8522
Q9Y5B9;F5H063;G3V5A4;G3V401;G3V2X0	FACT complex subunit SPT16	SUPT16H	10038000000	13235000000	33.2248	33.6236
Q15645;H0YAL2;Q15645-2	Pachytene checkpoint protein 2 homolog	TRIP13	10056000000	14622000000	33.2273	33.7674
Q8WUM0;F5H5C2;A6NGS4;Q5T8N1;Q5TDI3	Nuclear pore complex protein Nup133	NUP133	10091000000	2716500000	33.2324	31.3391
P55060-3;P55060;B4DUC5;B4DM67;E7EPX1	Exportin-2	CSE1L	10118000000	1006900000	33.2362	29.9073
Q9Y678;F5GXH1;H0Y8X7;H0Y8G2	Coatomer subunit gamma-1	COPG1	10132000000	5878600000	33.2382	32.4528
Q6P2E9;Q6P2E9-2;B7Z7V8	Enhancer of mRNA-decapping protein 4	EDC4	10175000000	4537100000	33.2443	32.0791
E9PH29;P30048	Thioredoxin-dependent peroxide reductase, mitochondrial	PRDX3	10243000000	5070500000	33.2539	32.2395
Q9ULC4;Q9ULC4-3;Q9ULC4-2	Maligt T-cell-amplified sequence 1	MCTS1	10267000000	1482900000	33.2573	30.4658
P07954-2;P07954	Fumarate hydratase, mitochondrial	FH	10291000000	7669600000	33.2607	32.8365
P27695;G3V3M6;G3V5Q1;G3V5M0;G3V359;G3V3C7;G3V5D9;G3V574	DNA-(apurinic or apyrimidinic site) lyase;DNA-(apurinic or apyrimidinic site) lyase, mitochondrial	APEX1	10367000000	14827000000	33.2713	33.7875
Q15233;F5GYZ3;C9JYS8;C9IZL7;C9J4X2	Non-POU domain-containing octamer-binding protein	NONO	10387000000	30619000000	33.2741	34.8337
A6NJZ9;Q8WTT2;F5H677	Nucleolar complex protein 3 homolog	NOC3L	10453000000	4073900000	33.2832	31.9238
Q96QK1;F5GYF5	Vacuolar protein sorting-associated protein 35	VPS35	10469000000	17150000000	33.2854	33.9975
Q969Z0;C9JY22;Q969Z0-2;C9J7P5;C9IZN7;C9J5A2;C9J347	Protein TBRG4	TBRG4	10518000000	4495000000	33.2921	32.0657
Q15758;B4DWS4;E9PC01	Neutral amino acid transporter B(0)	SLC1A5	10521000000	11451000000	33.2926	33.4148
Q9HBI0;Q9HBI0-2;Q9HBI0-3	Gamma-parvin	PARVG	10616000000	1807500000	33.3055	30.7513
P09211;A8MX94	Glutathione S-transferase P	GSTP1	10631000000	22497000000	33.3076	34.389
H0Y8G5;Q14103-3;Q14103;H0YA96;B4DTC3;Q14103-4;Q14103-2;D6RAF8;F5H6R6;D6RF44;D6RBQ9;D6RD83	Heterogeneous nuclear ribonucleoprotein D0	HNRNPD	10662000000	9163800000	33.3118	33.0933
P11586;G3V2B8;F5H2F4;G3V3L6	C-1-tetrahydrofolate synthase, cytoplasmic;Methylenetetrahydrofolate dehydrogenase;Methenyltetrahydrofolate cyclohydrolase;Formyltetrahydrofolate synthetase;C-1-tetrahydrofolate synthase, cytoplasmic, N-terminally processed	MTHFD1	10743000000	24218000000	33.3227	34.4954
P62701;A6NH36;C9JEH7;Q8TD47;P22090;C9JQ55	40S ribosomal protein S4, X isoform	RPS4X	10744000000	14031000000	33.3228	33.7079
O60506;O60506-2;O60506-3;O60506-4;O60506-5;F6UXX1	Heterogeneous nuclear ribonucleoprotein Q	SYNCRIP	10755000000	17526000000	33.3243	34.0288
P23396;E9PL09;E9PPU1;E9PL45;F2Z2S8;H0YCJ7;H0YF32;H0YEU2;E9PQ96;E9PJH4;E9PK82;E9PSF4;E9PQX2;H0YES8;E9PJN9	40S ribosomal protein S3	RPS3	10840000000	15388000000	33.3356	33.8411
P50990;G5E9B2;B4DEM7;B4DQH4	T-complex protein 1 subunit theta	CCT8	10909000000	21045000000	33.3448	34.2928
Q16795;F5H0J3;F5GY40	NADH dehydrogenase [ubiquinone] 1 alpha subcomplex subunit 9, mitochondrial	NDUFA9	10993000000	2991200000	33.3559	31.4781
Q08211;F5GXA5;Q08211-2;REV__H0YA90;REV__Q7Z6J0-3	ATP-dependent RNA helicase A	DHX9	11083000000	18580000000	33.3676	34.113
Q14690;F5H7X0	Protein RRP5 homolog	PDCD11	11114000000	11750000000	33.3717	33.4519
P62258;P62258-2	14-3-3 protein epsilon	YWHAE	11123000000	7824700000	33.3728	32.8654
F8W181;Q02878;F8VZ45;F8VR69;F8VZA3;F8VWR1	60S ribosomal protein L6	RPL6	11166000000	17063000000	33.3784	33.9902
P22234;E9PBS1;P22234-2;D6RF62	Multifunctional protein ADE2;Phosphoribosylaminoimidazole-succinocarboxamide synthase;Phosphoribosylaminoimidazole carboxylase	PAICS	11333000000	29101000000	33.3998	34.7603
O60287	Nucleolar pre-ribosomal-associated protein 1	URB1	11422000000	2834100000	33.4111	31.4002
P17844;E7ETL9	Probable ATP-dependent RNA helicase DDX5	DDX5	11422000000	12603000000	33.4111	33.553
P23246;P23246-2;H0Y9K7;H0Y9U2	Splicing factor, proline- and glutamine-rich	SFPQ	11512000000	20706000000	33.4224	34.2693
P13693;E9PJF7;Q8TBK7;H0YCX0;Q56UQ5;Q9HAU6	Translationally-controlled tumor protein	TPT1	11539000000	28418000000	33.4258	34.7261
P30040;F8VY02;F8W1G0;C9J183	Endoplasmic reticulum resident protein 29	ERP29	11598000000	16561000000	33.4332	33.9471
P30041	Peroxiredoxin-6	PRDX6	11603000000	17792000000	33.4338	34.0505
Q9BWD1;B7Z233	Acetyl-CoA acetyltransferase, cytosolic	ACAT2	11774000000	3912200000	33.4549	31.8653
P33993;F5H776;F5H4S2;A4D2A2;P33993-2;C9J8M6	DNA replication licensing factor MCM7	MCM7	11784000000	26904000000	33.4561	34.6471
Q15365	Poly(rC)-binding protein 1	PCBP1	11792000000	15862000000	33.4571	33.8849
P13489;E9PIM9;E9PMJ3;E9PLZ3;H0YCR7;E9PIK5;E9PMN0;E9PMA9;E9PR82;E9PMI1	Ribonuclease inhibitor	RNH1	11795000000	5340800000	33.4575	32.3144
P46783;F6U211;Q9NQ39	40S ribosomal protein S10	RPS10	12077000000	6537000000	33.4915	32.606
P18124;A8MUD9;C9JIJ5;C9JZ88	60S ribosomal protein L7	RPL7	12203000000	14828000000	33.5065	33.7876
B4DLQ1;Q8IZ83;F8WBH3;F5H4B6;Q8IZ83-2	Aldehyde dehydrogenase family 16 member A1	ALDH16A1	12229000000	2863300000	33.5096	31.415
P13010;C9JZ81	X-ray repair cross-complementing protein 5	XRCC5	12238000000	33910000000	33.5106	34.981
F8W8C8;P55884;P55884-2;B4DV79;C9JZG1;C9JQN7	Eukaryotic translation initiation factor 3 subunit B	EIF3B	12242000000	17564000000	33.5111	34.0319
P07355;P07355-2;H0YN42;H0YMD0;H0YMU9;A6NMY6;H0YKS4;H0YM50;B3KRQ1;H0YNP5;H0YN28;H0YL33;H0YMM1;H0YKZ7;H0YLV6;H0YMT9;H0YKX9;H0YNA0;H0YKL9;H0YMW4;H0YN52;H0YKV8;H0YMD9;H0YNB8;H0YKN4;H0YLE2	Annexin A2;Annexin;Putative annexin A2-like protein	ANXA2;ANXA2P2	12262000000	14137000000	33.5135	33.7188
P25205;Q7Z6P5;E9PF11	DNA replication licensing factor MCM3	MCM3	12271000000	24782000000	33.5145	34.5286
B4DJV2;O75390;F8VRI6;F8VPA1;H0YIC4;H0YH82;F8VPF9;F8W1S4;F8VRP1;F8VX68;F8VR34;F8W4S1;F8VZK9;F8VX07;F8VWQ5;F8VTT8;F8VVF6;F8W642;F8VU34	Citrate synthase;Citrate synthase, mitochondrial	CS	12514000000	14946000000	33.5428	33.799
Q969X6;Q969X6-3;Q969X6-2	Cirhin	CIRH1A	12817000000	3780400000	33.5773	31.8159
P06744;B4DG39;Q59F85	Glucose-6-phosphate isomerase	GPI	12829000000	18534000000	33.5787	34.1095
P07741;G5E9J2	Adenine phosphoribosyltransferase	APRT	12885000000	7696400000	33.585	32.8415
Q92621;F2Z2D0;F8WCW4;E7ET25	Nuclear pore complex protein Nup205	NUP205	12898000000	8959800000	33.5864	33.0608
E9PL22;F5H4Z5;Q9Y4L1;F5H4X7;E9PJ21;F5GWH9;B7Z909;F5GXI3;Q9BST8;E9PSI5;Q9BXT5	Hypoxia up-regulated protein 1	HYOU1	12910000000	22157000000	33.5878	34.367
B7Z4V2;P38646;F5H3L8;D6RJI2;D6RA73;H0Y8S0;H0YBG6	Stress-70 protein, mitochondrial	HSPA9	13053000000	24980000000	33.6037	34.5401
P22626;P22626-2	Heterogeneous nuclear ribonucleoproteins A2/B1	HNRNPA2B1	13133000000	9026600000	33.6125	33.0715
E9PAQ6;P49368;P49368-2;B4DUR8;E9PRC8;Q5SZX6;E9PM09;Q5SZW8;Q5SZX9;E9PQ35	T-complex protein 1 subunit gamma	CCT3	13138000000	35763000000	33.613	35.0577
Q8N766-2;Q8N766;Q8N766-4;Q8N766-3;Q5TG60;Q5TG59	ER membrane protein complex subunit 1	EMC1	13352000000	2619500000	33.6363	31.2866
P00966;Q5T6L6;Q5T6L5;E9PDT0;Q5T6L7	Argininosuccinate synthase	ASS1	13373000000	18462000000	33.6386	34.1038
P20674	Cytochrome c oxidase subunit 5A, mitochondrial	COX5A	13479000000	4771000000	33.65	32.1516
P36578;E7EWF1;B4DMJ2;B4DP82	60S ribosomal protein L4	RPL4	13588000000	34838000000	33.6616	35.0199
P04843;F5H6I5;B7Z4L4;B4DNJ5;F8WF32	Dolichyl-diphosphooligosaccharide--protein glycosyltransferase subunit 1	RPN1	13635000000	24110000000	33.6666	34.4889
Q99832;B7Z4T9;B8ZZC9;F5GZK5;B7Z4Z7;B7Z1C9;A8MWI8;F8WAM2;F8WBP8	T-complex protein 1 subunit eta	CCT7	13684000000	22512000000	33.6718	34.39
P00403	Cytochrome c oxidase subunit 2	MT-CO2	13702000000	4061200000	33.6737	31.9193
P04818;Q8WYK3;Q8WYK4	Thymidylate synthase	TYMS	13773000000	4081100000	33.6811	31.9263
O95433;B4DUR9;G3V438;H0YJG7;G3V3W9;H0YJU2;H0YJ63;H0YJG6	Activator of 90 kDa heat shock protein ATPase homolog 1	AHSA1	14020000000	11942000000	33.7068	33.4753
F5H6K0;O43143	Putative pre-mRNA-splicing factor ATP-dependent RNA helicase DHX15	DHX15	14035000000	24115000000	33.7083	34.4892
P49915;B4DUT7;F8W720	GMP synthase [glutamine-hydrolyzing]	GMPS	14049000000	14890000000	33.7097	33.7936
P42785;A8MU24;B7Z7Q6;E9PIG4;E9PQB5;E9PL85;E9PQN3;E9PKN6;E9PNF7;E9PNJ1;E9PLY4;E9PL49;E9PR42	Lysosomal Pro-X carboxypeptidase	PRCP	14107000000	4265400000	33.7157	31.99
C9J9K3;P08865;A6NE09;C9JQR9	40S ribosomal protein SA	RPSA;RPSAP58	14247000000	48761000000	33.7299	35.505
Q9HAV4;C9J4N8;E7EQN7;E7EQK9;E2QRM3;H0Y9I3;H0Y3W3;C9JA76;E9PDL5	Exportin-5	XPO5	14259000000	6804700000	33.7312	32.6639
P50991;F5H5W3;B7Z9L0;B7Z2F4	T-complex protein 1 subunit delta	CCT4	14399000000	37101000000	33.7452	35.1107
F8VPD4;P27708;H0YGP4;P31327-2;P31327	CAD protein;Glutamine-dependent carbamoyl-phosphate synthase;Aspartate carbamoyltransferase;Dihydroorotase	CAD	14532000000	30591000000	33.7585	34.8324
P07737;CON__P02584	Profilin-1	PFN1	14547000000	14612000000	33.76	33.7664
P20290-2;P20290;D6RDG3;H0Y9Y1	Transcription factor BTF3	BTF3	14658000000	4370500000	33.771	32.0252
P15144;B4DP96;H0YKT6;H0YMC1;H0YM04;H0YLZ8	Aminopeptidase N	ANPEP	14757000000	33393000000	33.7807	34.9588
P13804;B4DT43;H0YLU7;H0YK49;H0YNX6;H0YL12;H0YKF0;H0YL83;H0YM12	Electron transfer flavoprotein subunit alpha, mitochondrial	ETFA	14903000000	5210900000	33.7949	32.2789
Q9UQE7	Structural maintece of chromosomes protein 3	SMC3	14965000000	8110000000	33.8009	32.9171
P22314;B4DDE4;E7ERL1;Q5JRR6;Q5JRR9;Q5JRS0;Q5JRS2;Q5JRS1;Q5JRS3	Ubiquitin-like modifier-activating enzyme 1	UBA1	15171000000	22167000000	33.8206	34.3677
P15880;H0YEN5;E9PMM9;E9PQD7;E9PPT0;E9PM36;D3DU83;H0YE27	40S ribosomal protein S2	RPS2	15198000000	37890000000	33.8232	35.1411
G8JLD5;O00429-4;O00429-5;O00429-3;O00429-2;O00429;O00429-6;F8W8D1;G8JL97;B4DGC9;F8VZ52;B4DPZ9;F8W1W3;B4DDQ3;F8VUJ9;F8VR28;F8VYL3;H0YHY4;H0YI79	Dynamin-1-like protein	DNM1L	15227000000	9472400000	33.8259	33.1411
P08579	U2 small nuclear ribonucleoprotein B	SNRPB2	15520000000	2221100000	33.8534	31.0486
P49411	Elongation factor Tu, mitochondrial	TUFM	15532000000	15949000000	33.8545	33.8927
P39023;F2Z3A5;G5E9G0;B5MCW2;F8WCR1	60S ribosomal protein L3	RPL3	15618000000	20168000000	33.8625	34.2313
Q16658;B3KTM9;C9JFC0;C9JPH9	Fascin	FSCN1	15628000000	36743000000	33.8634	35.0968
Q6P2Q9;F5H2I4	Pre-mRNA-processing-splicing factor 8	PRPF8	15787000000	32906000000	33.878	34.9376
Q9Y490;Q5TCU6	Talin-1	TLN1	15961000000	12669000000	33.8938	33.5606
P17174;B7Z1I2;B7Z7E9	Aspartate aminotransferase, cytoplasmic;Aspartate aminotransferase	GOT1	16054000000	6646600000	33.9022	32.63
Q07666;E7ET98;Q07666-2;Q07666-3;F5H5F6;O75525-2;O75525;Q5VWX1	KH domain-containing, RNA-binding, signal transduction-associated protein 1	KHDRBS1	16118000000	9589400000	33.908	33.1588
O43809;Q5HYH5	Cleavage and polyadenylation specificity factor subunit 5	NUDT21	16228000000	6857100000	33.9178	32.675
P61981;B4DE78;B4DHC4	14-3-3 protein gamma;14-3-3 protein gamma, N-terminally processed	YWHAG	16368000000	21246000000	33.9302	34.3065
Q9BQ67;E7EX09	Glutamate-rich WD repeat-containing protein 1	GRWD1	16483000000	6486600000	33.9403	32.5948
Q00839;B3KX72;Q00839-2;Q5RI18	Heterogeneous nuclear ribonucleoprotein U	HNRNPU	16515000000	25920000000	33.9431	34.5933
P06576;F8VPV9;H0YH81;F8W079;F8W0P7;H0YI37;F8VQY0	ATP synthase subunit beta, mitochondrial;ATP synthase subunit beta	ATP5B	16985000000	35207000000	33.9835	35.0351
P25705;A8K092	ATP synthase subunit alpha, mitochondrial	ATP5A1	17131000000	19391000000	33.9959	34.1747
Q9H0A0;E7ESU4;E9PMN9;E9PMU0;E9PJN6	N-acetyltransferase 10	NAT10	17351000000	6902400000	34.0143	32.6845
P05386	60S acidic ribosomal protein P1	RPLP1	17778000000	25795000000	34.0494	34.5864
Q92499;B4DME8;B4DPN6	ATP-dependent RNA helicase DDX1	DDX1	17981000000	13619000000	34.0658	33.6649
P49721	Proteasome subunit beta type-2	PSMB2	18371000000	8226300000	34.0967	32.9376
P40939;H0YFD6;B4DYP2	Trifunctional enzyme subunit alpha, mitochondrial;Long-chain enoyl-CoA hydratase;Long chain 3-hydroxyacyl-CoA dehydrogenase	HADHA	18595000000	21126000000	34.1142	34.2983
Q5T8U5;O15260;Q5T8U7;B7Z7A8;O15260-2;F5H7X6;B7Z6A4	Surfeit locus protein 4	SURF4	18693000000	4764100000	34.1218	32.1496
Q5JP53;F8VYX6;F8VW92;P07437;Q5ST81;F8VUJ7;E7EWR1;E7ENH1;E9PBJ4;F5H894	Tubulin beta chain	TUBB	18802000000	35094000000	34.1302	35.0305
Q9Y5L0-3;Q9Y5L0;C9J7E5;B5MD86;Q9Y5L0-1;E9PFH4;C9IZM0	Transportin-3	TNPO3	18857000000	4369700000	34.1344	32.0249
P60174-1;P60174;B7Z5D8	Triosephosphate isomerase	TPI1	19142000000	52247000000	34.156	35.6046
Q14697-2;Q14697;F5H6X6;E9PKU7;E9PNH1;H0YFL4	Neutral alpha-glucosidase AB	GANAB	19151000000	37802000000	34.1567	35.1377
B4DDF7;P30153;F5H3X9;E9PH38;B4E1Q0;E9PPI5;E9PNM7;E9PHZ6;C9J9C1	Serine/threonine-protein phosphatase 2A 65 kDa regulatory subunit A alpha isoform	PPP2R1A	19192000000	10582000000	34.1598	33.3009
P30566;E7ERF4;P30566-2;B4DUM2;B4DEP1;B0QY75	Adenylosuccinate lyase	ADSL	19409000000	3412500000	34.176	31.6682
E7ERW8;B9ZVX0;E9PHQ0;E7ET75;E9PEZ3;O60610-2;E9PEZ2;O60610;E7EMV0;F5H2N3;B4E2I7;E5RJ79	Protein diaphanous homolog 1	DIAPH1	19725000000	7581400000	34.1993	32.8198
Q9NR30-2;Q9NR30	Nucleolar RNA helicase 2	DDX21	20019000000	29798000000	34.2207	34.7945
P55072;C9IZA5;C9JUP7	Transitional endoplasmic reticulum ATPase	VCP	20204000000	45917000000	34.2339	35.4183
P52272;P52272-2;Q59ES8;F5H7Z1	Heterogeneous nuclear ribonucleoprotein M	HNRNPM	20260000000	46413000000	34.2379	35.4338
P26038;E9PNP4	Moesin	MSN	20357000000	35932000000	34.2448	35.0646
P05455;E9PFH8;E7ERC4;E9PGX9;E9PFL9;F5H673	Lupus La protein	SSB	20367000000	8778800000	34.2455	33.0314
Q13724;F5H6D0;C9J8D4;B8ZZE2;C9JDQ1;B4E3B8	Mannosyl-oligosaccharide glucosidase	MOGS	20529000000	8166700000	34.2569	32.9271
P78371;B7ZAT2;F5GWF6;F8VQ14	T-complex protein 1 subunit beta	CCT2	20587000000	39787000000	34.261	35.2116
F8VXY0;F8VRQ1;F8W6I7;P09651-2;P09651;F8VSB5;F8W1S7;P09651-3;F8VZ49;Q32P51;F8VTQ5;F8W646;H0YH80;F8VYN5	Heterogeneous nuclear ribonucleoprotein A1;Heterogeneous nuclear ribonucleoprotein A1, N-terminally processed;Heterogeneous nuclear ribonucleoprotein A1-like 2	HNRNPA1;HNRNPA1L2	20595000000	30312000000	34.2616	34.8192
O00299	Chloride intracellular channel protein 1	CLIC1	20718000000	56583000000	34.2702	35.7196
O96008;O96008-2	Mitochondrial import receptor subunit TOM40 homolog	TOMM40	20799000000	3783700000	34.2758	31.8172
H0Y3X3;Q9UQ80;F8VTY8;F8VRZ3;F8VR77;F8W0A3;H0YIN7;F8VZ69	Proliferation-associated protein 2G4	PA2G4	20878000000	30130000000	34.2813	34.8105
P25787;C9JCK5;Q6MZI6	Proteasome subunit alpha type-2	PSMA2	20991000000	4310000000	34.2891	32.005
P04075	Fructose-bisphosphate aldolase A	ALDOA	21160000000	35594000000	34.3006	35.0509
P07237;E7EPA8;B4DUA5;F5H8J2;H0Y3Z3	Protein disulfide-isomerase	P4HB	21466000000	33332000000	34.3213	34.9562
Q00325-2;Q00325;F8VVM2;F8VWQ0;F8VZL5;F8VWR4	Phosphate carrier protein, mitochondrial	SLC25A3	21627000000	30037000000	34.3321	34.806
Q9UJZ1;B4E1K7;F2Z2I8	Stomatin-like protein 2, mitochondrial	STOML2	21651000000	4042200000	34.3337	31.9125
P00491;G3V5M2;G3V308;G3V2H3;G3V393	Purine nucleoside phosphorylase	PNP	21814000000	35954000000	34.3445	35.0654
Q9Y285;B4E363	Phenylalanine--tRNA ligase alpha subunit	FARSA	21881000000	13428000000	34.349	33.6445
P11142;E9PKE3;E9PNE6;E7ET08;P11142-2;A8K7Q2;E9PN89;E9PLF4;E9PS65;E9PQQ4;E9PQK7;E9PK54;E9PPY6;E9PM13;E9PN25;E9PI65;B3KUS2;H0YIE7;E9PSH5	Heat shock cognate 71 kDa protein	HSPA8	22018000000	55420000000	34.358	35.6897
Q9NYU2-2;Q9NYU2;F8WCI2;F8WCE6	UDP-glucose:glycoprotein glucosyltransferase 1	UGGT1	22764000000	5403700000	34.406	32.3313
Q16576;Q5JP00;E9PC52;E9PFM2;Q5JP01;Q5JP02;Q5JNZ6;C9J7L0	Histone-binding protein RBBP7	RBBP7	22883000000	3317300000	34.4136	31.6274
P31146	Coronin-1A	CORO1A	22994000000	23253000000	34.4205	34.4367
P35579;P35579-2;H0Y3P4;Q5BKV1;B1AH99	Myosin-9	MYH9	23005000000	46802000000	34.4212	35.4459
P19338;Q9BQ02;E7EX81;C9JYW2;C9JLB1;C9J1H7;C9JWL1	Nucleolin	NCL	23410000000	45263000000	34.4464	35.3976
O14980;C9JKM9;C9J673;C9IZS4;C9JQ02;C9JV99;F8WF71;C9JF49;C9IYM2	Exportin-1	XPO1	23567000000	15300000000	34.456	33.8328
Q14204;H0YJ21	Cytoplasmic dynein 1 heavy chain 1	DYNC1H1	24149000000	31471000000	34.4912	34.8733
Q9NVP1;F5H863	ATP-dependent RNA helicase DDX18	DDX18	24223000000	6793700000	34.4957	32.6616
P12956;B1AHC9;B1AHC7;B1AHC8;F5H1I8	X-ray repair cross-complementing protein 6	XRCC6	24406000000	31647000000	34.5065	34.8813
Q09028-3;Q09028-2;Q09028;Q09028-4;H0YF10;H0YCT5;H0YDK2;H0YEU5;B4DRT0;E9PNS6;C9JPP3;C9J959;E9PND5	Histone-binding protein RBBP4	RBBP4	24548000000	5708200000	34.5149	32.4104
P61604;B8ZZL8;B8ZZ54	10 kDa heat shock protein, mitochondrial	HSPE1	25158000000	25724000000	34.5503	34.5824
P26641;B4DTG2;B4DUP0;E7EMT2	Elongation factor 1-gamma	EEF1G	25339000000	38481000000	34.5606	35.1634
P40926;G3XAL0;E9PDB2	Malate dehydrogenase, mitochondrial;Malate dehydrogenase	MDH2	26393000000	35275000000	34.6194	35.0379
P12004	Proliferating cell nuclear antigen	PCNA	26396000000	21182000000	34.6196	34.3021
Q5JTH9;E9PCK7;Q5JTH9-2;F5H456	RRP12-like protein	RRP12	27213000000	11905000000	34.6636	33.4708
P62937;B4DM82;F8WE65;C9J5S7;Q567Q0;Q9Y536;F5H284;E5RIZ5;A2BFH1	Peptidyl-prolyl cis-trans isomerase A;Peptidyl-prolyl cis-trans isomerase A, N-terminally processed;Peptidyl-prolyl cis-trans isomerase	PPIA	27297000000	50296000000	34.668	35.5497
P42704;F5H4J6;B8ZZ38;C9JCA9;C9JN30;Q9NP80-2	Leucine-rich PPR motif-containing protein, mitochondrial	LRPPRC	27664000000	55236000000	34.6873	35.6849
P40227;B4DPJ8;A6NCD2	T-complex protein 1 subunit zeta	CCT6A	28013000000	35712000000	34.7054	35.0557
O75533;B4DGZ4;E9PCH3;F8WC19	Splicing factor 3B subunit 1	SF3B1	28079000000	18329000000	34.7088	34.0934
P49588;E7ETK8	Alanine--tRNA ligase, cytoplasmic	AARS	28521000000	13877000000	34.7313	33.692
O75643;F5H447;F5H4C1;B4E0P5;C9JAQ9;O75643-2;A2RRQ7	U5 small nuclear ribonucleoprotein 200 kDa helicase	SNRNP200	28799000000	30567000000	34.7453	34.8313
P11021;B4DEF7	78 kDa glucose-regulated protein	HSPA5	29247000000	41813000000	34.7676	35.2832
P08238;Q58FF7;Q5T9W8;H0Y6E4;E9PHI1;H0Y5S7;E9PHI2;H0Y598;E9PHH7	Heat shock protein HSP 90-beta	HSP90AB1	29461000000	61181000000	34.7781	35.8324
P06733;P06733-2;E5RI09;E5RG95;E5RGZ4	Alpha-enolase	ENO1	29484000000	85177000000	34.7792	36.3097
P23528;G3V1A4;E9PP50;E9PK25;E9PQB7;E9PS23;E9PLJ3;G3V5P4;Q9Y281	Cofilin-1	CFL1	29499000000	21103000000	34.7799	34.2967
P31040;E9PBJ5;D6RFM5;E9PEF8;H0Y8X1;H0Y8S2	Succinate dehydrogenase [ubiquinone] flavoprotein subunit, mitochondrial	SDHA	29877000000	32487000000	34.7983	34.9191
A8MZ76;C9JE52;Q9UL46;H0YM70;H0YKU2;H0YLG1;H0YLD2	Proteasome activator complex subunit 2	PSME2	30354000000	10973000000	34.8212	33.3532
P18669;F2Z2J9;E7EMA8;Q8N0Y7;P15259	Phosphoglycerate mutase 1	PGAM1	30397000000	69924000000	34.8232	36.0251
Q00610-2;Q00610;P53675-2;P53675;F5H5N6	Clathrin heavy chain 1	CLTC	30760000000	38386000000	34.8403	35.1599
B4DR61;P61619;P61619-3;F8W776;Q8TC24;Q9H9S3-2;F8W773;Q9H9S3;C9JXC6;A6NK38;F2Z2C7;A6NIF9;C9JJV4	Protein transport protein Sec61 subunit alpha isoform 1	SEC61A1	30889000000	4482000000	34.8464	32.0615
P63104;E7EX29;B0AZS6;E7ESK7;E7EX24;B7Z2E6;H0YB80;E5RIR4;E9PD24;E7EVZ2;E5RGE1	14-3-3 protein zeta/delta	YWHAZ	31282000000	12842000000	34.8646	33.5802
P98179	Putative RNA-binding protein 3	RBM3	31720000000	4163700000	34.8847	31.9552
Q9H583;Q5T3Q7;Q6P664	HEAT repeat-containing protein 1;HEAT repeat-containing protein 1, N-terminally processed	HEATR1	31811000000	7930500000	34.8888	32.8848
P78527;E7EUY0;P78527-2;F5GX40;H0YG84	DNA-dependent protein kinase catalytic subunit	PRKDC	32870000000	67516000000	34.9361	35.9745
Q16777;Q6FI13	Histone H2A type 2-C;Histone H2A type 2-A	HIST2H2AC;HIST2H2AA3	33514000000	8384400000	34.964	32.9651
Q8TEX9;Q8TEX9-2;H0YN14;H0Y3R2;H0YMR4;H0YN07;H0YLV0;H0YL92;H0YKG5;H0YK93	Importin-4	IPO4	34883000000	15355000000	35.0218	33.838
P29401;E7EPA7;B4E022;B3KSI4;E9PFF2;F8W888;F8WAX4	Transketolase	TKT	35188000000	43908000000	35.0344	35.3538
Q9BSJ8-2;Q9BSJ8;B3KY56;F8VZB1	Extended synaptotagmin-1	ESYT1	35347000000	15475000000	35.0409	33.8492
O95373;E9PLB2;E9PLJ0	Importin-7	IPO7	39067000000	8466700000	35.1852	32.9792
P04844;Q5JYR6;A6NKT1;Q5JYR7;Q5JYR4;Q5JYR3;F2Z3K5;Q5JYR2;H0Y5M1	Dolichyl-diphosphooligosaccharide--protein glycosyltransferase subunit 2	RPN2	39733000000	16129000000	35.2096	33.9089
Q92616	Translational activator GCN1	GCN1L1	40130000000	18091000000	35.224	34.0746
P62841	40S ribosomal protein S15	RPS15	43130000000	21021000000	35.328	34.2911
Q14974;B7ZAV6;F5H4R7	Importin subunit beta-1	KPNB1	43971000000	25182000000	35.3558	34.5517
P07900;P07900-2;Q86U12;G3V2J8;Q14568;Q58FG0	Heat shock protein HSP 90-alpha	HSP90AA1	44841000000	77405000000	35.3841	36.1717
P49327;F5H0D4	Fatty acid synthase;[Acyl-carrier-protein] S-acetyltransferase;[Acyl-carrier-protein] S-malonyltransferase;3-oxoacyl-[acyl-carrier-protein] synthase;3-oxoacyl-[acyl-carrier-protein] reductase;3-hydroxyacyl-[acyl-carrier-protein] dehydratase;Enoyl-[acyl-carrier-protein] reductase;Oleoyl-[acyl-carrier-protein] hydrolase	FASN	45932000000	97735000000	35.4188	36.5082
Q9UNM6;Q9UNM6-2;B4DJ66;E9PL38;H0YD73;E9PQG3;E9PPD2;F8W8J6	26S proteasome non-ATPase regulatory subunit 13	PSMD13	45996000000	14042000000	35.4208	33.709
P00558;B7Z7A9;B4E1H9;E7ERH5;B4DHM5	Phosphoglycerate kinase 1;Phosphoglycerate kinase	PGK1	46452000000	67537000000	35.435	35.975
P14625;E9PEX3;Q96GW1;H0YIV0;Q58FF3;F8W026	Endoplasmin	HSP90B1	48065000000	54970000000	35.4843	35.6779
P62805	Histone H4	HIST1H4A	49363000000	107150000000	35.5227	36.6408
P52566;H0YGX7;F5H3P3;F5H6Q0;F5H2R5	Rho GDP-dissociation inhibitor 2	ARHGDIB	53661000000	45064000000	35.6432	35.3913
P30101;B3KQT9;G5EA52;F5H119	Protein disulfide-isomerase A3;Protein disulfide-isomerase	PDIA3	55241000000	39357000000	35.685	35.1959
Q12905	Interleukin enhancer-binding factor 2	ILF2	56561000000	25140000000	35.7191	34.5493
P06748;Q9BYG9;P06748-2;E5RI98;E5RGW4	Nucleophosmin	NPM1	60277000000	81976000000	35.8109	36.2545
P35232;C9JW96;C9JZ20;E7ESE2;E9PCW0;B4DY47;D6RBK0	Prohibitin	PHB	65327000000	23688000000	35.927	34.4634
P13639;B4DPU3;F5H370;F5GZG3;B4DMC6	Elongation factor 2	EEF2	70510000000	92570000000	36.0371	36.4298
P62081;B5MCP9	40S ribosomal protein S7	RPS7	70764000000	33295000000	36.0423	34.9546
P00338;P00338-3;P00338-2;E9PH51;B4DKQ2;F5H308;A8MXQ4;F8W819;F5GXY2;F5GYU2;F5GXH2;F5H5J4;F5H6W8;F5GZQ4;F5H8H6;F5GXC7;F5GWW2;F5GXU1;F5H5G7;F5H155;G3XAP5;F5H245;P07864	L-lactate dehydrogenase A chain	LDHA	71809000000	96589000000	36.0634	36.4911
Q01105;B2REB8;A6NGV1;Q5VXV2;Q01105-2	Protein SET	SET	75781000000	11661000000	36.1411	33.441
P26599;P26599-2;Q9BUQ0;A6NLN1	Polypyrimidine tract-binding protein 1	PTBP1	76081000000	24672000000	36.1468	34.5222
P13796;Q5TBN3;B4DUA0;Q5TBN5	Plastin-2	LCP1	93505000000	94536000000	36.4443	36.4601
P68104;Q5VTE0;Q6IQ15;F8W6I0;Q5JR01;A6PW80;E7EPH7	Elongation factor 1-alpha 1;Putative elongation factor 1-alpha-like 3	EEF1A1;EEF1A1P5	108840000000	63882000000	36.6634	35.8947
P27797;B4E2Y9	Calreticulin	CALR	110800000000	82797000000	36.6892	36.2689
P10809;E7EXB4;E7ESH4;B7Z712;C9JL25;C9JCQ4;C9JL19;C9J0S9;F8WBB1	60 kDa heat shock protein, mitochondrial	HSPD1	117370000000	59273000000	36.7723	35.7867
P84243;B4DEB1	Histone H3.3;Histone H3	H3F3A	131760000000	18171000000	36.9391	34.0809
P07195;A8MW50;C9J7H8;F5H793	L-lactate dehydrogenase B chain;L-lactate dehydrogenase	LDHB	153520000000	124840000000	37.1596	36.8613
Q71DI3	Histone H3.2	HIST2H3A	154170000000	22595000000	37.1657	34.3953
P68431;Q16695;Q6NXT2	Histone H3.1;Histone H3.1t;Histone H3.3C	HIST1H3A;HIST3H3;H3F3C	157130000000	25548000000	37.1932	34.5725
P04406;E7EUT4;E7EUT5;E7EU54	Glyceraldehyde-3-phosphate dehydrogenase	GAPDH	191350000000	172410000000	37.4774	37.3271
Q9H9S5	Fukutin-related protein	FKRP	0	4385600	#NUM!	22.0643
Q6UWY0	Arylsulfatase K	ARSK	0	4486600	#NUM!	22.0972
F5H0F6;P13224;P13224-2	Platelet glycoprotein Ib beta chain	GP1BB	0	5019700	#NUM!	22.2592
Q9Y5Q8;Q9Y5Q8-2;Q5T7U4;C9J393;Q5T7U0;H0Y3Y0;H0Y5D2	General transcription factor 3C polypeptide 5	GTF3C5	0	6855100	#NUM!	22.7087
Q92828	Coronin-2A	CORO2A	0	9941600	#NUM!	23.245
Q5JSJ4	Protein DDX26B	DDX26B	0	10546000	#NUM!	23.3302
P34810-2;P34810	Macrosialin	CD68	0	11204000	#NUM!	23.4175
F5H3P9;Q969M3;Q969M3-3;E5RGR9;E5RHH4;Q969M3-2	Protein YIPF5	YIPF5	0	11513000	#NUM!	23.4568
G3V4L5;Q9BQT8	Mitochondrial 2-oxodicarboxylate carrier	SLC25A21	0	11541000	#NUM!	23.4603
Q9HD89	Resistin	RETN	0	11620000	#NUM!	23.4701
E9PIC0;O14521;H0YD96;H0YD41;G3V173;E9PK73;E9PIG3	Succinate dehydrogenase [ubiquinone] cytochrome b small subunit, mitochondrial	SDHD	0	11664000	#NUM!	23.4756
P10412	Histone H1.4	HIST1H1E	0	12277000	#NUM!	23.5495
E9PC53;Q8TBK2-2;Q8TBK2	N-lysine methyltransferase SETD6	SETD6	0	12862000	#NUM!	23.6166
Q8IY31;Q8IY31-3;Q8IY31-2	Intraflagellar transport protein 20 homolog	IFT20	0	13279000	#NUM!	23.6626
E9PHH3;P18827	Syndecan-1	SDC1	0	13453000	#NUM!	23.6814
E7ESM2;E7ET40;P00749-2;P00749	Urokinase-type plasminogen activator;Urokinase-type plasminogen activator long chain A;Urokinase-type plasminogen activator short chain A;Urokinase-type plasminogen activator chain B	PLAU	0	13675000	#NUM!	23.705
Q53FA3;P34931;F8W1P1;B4DXY3;F8WEE3	Heat shock 70 kDa protein 1-like	HSPA1L	0	13823000	#NUM!	23.7206
B8ZZN0;E7EVB9;A1KXE4-2;A1KXE4	Myelin-associated neurite-outgrowth inhibitor	FAM168B	0	14499000	#NUM!	23.7895
Q5TA12;Q5JWR5	Protein dopey-1	DOPEY1	0	14597000	#NUM!	23.7992
Q9P2J9	[Pyruvate dehydrogenase [acetyl-transferring]]-phosphatase 2, mitochondrial	PDP2	0	14782000	#NUM!	23.8173
P03928	ATP synthase protein 8	MT-ATP8	0	15496000	#NUM!	23.8854
Q6T4P5-4;Q6T4P5;Q6T4P5-2;Q6T4P5-3	Lipid phosphate phosphatase-related protein type 3	LPPR3	0	16162000	#NUM!	23.9461
H0YE97;H0YEY8;H0YD48;H0YEF7;H0YEH1		PICALM	0	16289000	#NUM!	23.9574
B5MBZ9;H0YJJ1;G3V2F8;Q8TBZ3;Q8TBZ3-2;E7EUY8;H0YKE8;B3KPG5;B3KR43;F8W9S4;Q8NCN7	WD repeat-containing protein 20	WDR20;ANO6	0	16699000	#NUM!	23.9933
P08236-2	Beta-glucuronidase	GUSB	0	16906000	#NUM!	24.011
D6R996;D6RDU6;D6RBU3;D6RA38;Q9UBS8;D6R988;D6RBK4;D6RAS4;E7EP22;B7Z3J5;B7Z229	E3 ubiquitin-protein ligase RNF14	RNF14	0	16945000	#NUM!	24.0144
Q8WUM9	Sodium-dependent phosphate transporter 1	SLC20A1	0	17388000	#NUM!	24.0516
F8W8N5;Q9UNA1-2;Q9UNA1	Rho GTPase-activating protein 26	ARHGAP26	0	17480000	#NUM!	24.0592
G3V506;B4DLA5;O15033-2;O15033;H0YJ69;G3V2B5	Apoptosis-resistant E3 ubiquitin protein ligase 1	AREL1	0	17497000	#NUM!	24.0606
P31946-2	14-3-3 protein beta/alpha;14-3-3 protein beta/alpha, N-terminally processed	YWHAB	0	18928000	#NUM!	24.174
F5GXB9;F5H2T3;F8WDQ6;F5H3R3;F5H6E4;G5EA39;P60006;G3V1Q3	Anaphase-promoting complex subunit 15	ANAPC15	0	19371000	#NUM!	24.2074
P20336	Ras-related protein Rab-3A	RAB3A	0	19396000	#NUM!	24.2093
D6RF72;D6R9S7;D6R9M9;D6RHE3;D6RDB0;D6R9X6;E7ES98;A8MQ22;Q96GZ6-6;Q96GZ6-7;Q96GZ6-5;E7ENY4;Q96GZ6-2;Q96GZ6	Solute carrier family 41 member 3	SLC41A3	0	19868000	#NUM!	24.2439
Q6XQN6-3;Q6XQN6;C9J8U2;C9JC60;G5E977;Q6XQN6-2	Nicotinate phosphoribosyltransferase	NAPRT	0	20802000	#NUM!	24.3102
Q8ND25;Q8ND25-2	E3 ubiquitin-protein ligase ZNRF1	ZNRF1	0	20824000	#NUM!	24.3117
Q52LR7	Enhancer of polycomb homolog 2	EPC2	0	21405000	#NUM!	24.3514
Q8NG68	Tubulin--tyrosine ligase	TTL	0	21681000	#NUM!	24.3699
Q8IVV7	Glucose-induced degradation protein 4 homolog	GID4	0	21964000	#NUM!	24.3886
Q15796-2;Q15796;H0YMP2;H0YL71;H0YL41;D6RAY1;D6REQ3;D6RDN7;D6RIZ9;D6RD62;D6RBB4;H0YNV1;H0YKE2;H0YAK7	Mothers against decapentaplegic homolog 2	SMAD2	0	22188000	#NUM!	24.4033
Q9ULC3	Ras-related protein Rab-23	RAB23	0	22813000	#NUM!	24.4434
Q96R06	Sperm-associated antigen 5	SPAG5	0	23177000	#NUM!	24.4662
Q9UM21	Alpha-1,3-mannosyl-glycoprotein 4-beta-N-acetylglucosaminyltransferase A;Alpha-1,3-mannosyl-glycoprotein 4-beta-N-acetylglucosaminyltransferase A soluble form	MGAT4A	0	23303000	#NUM!	24.474
Q93077;Q7L7L0;P04908	Histone H2A type 1-C;Histone H2A type 3;Histone H2A type 1-B/E	HIST1H2AC;HIST3H2A;HIST1H2AB	0	23888000	#NUM!	24.5098
Q9NZJ6;Q5T063	Hexaprenyldihydroxybenzoate methyltransferase, mitochondrial	COQ3	0	24890000	#NUM!	24.5691
D6REL0;Q9NRR3	CDC42 small effector protein 2	CDC42SE2	0	25096000	#NUM!	24.581
D3YTH9;D3YTG6;Q9UHB4;Q9UHB4-2	NADPH-dependent diflavin oxidoreductase 1	NDOR1	0	25314000	#NUM!	24.5934
B8ZZI9;Q6ULP2-5;Q6ULP2-2;Q6ULP2-4;Q6ULP2	Aftiphilin	AFTPH	0	25604000	#NUM!	24.6099
Q9BZZ5-2;G3V1C3;B4DGR0;Q9BZZ5-3;Q9BZZ5-1;B4DDR3;H0YER7;E9PQK6	Apoptosis inhibitor 5	API5	0	25655000	#NUM!	24.6127
B3KRR0;Q96S40;P07992	DNA excision repair protein ERCC-1	ERCC1	0	26196000	#NUM!	24.6428
F5H8L9;Q92562	Polyphosphoinositide phosphatase	FIG4	0	26233000	#NUM!	24.6449
B7ZAZ9;Q14142;Q548W9	Tripartite motif-containing protein 14	TRIM14	0	26302000	#NUM!	24.6487
Q14161;F8VXI9;Q14161-4;Q14161-3;Q14161-8;Q14161-5;F8WAK2;Q14161-10;F5H882;F8W7V0;Q14161-9;Q14161-6;Q14161-11;Q14161-7;F8W822;Q14161-2;F8VVT4;F8VNZ4;F8W1F8;F8VPX7	ARF GTPase-activating protein GIT2	GIT2	0	27025000	#NUM!	24.6878
P30279	G1/S-specific cyclin-D2	CCND2	0	27026000	#NUM!	24.6878
B7ZKP8;P68543	UBX domain-containing protein 2A	UBXN2A	0	28623000	#NUM!	24.7707
P51610;P51610-2;P51610-3;Q9Y5Z7	Host cell factor 1;HCF N-terminal chain 1;HCF N-terminal chain 2;HCF N-terminal chain 3;HCF N-terminal chain 4;HCF N-terminal chain 5;HCF N-terminal chain 6;HCF C-terminal chain 1;HCF C-terminal chain 2;HCF C-terminal chain 3;HCF C-terminal chain 4;HCF C-terminal chain 5;HCF C-terminal chain 6	HCFC1	0	29010000	#NUM!	24.79
Q5JS54;C9J2F8;D6REN3;D6RB92;F8WBZ2;F2Z3E0	Proteasome assembly chaperone 4	PSMG4	0	29077000	#NUM!	24.7934
P36406-3;P36406-2;P36406	E3 ubiquitin-protein ligase TRIM23	TRIM23	0	29228000	#NUM!	24.8008
O14732-2;O14732	Inositol monophosphatase 2	IMPA2	0	30062000	#NUM!	24.8414
Q6PID6	Tetratricopeptide repeat protein 33	TTC33	0	30439000	#NUM!	24.8594
Q9NPB8;H0Y565;E9PDI1	Glycerophosphocholine phosphodiesterase GPCPD1	GPCPD1	0	31991000	#NUM!	24.9312
F5GWR2			0	32254000	#NUM!	24.943
Q9UK73	Protein fem-1 homolog B	FEM1B	0	32574000	#NUM!	24.9572
Q9UHJ6	Sedoheptulokinase	SHPK	0	33280000	#NUM!	24.9882
Q9H4E7;F5H853	Differentially expressed in FDCP 6 homolog	DEF6	0	33380000	#NUM!	24.9925
H0Y9B0;H0YA18;D6RGX2;Q9NUQ7	Ufm1-specific protease 2	UFSP2	0	33650000	#NUM!	25.0041
B1AKZ5;Q15121	Astrocytic phosphoprotein PEA-15	PEA15	0	33977000	#NUM!	25.0181
C9IZ87;B7ZLI8;Q5JP78;P49842-4;P49842-3;P49842-2;P49842	Serine/threonine-protein kinase 19	STK19	0	34036000	#NUM!	25.0206
H0YKT5;F8W964;E9PD64;H0YKN8;H0YL70;Q04726-2;Q04726;H0YNT2;B4E2W3;H0YLI3	Transducin-like enhancer protein 3	LITAF;TLE3	0	34470000	#NUM!	25.0388
D6RCT6;D6RIA0;D6R9E3;Q9BWT6	Meiotic nuclear division protein 1 homolog	MND1	0	34877000	#NUM!	25.0558
Q9BTE3	Mini-chromosome maintece complex-binding protein	MCMBP	0	35307000	#NUM!	25.0735
F8W8D3;Q14493;H0YAE8;E7EUV9;Q14493-2;C9IY53	Histone RNA hairpin-binding protein	SLBP	0	36096000	#NUM!	25.1053
Q96EX3	WD repeat-containing protein 34	WDR34	0	37259000	#NUM!	25.1511
Q8TAP6;Q8TAP6-2;Q8TAP6-3	Centrosomal protein of 76 kDa	CEP76	0	37551000	#NUM!	25.1623
H0YHT5;H0Y6F0;B4DZE9;Q5VUJ9-2;Q5VUJ9	EF-hand calcium-binding domain-containing protein 2	EFCAB2	0	38036000	#NUM!	25.1809
Q9NX14;Q9NX14-2	NADH dehydrogenase [ubiquinone] 1 beta subcomplex subunit 11, mitochondrial	NDUFB11	0	38250000	#NUM!	25.189
G5E9N3;Q6NUM9-2;Q6NUM9	All-trans-retinol 13,14-reductase	RETSAT	0	38810000	#NUM!	25.2099
O75896;G3V0I0;F2Z2A9	Tumor suppressor candidate 2	TUSC2	0	39657000	#NUM!	25.2411
Q9UNK0	Syntaxin-8	STX8	0	40299000	#NUM!	25.2642
O95551;O95551-2;F5H3E4;O95551-3	Tyrosyl-DNA phosphodiesterase 2	TDP2	0	40760000	#NUM!	25.2807
O75486-2;O75486-3;O75486	Transcription initiation protein SPT3 homolog	SUPT3H	0	40980000	#NUM!	25.2884
Q5QPE7;Q5QPE8;Q9BQP7	Mitochondrial genome maintece exonuclease 1	MGME1	0	41088000	#NUM!	25.2922
Q09GN1;F5H5V2;Q71F23-2;Q09GN2;Q71F23	Centromere protein U	MLF1IP;CENPU	0	41319000	#NUM!	25.3003
Q9HBM1	Kinetochore protein Spc25	SPC25	0	41635000	#NUM!	25.3113
Q659C4;Q659C4-9;G3V0E9;H0Y9K3;D6R9W6;G3XAJ5;Q659C4-3	La-related protein 1B	LARP1B	0	41860000	#NUM!	25.3191
Q9NXN4-2;Q9NXN4	Ganglioside-induced differentiation-associated protein 2	GDAP2	0	42650000	#NUM!	25.346
Q9GZX9	Twisted gastrulation protein homolog 1	TWSG1	0	43398000	#NUM!	25.3711
B4DKB2;P42892-3;P42892-2;P42892-4;P42892;E9PDM6;E9PJG1	Endothelin-converting enzyme 1	ECE1	0	44010000	#NUM!	25.3913
G3V113;Q15819;H0YBP9;H0YBX6;D6RG00	Ubiquitin-conjugating enzyme E2 variant 2	UBE2V2	0	44395000	#NUM!	25.4039
Q8N8Y2	V-type proton ATPase subunit d 2	ATP6V0D2	0	44541000	#NUM!	25.4086
B0QYI1;Q8WUA7;Q8WUA7-2;B0QYI3;Q8WUA7-3;Q9NU19;F8WDP1	TBC1 domain family member 22A	TBC1D22A	0	45244000	#NUM!	25.4312
Q9P0R6;G3V368;G3V4I5	GSK3-beta interaction protein	GSKIP	0	45463000	#NUM!	25.4382
Q8WZA0;B4E2N0	Protein LZIC	LZIC	0	46106000	#NUM!	25.4585
A8MWE3;E9PJF5;H0YCF7;G5E9I4;Q9HCU9;E9PPD1	Breast cancer metastasis-suppressor 1	BRMS1	0	46607000	#NUM!	25.474
Q96AJ9-1;Q96AJ9	Vesicle transport through interaction with t-SNAREs homolog 1A	VTI1A	0	46683000	#NUM!	25.4764
P58511	Small integral membrane protein 11	SMIM11	0	47481000	#NUM!	25.5008
Q9BRS2	Serine/threonine-protein kinase RIO1	RIOK1	0	47493000	#NUM!	25.5012
F8W7X5;O75928-3;O75928-2;O75928	E3 SUMO-protein ligase PIAS2	PIAS2	0	47978000	#NUM!	25.5159
Q8NDT2	Putative RNA-binding protein 15B	RBM15B	0	48136000	#NUM!	25.5206
D6RFI6;D6RAT8;D6RBK1;D6RJH2;D6R9I2;P52739-2;P52739	Zinc finger protein 131	ZNF131	0	48481000	#NUM!	25.5309
P51153	Ras-related protein Rab-13	RAB13	0	48592000	#NUM!	25.5342
F8W6N3;Q92560;C9J7L9;H0Y8E8	Ubiquitin carboxyl-terminal hydrolase BAP1	BAP1	0	48914000	#NUM!	25.5437
Q8IXW5;Q8IXW5-2	Putative RNA polymerase II subunit B1 CTD phosphatase RPAP2	RPAP2	0	49315000	#NUM!	25.5555
F8WAB8;Q70HW3-2;Q70HW3	S-adenosylmethionine mitochondrial carrier protein	SLC25A26	0	49372000	#NUM!	25.5572
C9JN85;Q13309;Q13309-2;D6RAG5;D6R9R7;B4DJT4	S-phase kinase-associated protein 2	SKP2	0	49498000	#NUM!	25.5609
G5E9Z2		CLPTM1L	0	49745000	#NUM!	25.568
Q8NG31-2;Q8NG31;E7EUS1;Q8NG31-3;Q8NG31-4;H0YCZ2;E9PPJ1	Protein CASC5	CASC5	0	50330000	#NUM!	25.5849
G5EA36		CDC27	0	50822000	#NUM!	25.5989
G3V1N2;P69905	Hemoglobin subunit alpha	HBA2;HBA1	0	50859000	#NUM!	25.6
F5H872;Q13503	Mediator of RNA polymerase II transcription subunit 21	MED21	0	51247000	#NUM!	25.611
B3KR15;Q9UKI8;Q9UKI8-2;B4DX87;Q9UKI8-3;B3KRP1;F8W7X8;H0Y2Z4;F8WAU8;C9JWT6	Serine/threonine-protein kinase tousled-like 1	TLK1	0	51351000	#NUM!	25.6139
E9PE95;Q6NUI2-5;Q6NUI2-3;Q6NUI2	Glycerol-3-phosphate acyltransferase 2, mitochondrial	GPAT2	0	53245000	#NUM!	25.6661
E9PLD3;E9PRG8		LOC102288414	0	54077000	#NUM!	25.6885
E1P5N7;O00762;A6NP33;G3XAB7	Ubiquitin-conjugating enzyme E2 C	UBE2C	0	54446000	#NUM!	25.6983
Q8N3F8;H0Y6J8;E9PCQ5	MICAL-like protein 1	MICALL1	0	54680000	#NUM!	25.7045
Q7L7V1-2;Q7L7V1	Putative pre-mRNA-splicing factor ATP-dependent RNA helicase DHX32	DHX32	0	54984000	#NUM!	25.7125
G3V4W0;B4DY08;G3V4C1;P07910-2;P07910-4;G3V5X6;G3V3K6;G3V251;G3V2D6	Heterogeneous nuclear ribonucleoproteins C1/C2	HNRNPC	0	55209000	#NUM!	25.7184
E9PQE5;E7ESC2;B4DV59;Q9P2K3-2;Q9P2K3-4;Q9P2K3;Q9P2K3-3;E9PR63	REST corepressor 3	RCOR3	0	55239000	#NUM!	25.7192
Q9UNE7-2;Q9UNE7	E3 ubiquitin-protein ligase CHIP	STUB1	0	56595000	#NUM!	25.7542
Q96L58	Beta-1,3-galactosyltransferase 6	B3GALT6	0	56670000	#NUM!	25.7561
Q99871-3;Q99871;Q99871-2;A6NDA1;B4DJM4	HAUS augmin-like complex subunit 7	HAUS7	0	58930000	#NUM!	25.8125
Q658Y4;E7ER68;H0YBR6;G3V120	Protein FAM91A1	FAM91A1	0	59632000	#NUM!	25.8296
Q8NDC0	MAPK-interacting and spindle-stabilizing protein-like	MAPK1IP1L	0	60240000	#NUM!	25.8442
F5H295;B3KRV7;P06858	Lipoprotein lipase	LPL	0	60478000	#NUM!	25.8499
A8MU21;Q9BVK8;A8MWW0	Transmembrane protein 147	TMEM147	0	61441000	#NUM!	25.8727
A2A376;B3KWW1;O95786-2;O95786;F5H5W6	Probable ATP-dependent RNA helicase DDX58	DDX58	0	61743000	#NUM!	25.8798
F8W7M0;O95628-5;O95628-3;O95628-2;O95628;O95628-8;O95628-4;O95628-7;E7ET38;F8VQP3;O95628-6	CCR4-NOT transcription complex subunit 4	CNOT4	0	61758000	#NUM!	25.8801
A6NKV8;D6REB4;Q9H074-2;D6RJ02;D6RJF2;D6RD97	Polyadenylate-binding protein-interacting protein 1	PAIP1	0	61865000	#NUM!	25.8826
O00459;E9PFP1	Phosphatidylinositol 3-kinase regulatory subunit beta	PIK3R2	0	62333000	#NUM!	25.8935
P25815	Protein S100-P	S100P	0	68219000	#NUM!	26.0237
Q9BTL3	RNMT-activating mini protein	FAM103A1	0	69635000	#NUM!	26.0533
Q96E11-8;Q96E11-3;Q96E11;Q96E11-2;Q4TT42;Q96E11-7;Q96E11-5;Q96E11-6;Q96E11-4	Ribosome-recycling factor, mitochondrial	MRRF	0	70518000	#NUM!	26.0715
Q9BZE2	tRNA pseudouridine(38/39) synthase	PUS3	0	70607000	#NUM!	26.0733
Q15526-2;Q15526	Surfeit locus protein 1	SURF1	0	70657000	#NUM!	26.0743
Q9UDY8-2;Q9UDY8	Mucosa-associated lymphoid tissue lymphoma translocation protein 1	MALT1	0	71695000	#NUM!	26.0954
Q9BV44	THUMP domain-containing protein 3	THUMPD3	0	72044000	#NUM!	26.1024
Q14807;B7Z265;E7EUJ5	Kinesin-like protein KIF22	KIF22	0	73315000	#NUM!	26.1276
Q9H074;D6R9H8	Polyadenylate-binding protein-interacting protein 1	PAIP1	0	74027000	#NUM!	26.1415
Q9UPW5-2;Q9UPW5;Q9UPW5-3;Q5VZW6;Q5VZW3;B4DHX2	Cytosolic carboxypeptidase 1	AGTPBP1	0	75150000	#NUM!	26.1633
D6RFW3;Q969Q5	Ras-related protein Rab-24	RAB24	0	75153000	#NUM!	26.1633
C9J167;P54278;P54278-3;P54278-2;P54278-4	Mismatch repair endonuclease PMS2	PMS2	0	75185000	#NUM!	26.1639
P41214;P41214-2;Q5SY38	Eukaryotic translation initiation factor 2D	EIF2D	0	76650000	#NUM!	26.1918
F5GX28;O94953;O94953-2	Lysine-specific demethylase 4B	KDM4B	0	77091000	#NUM!	26.2001
C9JRP1;C9JXL3;E9PGC1;E9PFN4;E9PDL9;B6DY53;B6DY52;Q9Y6M7-4;Q9Y6M7-3;Q9Y6M7-2;B5M452;B2CI53;D3K174;Q9Y6M7;B5M453;F8W7E6;Q9Y6M7-5	Sodium bicarbonate cotransporter 3	SLC4A7	0	77214000	#NUM!	26.2024
Q15208	Serine/threonine-protein kinase 38	STK38	0	77951000	#NUM!	26.2161
Q9GZQ8;A6NCE7	Microtubule-associated proteins 1A/1B light chain 3B;Microtubule-associated proteins 1A/1B light chain 3 beta 2	MAP1LC3B;MAP1LC3B2	0	78003000	#NUM!	26.217
P43121;P43121-2	Cell surface glycoprotein MUC18	MCAM	0	78348000	#NUM!	26.2234
E9PKD1			0	78627000	#NUM!	26.2285
Q9GZN1;F8VP72;F8W043;F8W0Q1;F8VRL1;F8W057;G3V1Y1	Actin-related protein 6	ACTR6	0	79618000	#NUM!	26.2466
Q6P2P2;B3KU92;Q6P2P2-2	Putative protein arginine N-methyltransferase 9	PRMT9	0	80111000	#NUM!	26.2555
Q96P16;Q96P16-2;Q96P16-3	Regulation of nuclear pre-mRNA domain-containing protein 1A	RPRD1A	0	80925000	#NUM!	26.2701
Q9NWH9;A8K5V8;H0YKH2;H0YLW7;H0YMW8;H0YMM0;H0YNF3;H0YMR6;H0YLE6;H0YL55	SAFB-like transcription modulator	SLTM	0	81119000	#NUM!	26.2735
P23511-2;P23511	Nuclear transcription factor Y subunit alpha	NFYA	0	83274000	#NUM!	26.3114
Q8N4Q0;B4DZ91	Zinc-binding alcohol dehydrogenase domain-containing protein 2	ZADH2	0	83361000	#NUM!	26.3129
P41208	Centrin-2	CETN2	0	83473000	#NUM!	26.3148
Q9NRB3;C9J991	Carbohydrate sulfotransferase 12	CHST12	0	84302000	#NUM!	26.3291
D6RHD3;Q9BS16;H0Y9K8;D6RJF0;D6RC76	Centromere protein K	CENPK	0	85680000	#NUM!	26.3525
P31321	cAMP-dependent protein kinase type I-beta regulatory subunit	PRKAR1B	0	86037000	#NUM!	26.3585
P11474-2;P11474;H0YGT3;F5GWT5;E7EWD9;O95718-3;O95718-2;O95718	Steroid hormone receptor ERR1	ESRRA	0	86158000	#NUM!	26.3605
Q9BPW9;B7Z416;Q9BPW9-2;Q9BPW9-3	Dehydrogenase/reductase SDR family member 9	DHRS9	0	86652000	#NUM!	26.3687
Q9ULX6	A-kinase anchor protein 8-like	AKAP8L	0	87761000	#NUM!	26.3871
Q9Y287	Integral membrane protein 2B;BRI2, membrane form;BRI2 intracellular domain;BRI2C, soluble form;Bri23 peptide	ITM2B	0	88852000	#NUM!	26.4049
P11908;P11908-2;D3YTJ7;A6NMS2	Ribose-phosphate pyrophosphokinase 2	PRPS2	0	89492000	#NUM!	26.4153
B4DQT1;F5H3F8;B4DVN3;E7ESC7;Q7L5Y9-3;Q7L5Y9;Q7L5Y9-2;E7ENL1;D6RIB6;C9JD69;Q7L5Y9-4;D6RID6;D6RDW4;D6REW7;Q7L5Y9-5;D6RE80	Macrophage erythroblast attacher	MAEA	0	89543000	#NUM!	26.4161
Q8IUI8;B4DJU5	Cytokine receptor-like factor 3	CRLF3	0	89830000	#NUM!	26.4207
F5H2G2;Q9UHD9	Ubiquilin-2	UBQLN2	0	90335000	#NUM!	26.4288
Q9P260;Q9P260-2	LisH domain and HEAT repeat-containing protein KIAA1468	KIAA1468	0	90977000	#NUM!	26.439
H0YER3;H0YE25;H0YF25;B7Z1J9;Q8NB37-3;Q8NB37;Q8NB37-2	Parkinson disease 7 domain-containing protein 1	PDDC1	0	91050000	#NUM!	26.4402
F5GWH3;Q9HD23-2;Q9HD23;B4DMD9;B4DQL2	Magnesium transporter MRS2 homolog, mitochondrial	MRS2	0	91463000	#NUM!	26.4467
O60828-5;O60828-4;O60828-2;O60828;C9JQA1;O60828-10;O60828-9;O60828-8;O60828-7;O60828-6;O60828-3	Polyglutamine-binding protein 1	PQBP1	0	91721000	#NUM!	26.4507
Q9H061;E9PI16;E9PI90	Transmembrane protein 126A	TMEM126A	0	91995000	#NUM!	26.4551
Q5JPP8;Q92581;Q92581-2	Sodium/hydrogen exchanger 6	SLC9A6	0	92819000	#NUM!	26.4679
Q9BX68	Histidine triad nucleotide-binding protein 2, mitochondrial	HINT2	0	93372000	#NUM!	26.4765
Q9NRX4;Q9NRX4-2	14 kDa phosphohistidine phosphatase	PHPT1	0	93644000	#NUM!	26.4807
Q56VL3	OCIA domain-containing protein 2	OCIAD2	0	93939000	#NUM!	26.4852
Q9Y5V0;H0YC70;E5RHV4;H0YAP1;E5RHR6	Zinc finger protein 706	ZNF706	0	94304000	#NUM!	26.4908
P04049;P04049-2;B4E0X2;B4E1N6	RAF proto-oncogene serine/threonine-protein kinase	RAF1	0	94712000	#NUM!	26.497
Q9Y5X2;C9J271;C9J8E6;C9J014	Sorting nexin-8	SNX8	0	94886000	#NUM!	26.4997
Q9NPY3;E7ENZ5;Q9UHG2	Complement component C1q receptor	CD93	0	96385000	#NUM!	26.5223
Q16626	Male-enhanced antigen 1	MEA1	0	96440000	#NUM!	26.5231
B1AUU8;P42566;A6NL94;P42566-2	Epidermal growth factor receptor substrate 15	EPS15	0	97980000	#NUM!	26.546
Q9Y5Y2;B7Z6P0	Cytosolic Fe-S cluster assembly factor NUBP2	NUBP2	0	98288000	#NUM!	26.5505
Q9NZZ3;Q9NZZ3-2	Charged multivesicular body protein 5	CHMP5	0	98890000	#NUM!	26.5593
B0S7P1;P25440;P25440-2;H0Y6K2;H0Y5T9;B0V073;B0V072;H0Y602;F8VXF8;Q658Y7;E9PIQ3;H0Y801;H0Y799;H0YAU3;H0Y665;E9PKQ9;H0YDJ7	Bromodomain-containing protein 2	BRD2	0	99095000	#NUM!	26.5623
F2Z2A7;H0Y6H0;Q8NB78-2;Q8NB78;Q8NB78-4;Q08EI0	Lysine-specific histone demethylase 1B	KDM1B	0	101630000	#NUM!	26.5988
Q9Y237;Q9Y237-2;H0Y4T6;H0Y8P6;H0Y610;F5H1P5	Peptidyl-prolyl cis-trans isomerase NIMA-interacting 4	PIN4	0	102320000	#NUM!	26.6085
Q9H496	Torsin-1A-interacting protein 2, isoform IFRG15	TOR1AIP2	0	104150000	#NUM!	26.6341
P05423;E7EQ68;E5RHT4	DNA-directed RNA polymerase III subunit RPC4	POLR3D	0	104430000	#NUM!	26.638
[truncated: 1,062 more rows]
